# Supplementary material for: Regioselectivity of aminomethylation in 3-acetyl-7-hydroxycoumarins: Mannich bases and Betti bases
Source: Royal Society of Chemistry journal article supplement (doi:10.1039/d1nj01584b), 2021-01-01
Supplement: d1nj01584b1.pdf [file d1nj01584b1.pdf]

## ***Supporting Information***

***For***

### **Regioselectivity of aminomethylation in 3-acetyl-7-hydroxycoumarins:**

#### **Mannich bases and Betti bases**

Fan Gao, Deng Tao, Cheng Ju, Bei-Bei Yang, Xiu-Qi Bao, Dan Zhang, Tian-Tai  
Zhang, Li Li\*

*Beijing Key Laboratory of Active Substances Discovery and Druggability Evaluation,  
Institute of Materia Medica, Chinese Academy of Medical Sciences & Peking Union Medical  
College, Beijing 100050, China*

Corresponding author: [annaleelin@imm.ac.cn](mailto:annaleelin@imm.ac.cn)

|                                                                          |            |
|--------------------------------------------------------------------------|------------|
| <b>1 <sup>1</sup>H- and <sup>13</sup>C-NMR spectra of compounds 8-29</b> | <b>S2</b>  |
| <b>2 ESI-HRMS spectra of compounds 8-29</b>                              | <b>S46</b> |
| <b>3 Cartesian coordinates of compounds 6, 30-33</b>                     | <b>S68</b> |
| <b>4 Sources of the reagents used in the synthesis process</b>           | <b>S72</b> |

1.  $^1\text{H}$ - and  $^{13}\text{C}$ -NMR spectra of compounds 8-29.

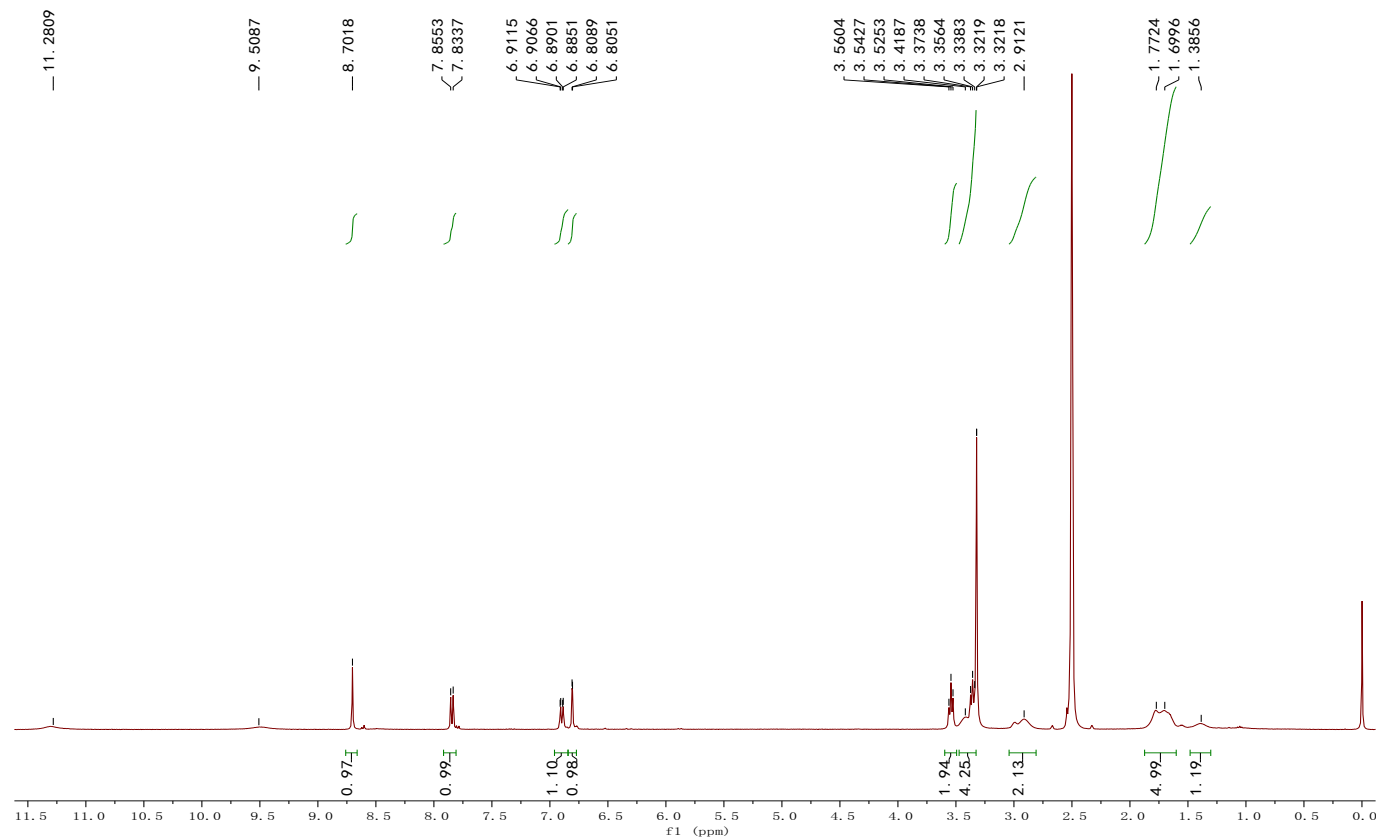

$^1\text{H}$ -NMR (400 MHz) spectrum of compound **8** in  $\text{DMSO-}d_6$

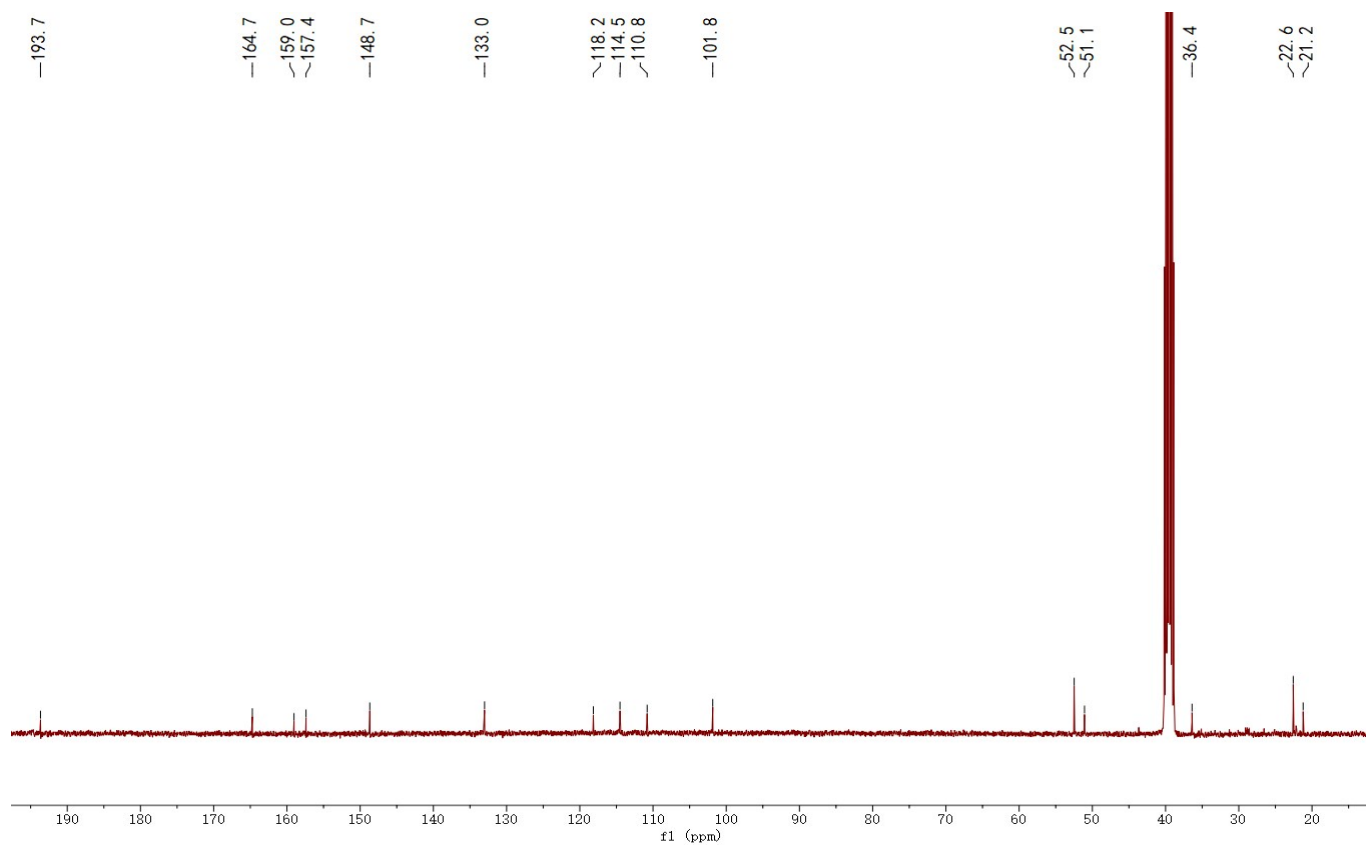

$^{13}\text{C}$ -NMR (100 MHz) spectrum of compound **8** in  $\text{DMSO-}d_6$

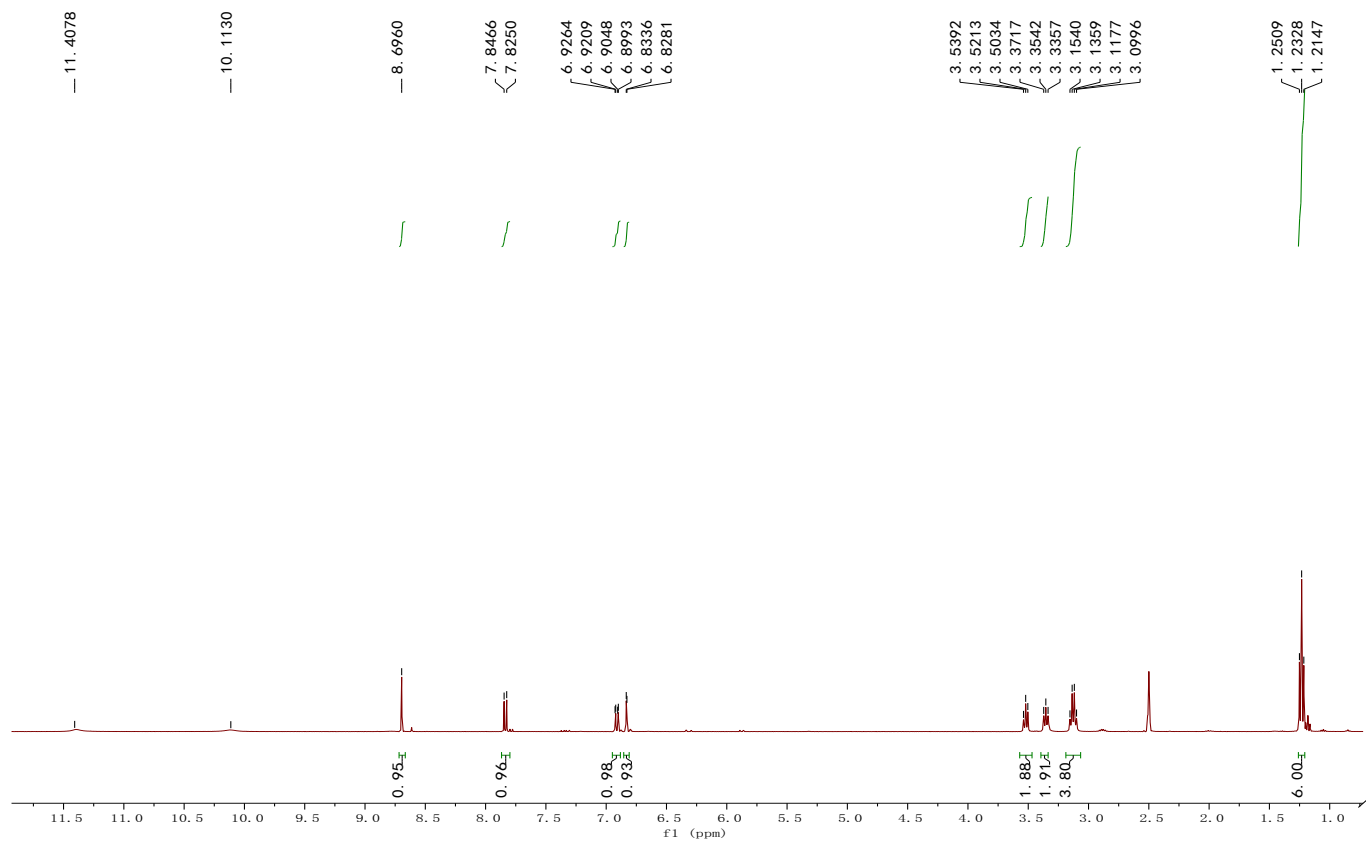

$^1\text{H-NMR}$  (400 MHz) spectrum of compound **9** in  $\text{DMSO-}d_6$

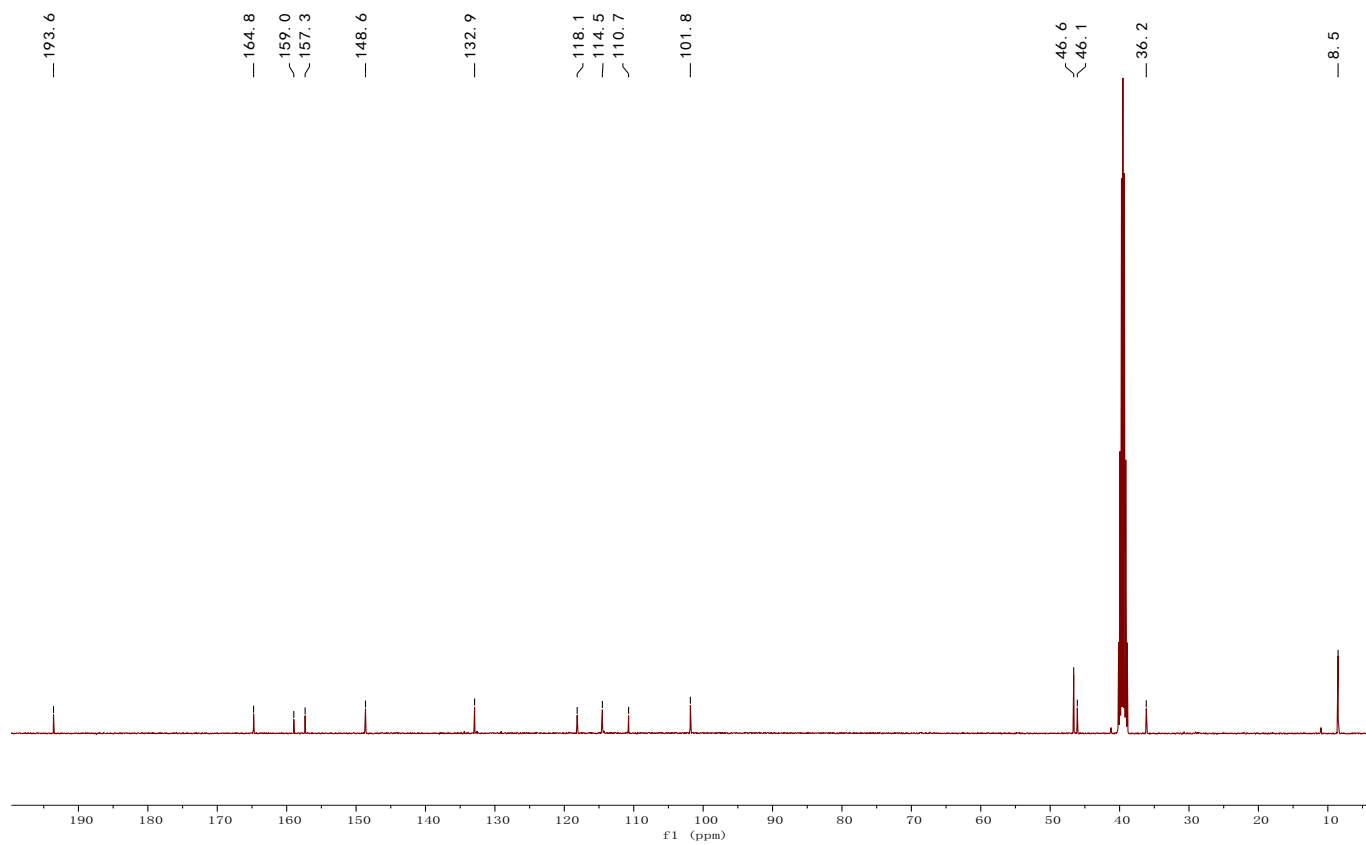

<sup>13</sup>C-NMR (100 MHz) spectrum of compound **9** in DMSO-*d*<sub>6</sub>

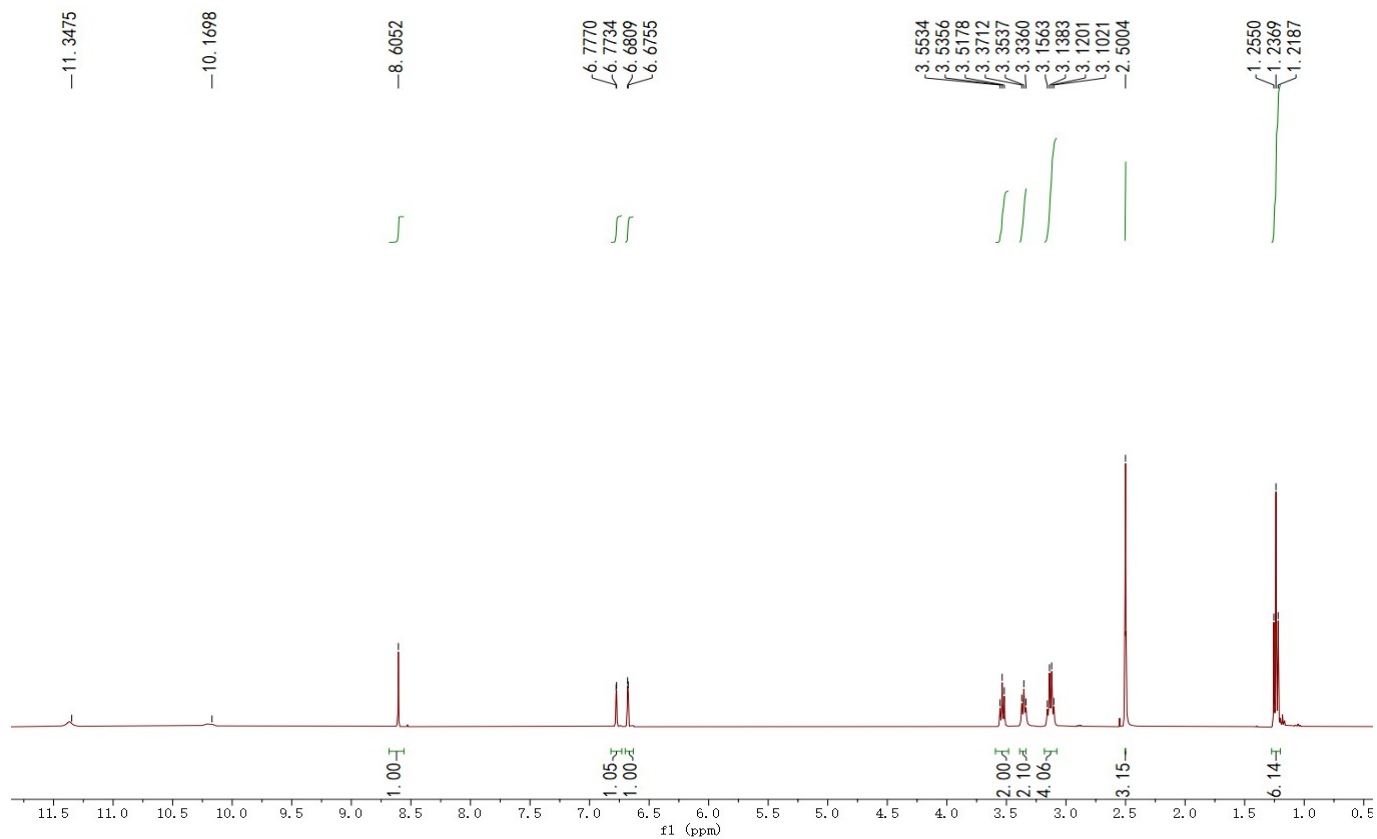

$^1\text{H-NMR}$  (400 MHz) spectrum of compound **10** in  $\text{DMSO-}d_6$

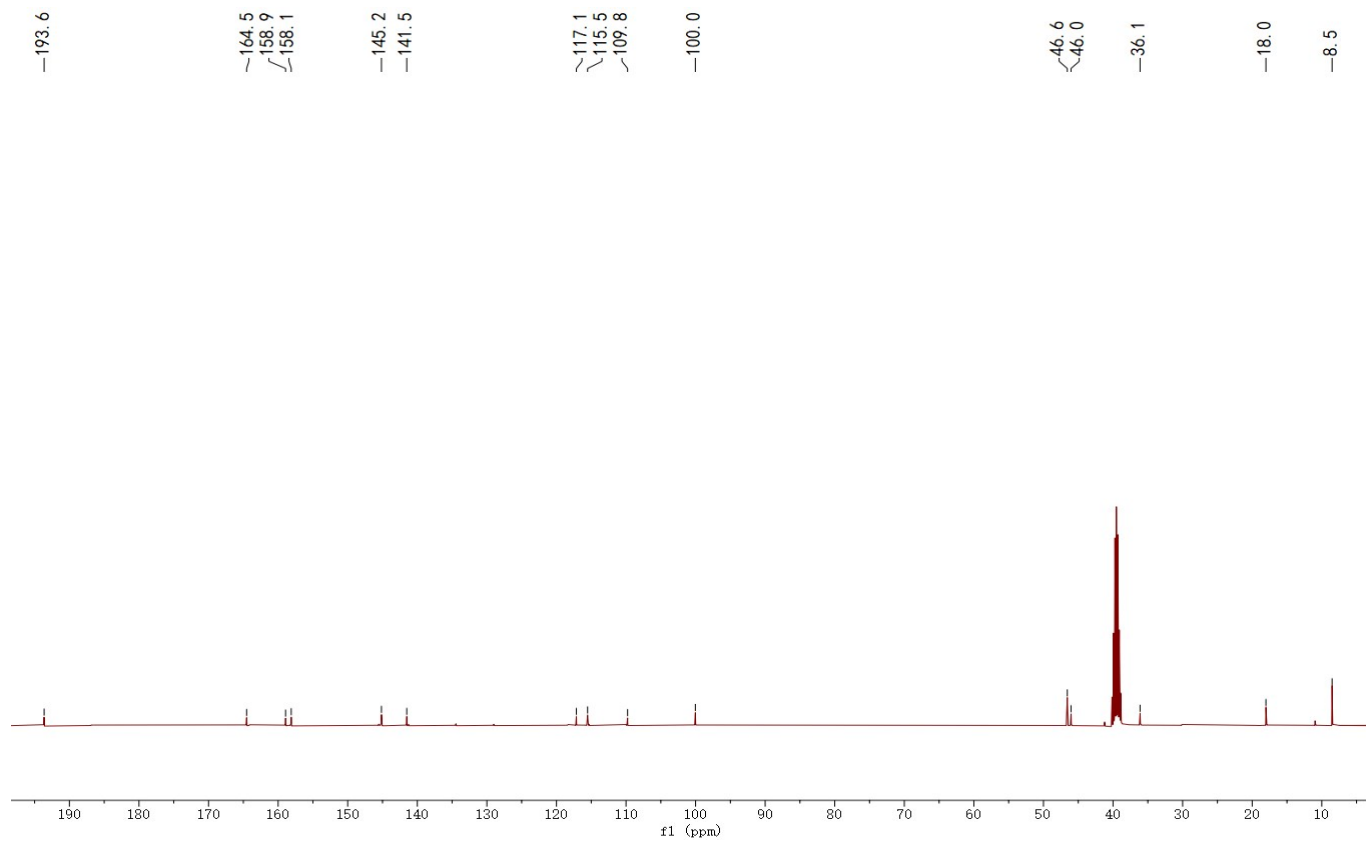

$^{13}\text{C}$ -NMR (100 MHz) spectrum of compound **10** in  $\text{DMSO-}d_6$

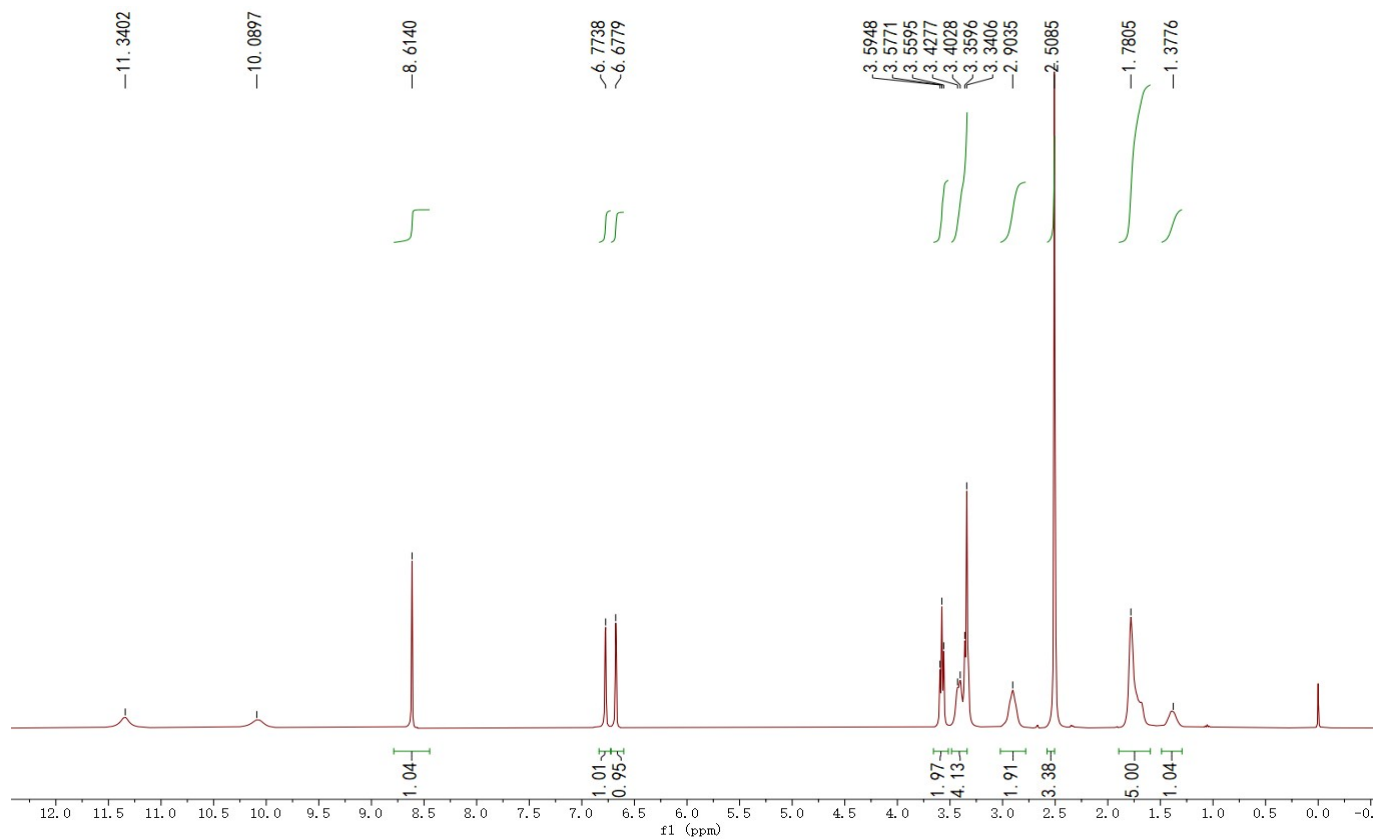

$^1\text{H-NMR}$  (400 MHz) spectrum of compound **11** in  $\text{DMSO-}d_6$



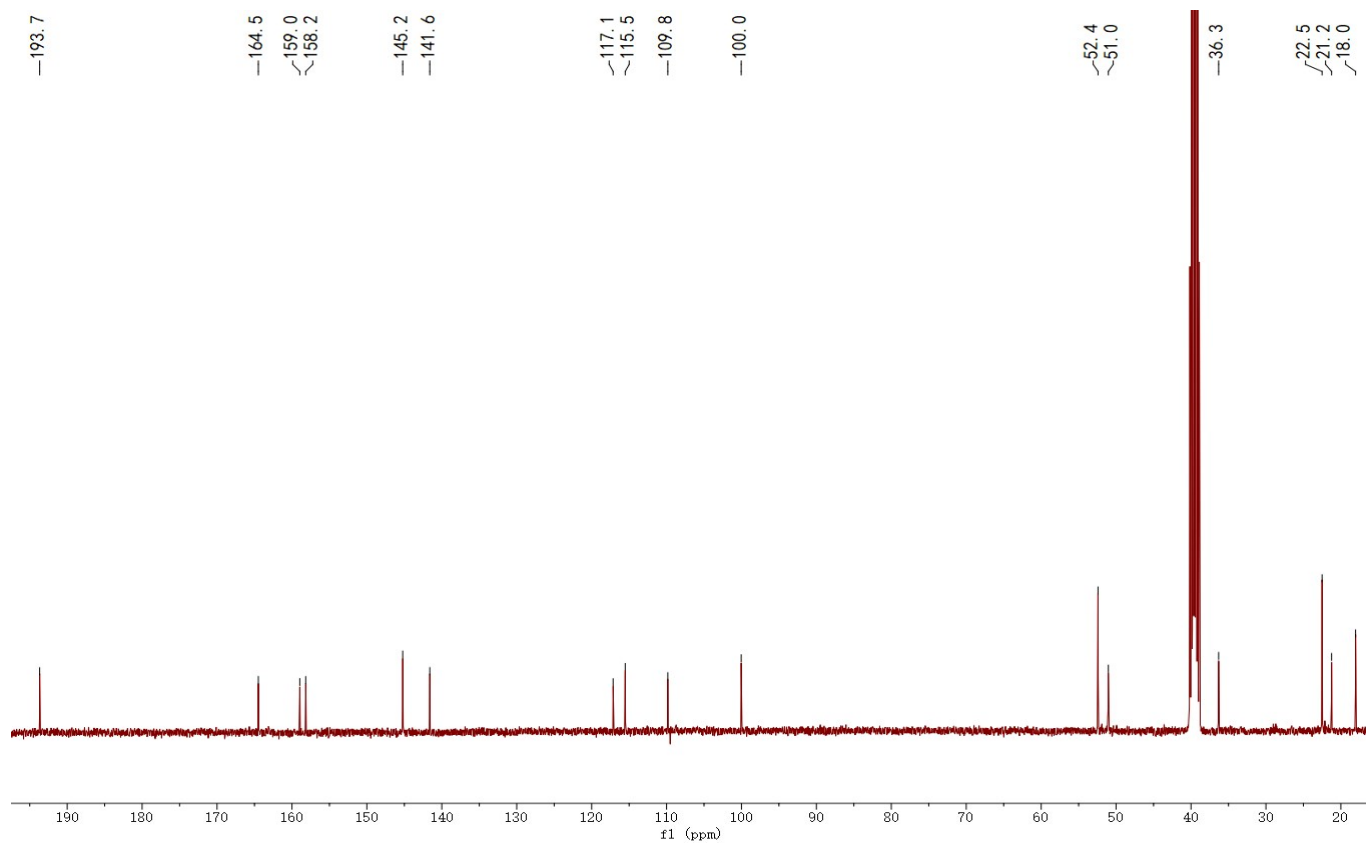

$^{13}\text{C}$ -NMR (100 MHz) spectrum of compound **11** in  $\text{DMSO-}d_6$

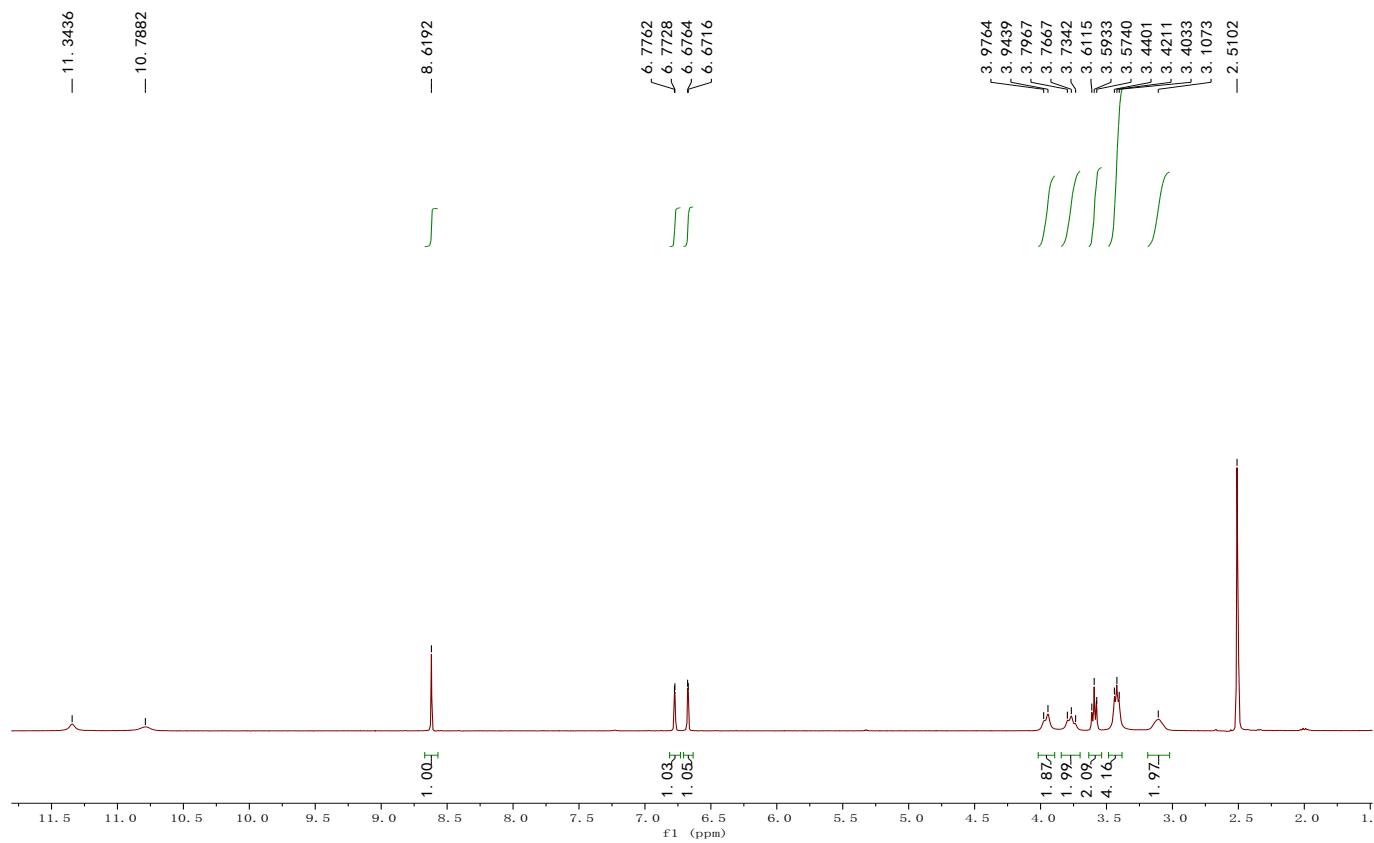

$^1\text{H-NMR}$  (400 MHz) spectrum of compound **12** in  $\text{DMSO-}d_6$

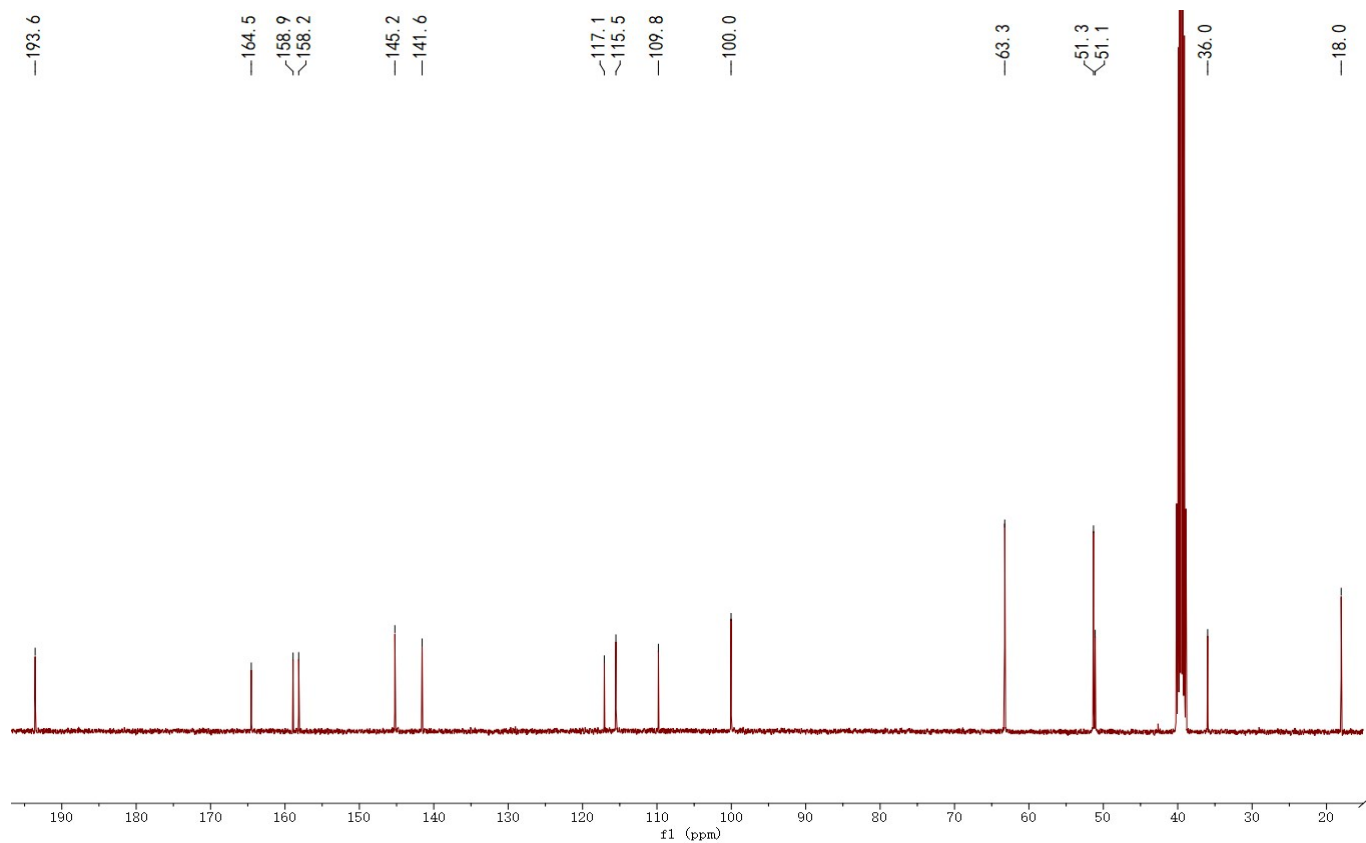

$^{13}\text{C}$ -NMR (100 MHz) spectrum of compound **12** in  $\text{DMSO-}d_6$

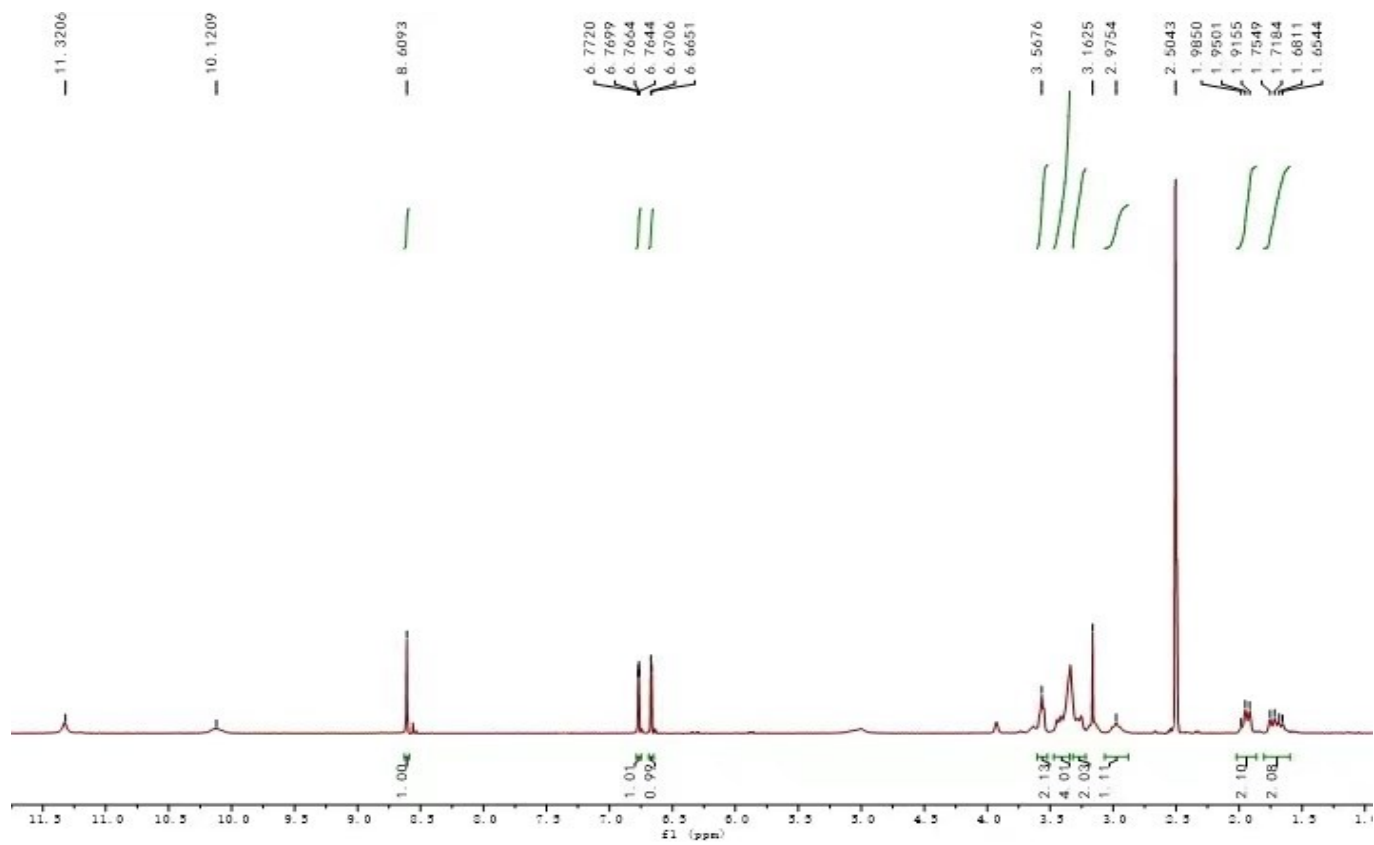

$^1\text{H-NMR}$  (400 MHz) spectrum of compound **13** in  $\text{DMSO-}d_6$

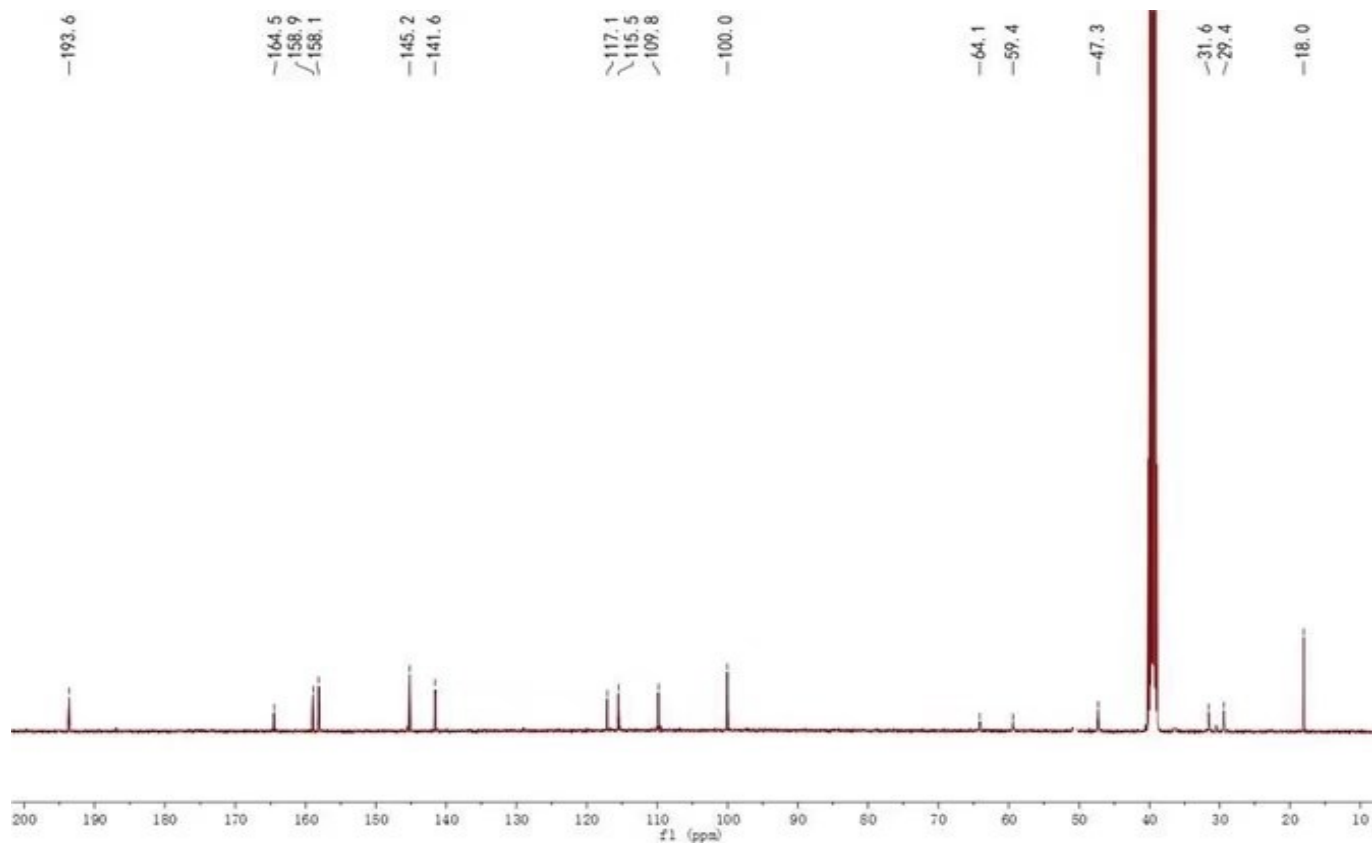

<sup>13</sup>C-NMR (100 MHz) spectrum of compound **13** in DMSO-*d*<sub>6</sub>

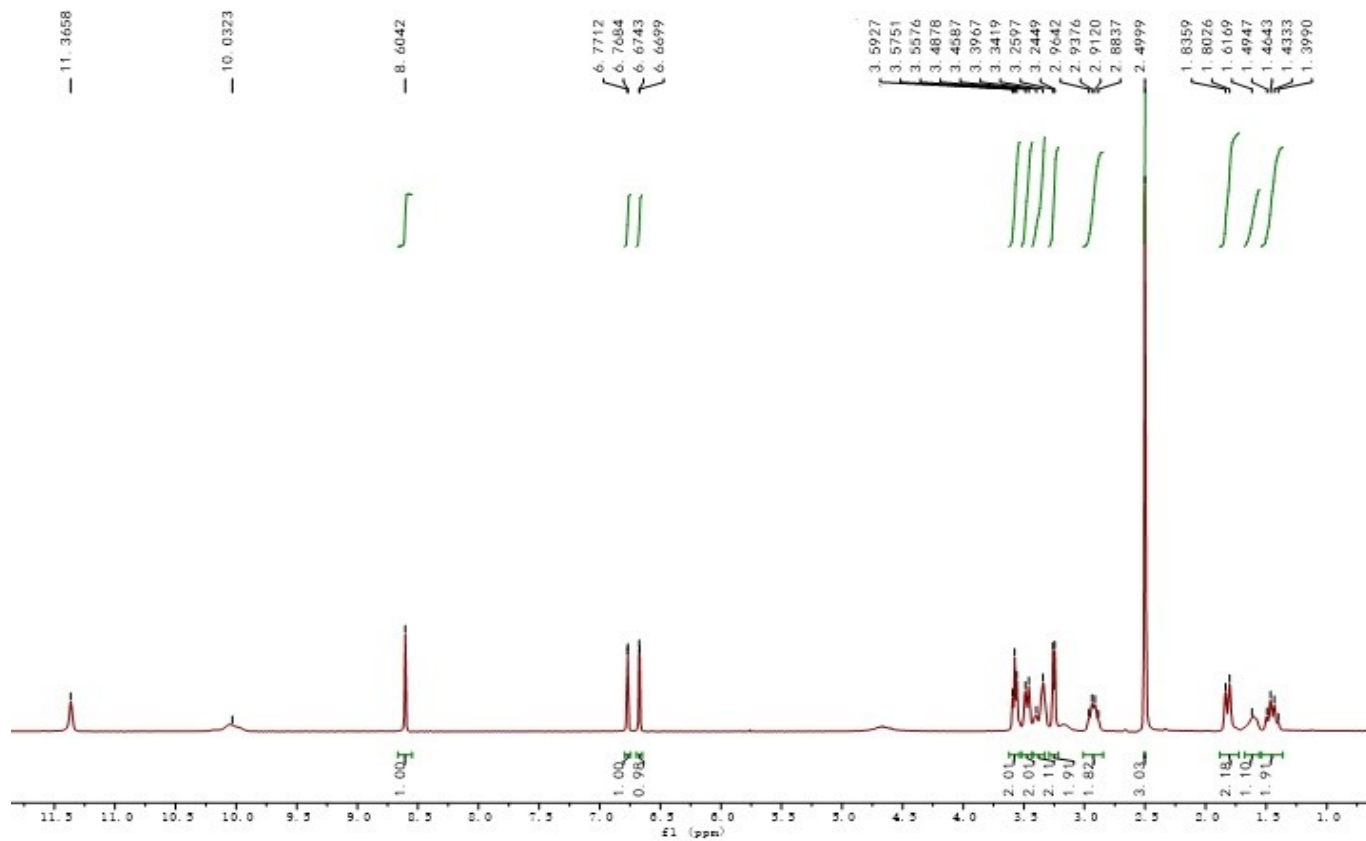

$^1\text{H-NMR}$  (400 MHz) spectrum of compound **14** in  $\text{DMSO-}d_6$

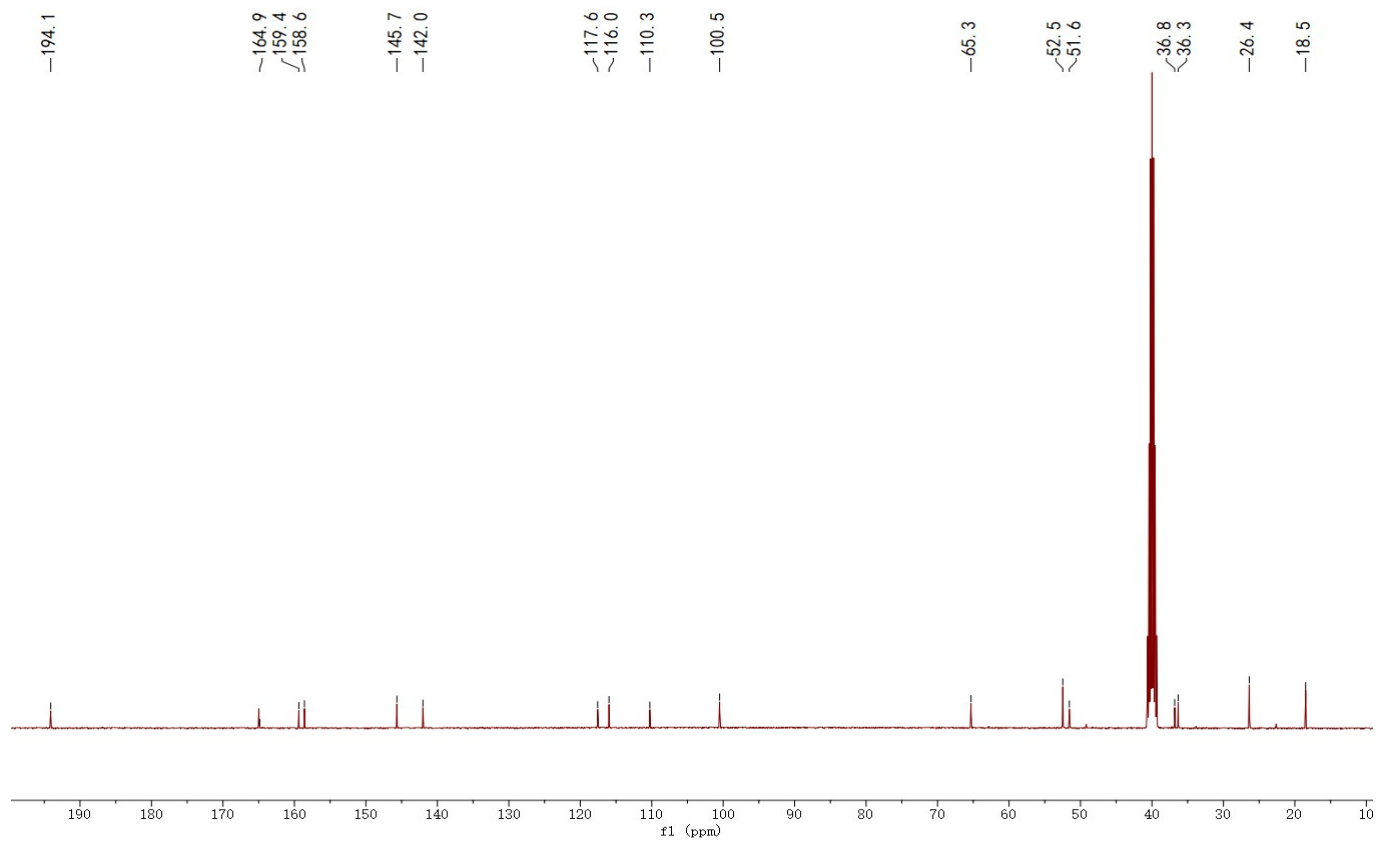

$^{13}\text{C}$ -NMR (100 MHz) spectrum of compound **14** in  $\text{DMSO-}d_6$

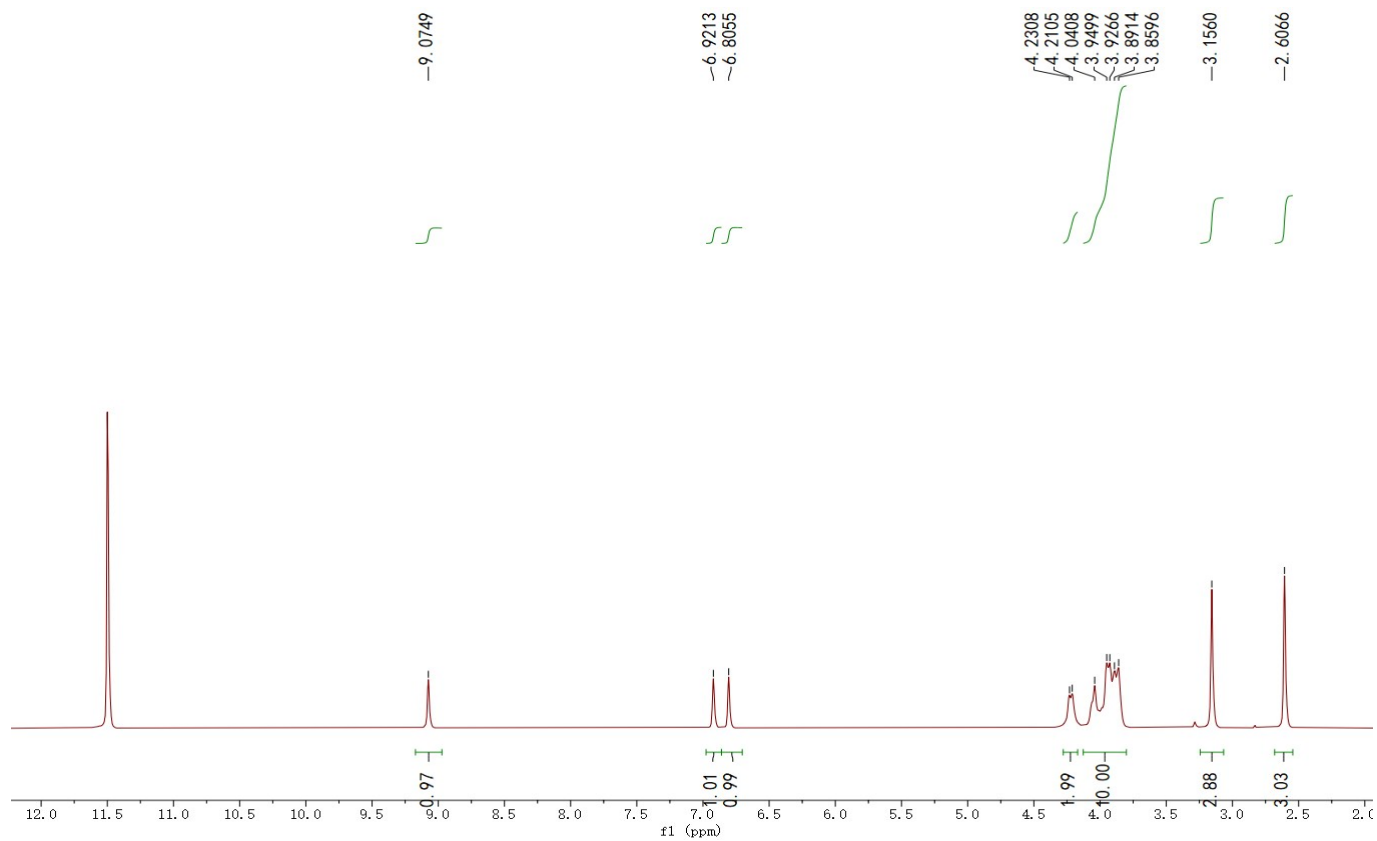

$^1\text{H-NMR}$  (400 MHz) spectrum of compound **15** in trifluoroacetic acid-*d*



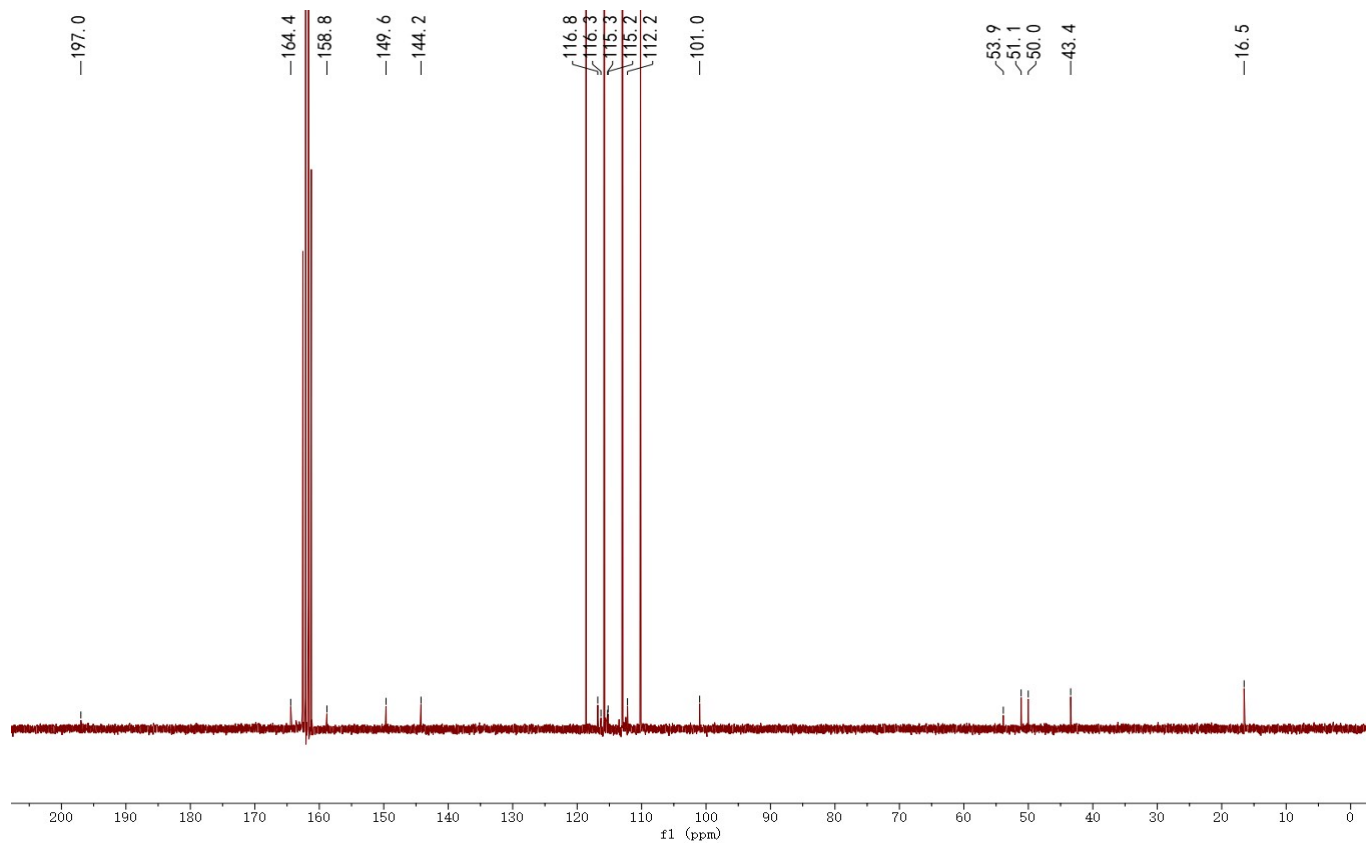

$^{13}\text{C}$ -NMR (100 MHz) spectrum of compound **15** in trifluoroacetic acid-*d*

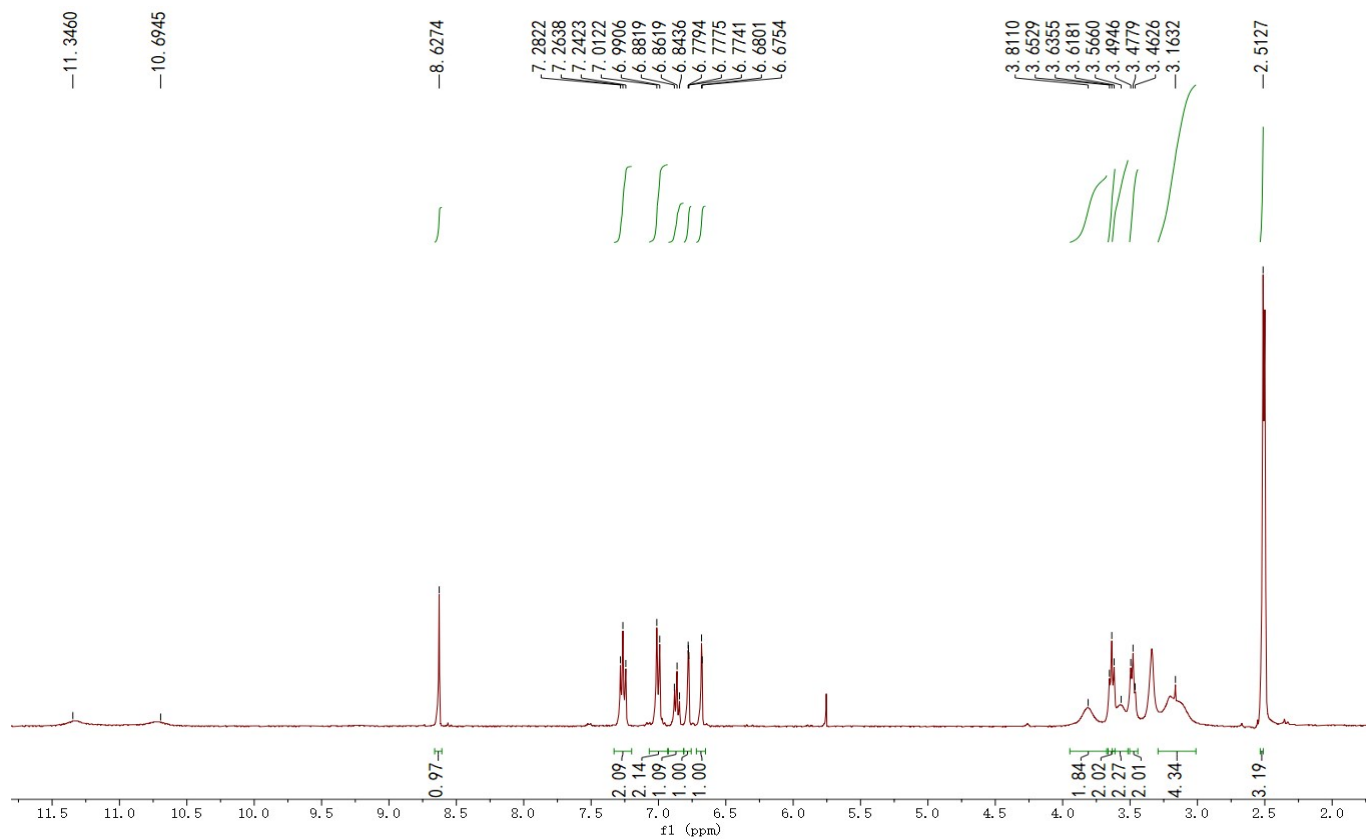

$^1\text{H-NMR}$  (400 MHz) spectrum of compound **16** in  $\text{DMSO-}d_6$

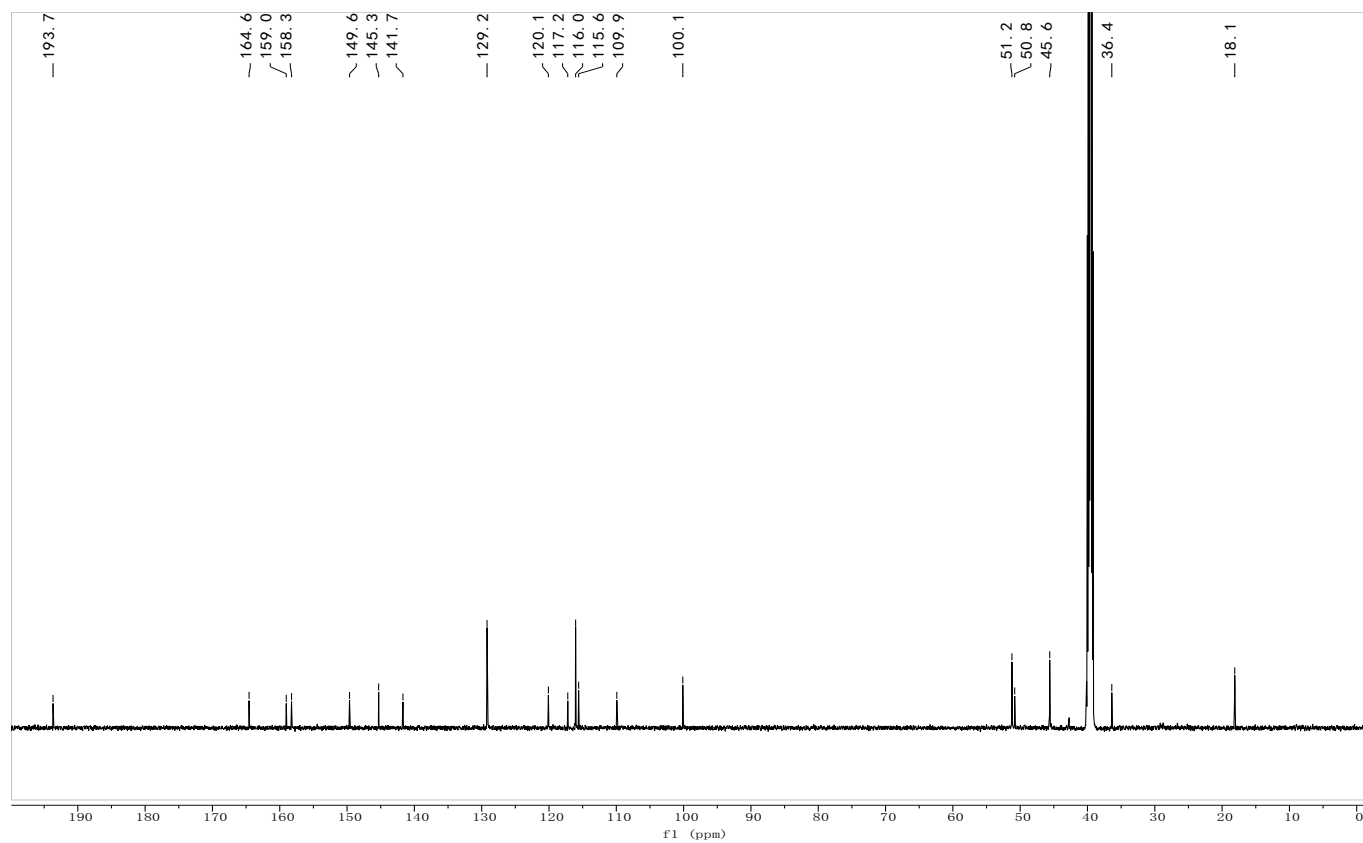

<sup>13</sup>C-NMR (150 MHz) spectrum of compound **16** in DMSO-*d*<sub>6</sub>

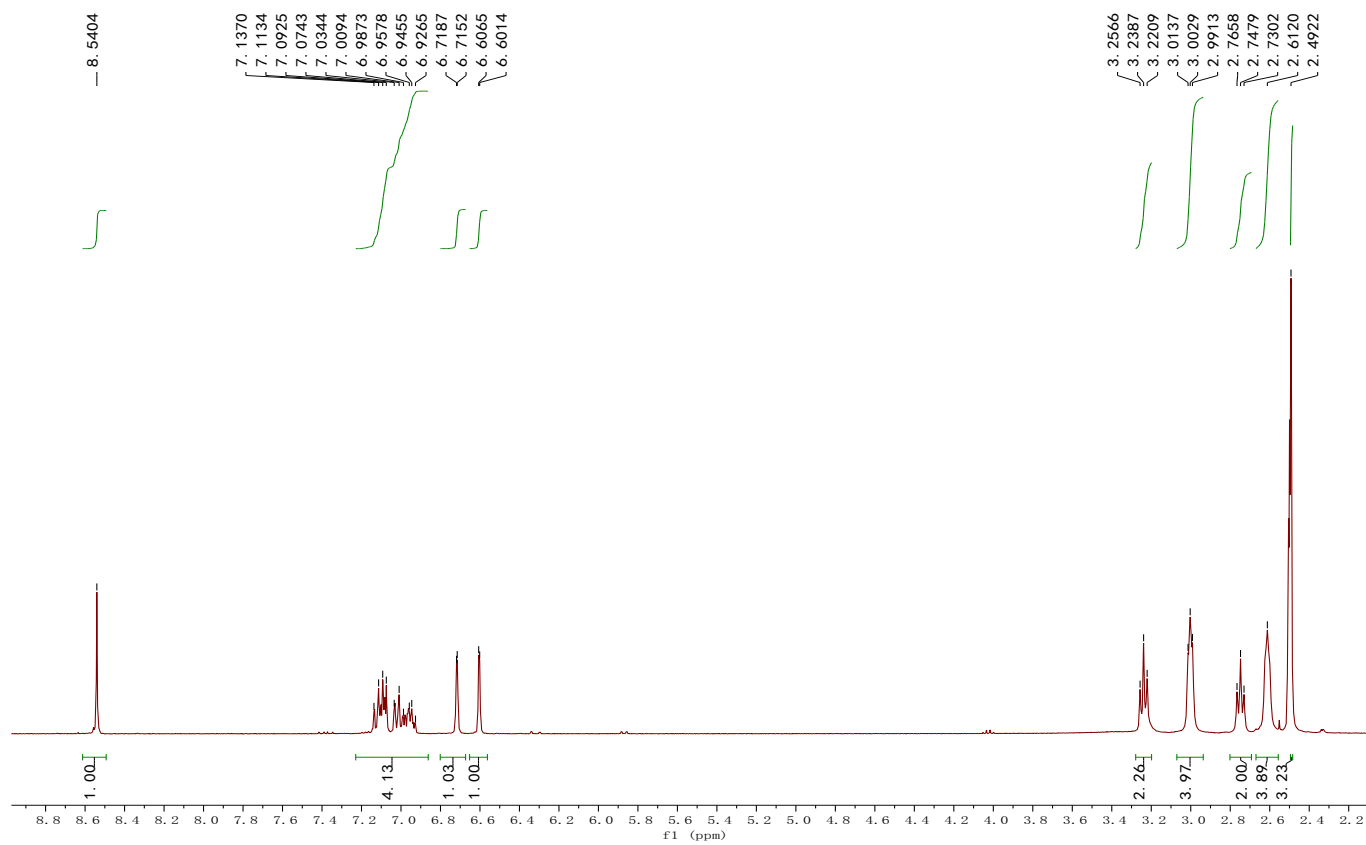

$^1\text{H-NMR}$  (400 MHz) spectrum of compound **17** in  $\text{DMSO-}d_6$

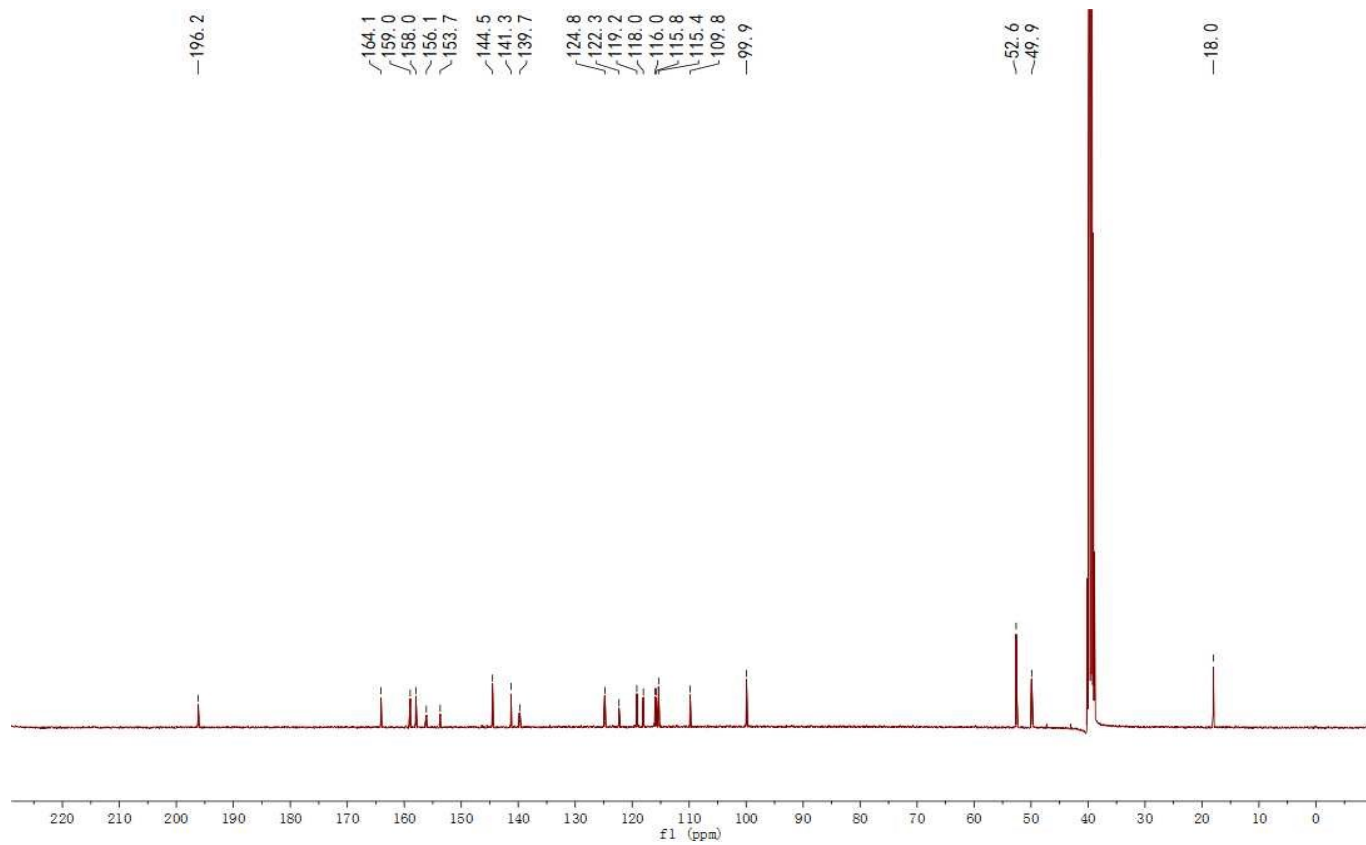

<sup>13</sup>C-NMR (100 MHz) spectrum of compound **17** in DMSO-*d*<sub>6</sub>

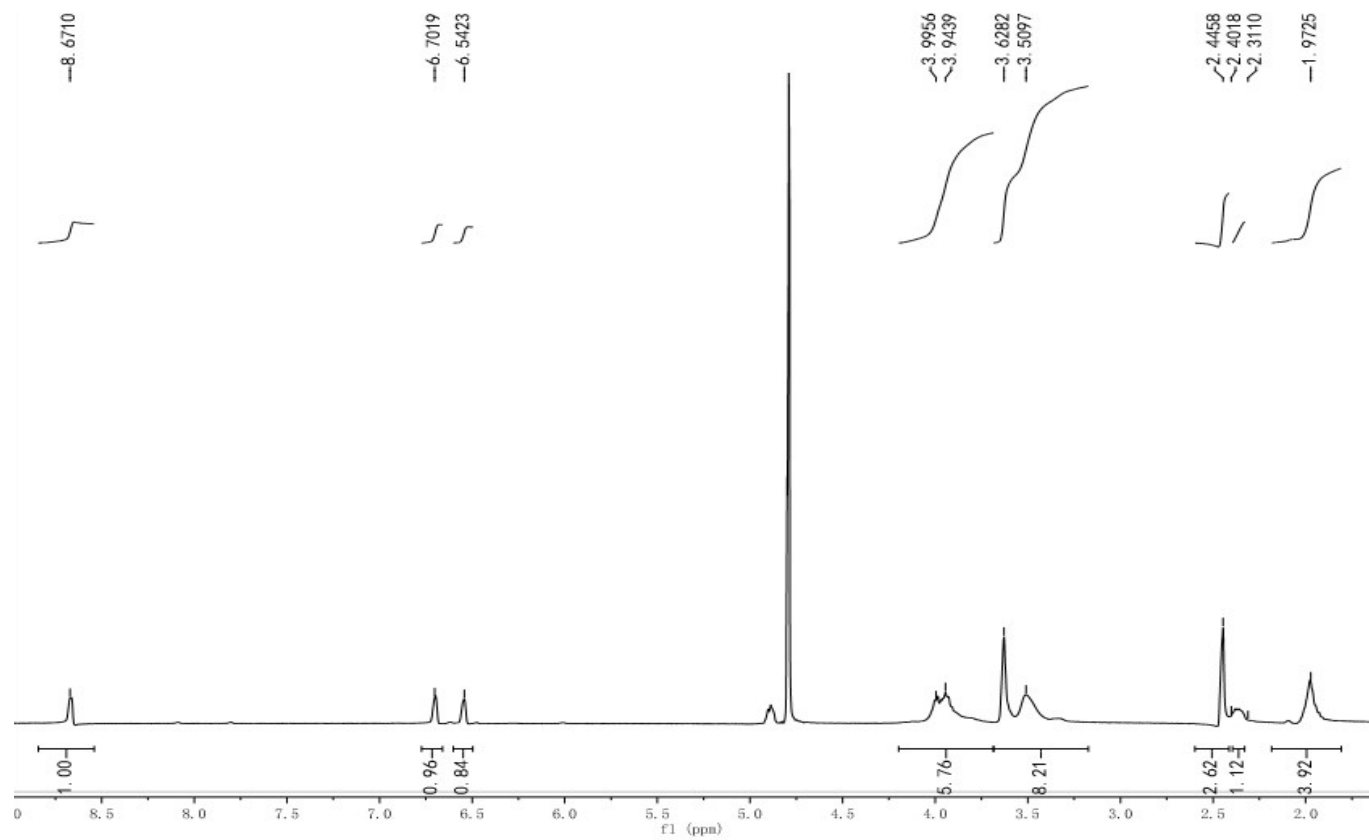

$^1\text{H-NMR}$  (400 MHz) spectrum of compound **18** in  $\text{D}_2\text{O}$

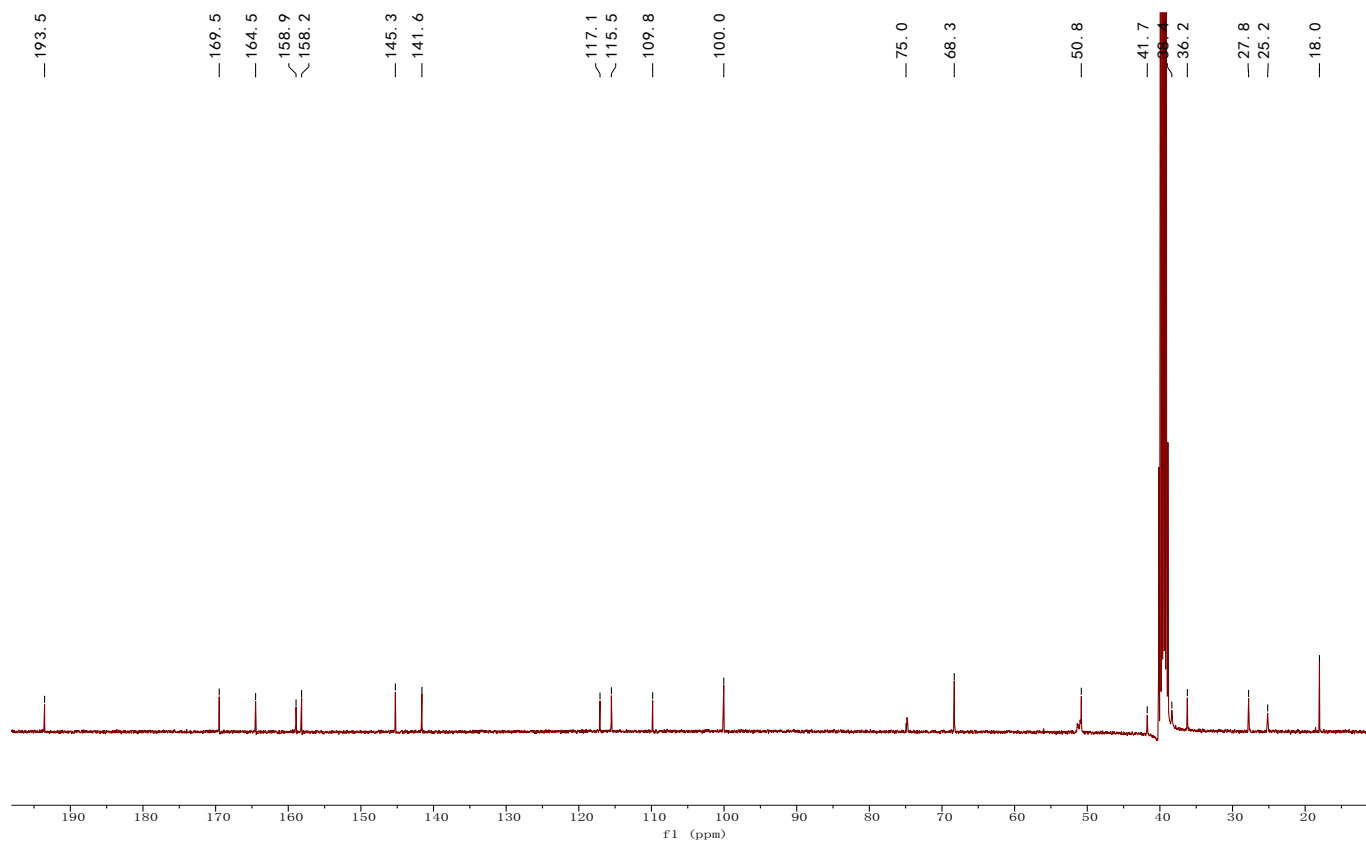

<sup>13</sup>C-NMR (100 MHz) spectrum of compound **18** in DMSO-*d*<sub>6</sub>

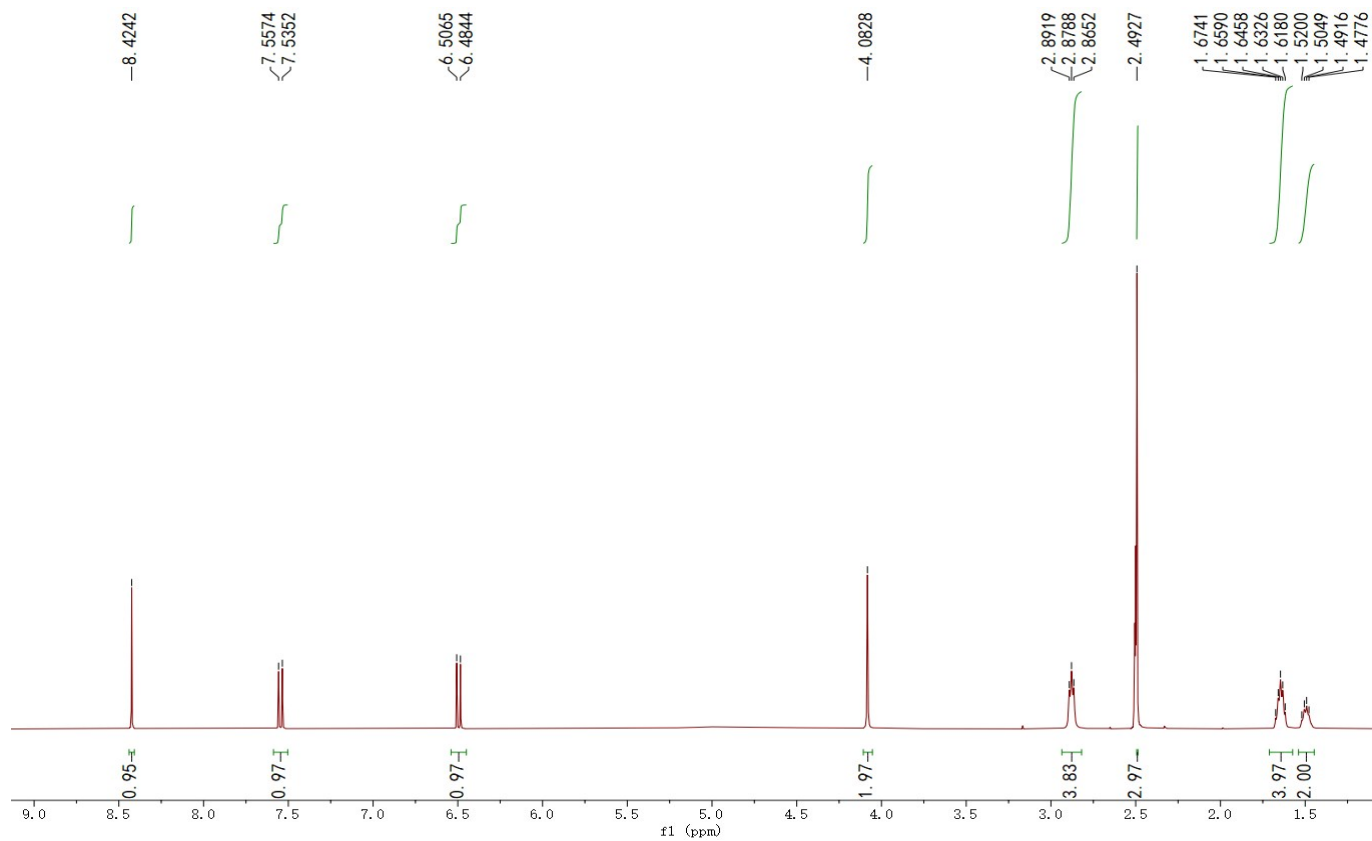

$^1\text{H-NMR}$  (400 MHz) spectrum of compound **19** in  $\text{DMSO-}d_6$



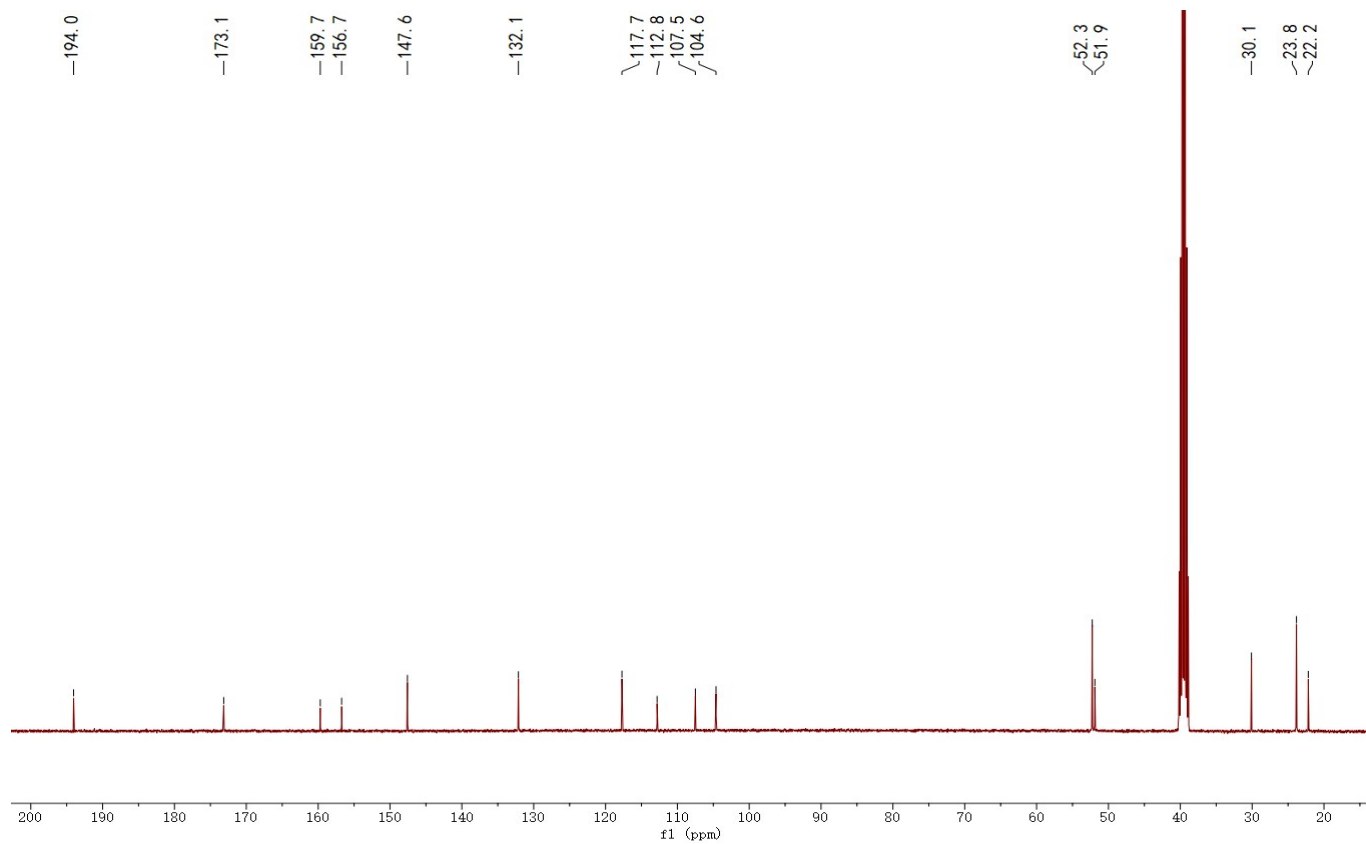

<sup>13</sup>C-NMR (125 MHz) spectrum of compound **19** in DMSO-*d*<sub>6</sub>

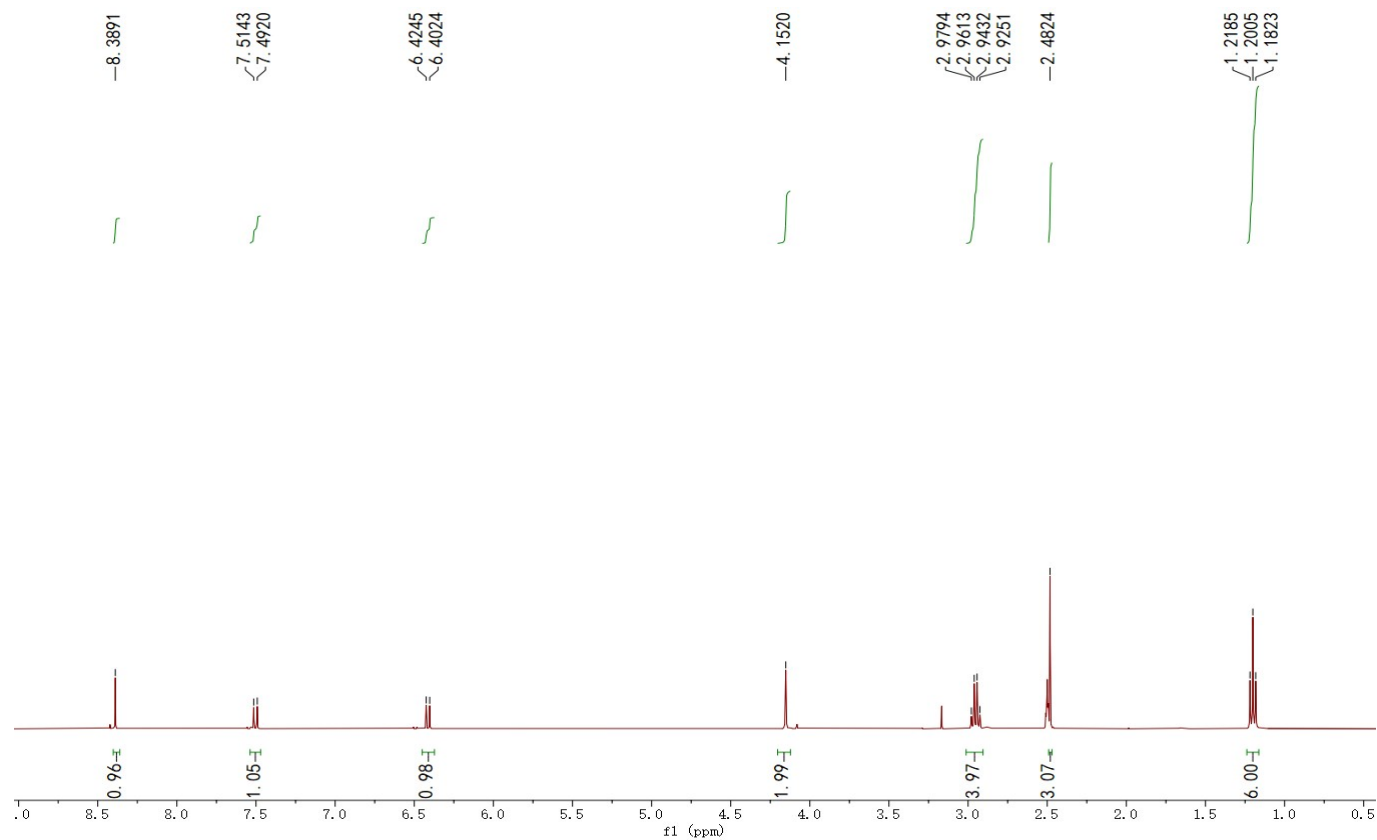

$^1\text{H-NMR}$  (400 MHz) spectrum of compound **20** in  $\text{DMSO-}d_6$

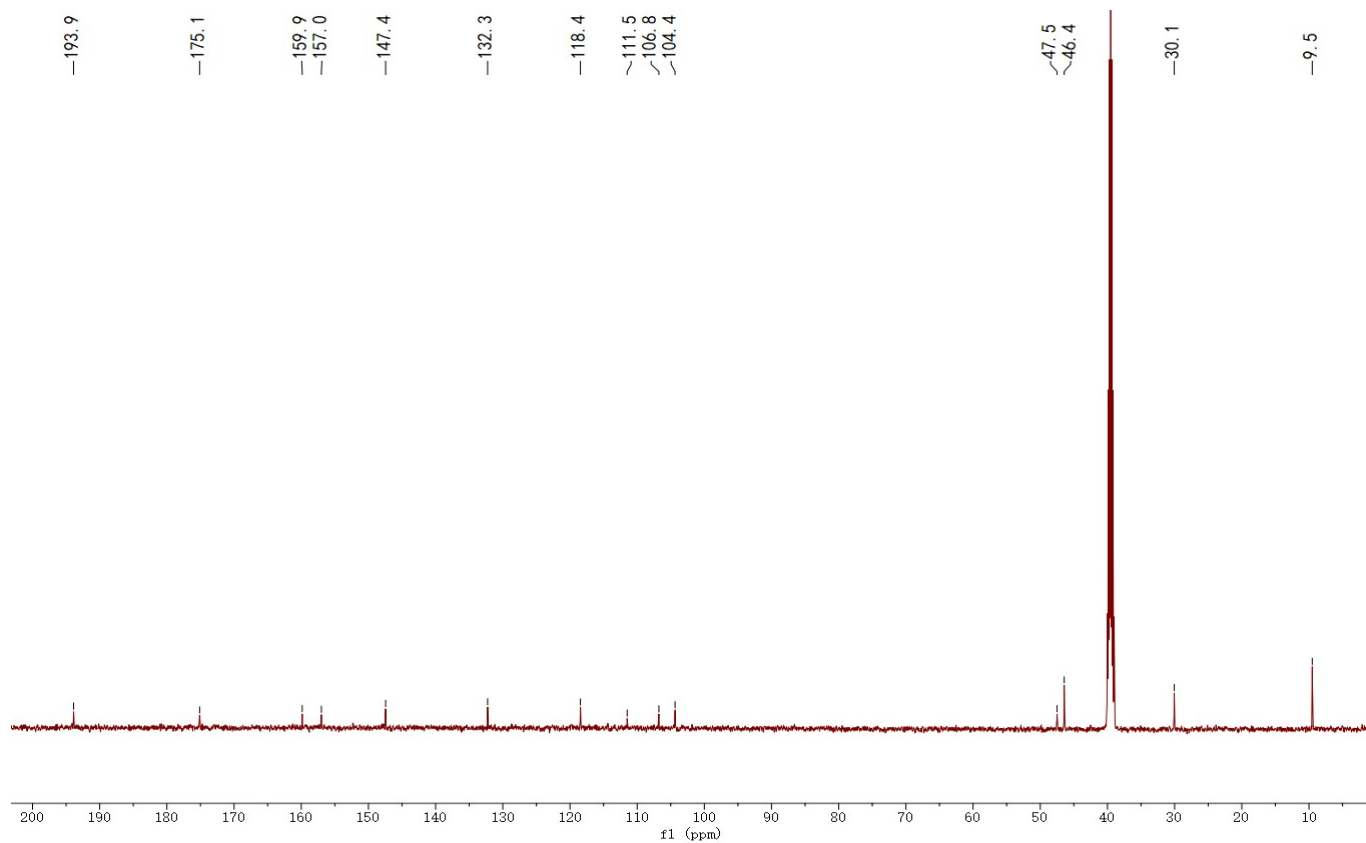

<sup>13</sup>C-NMR (100 MHz) spectrum of compound **20** in DMSO-*d*<sub>6</sub>

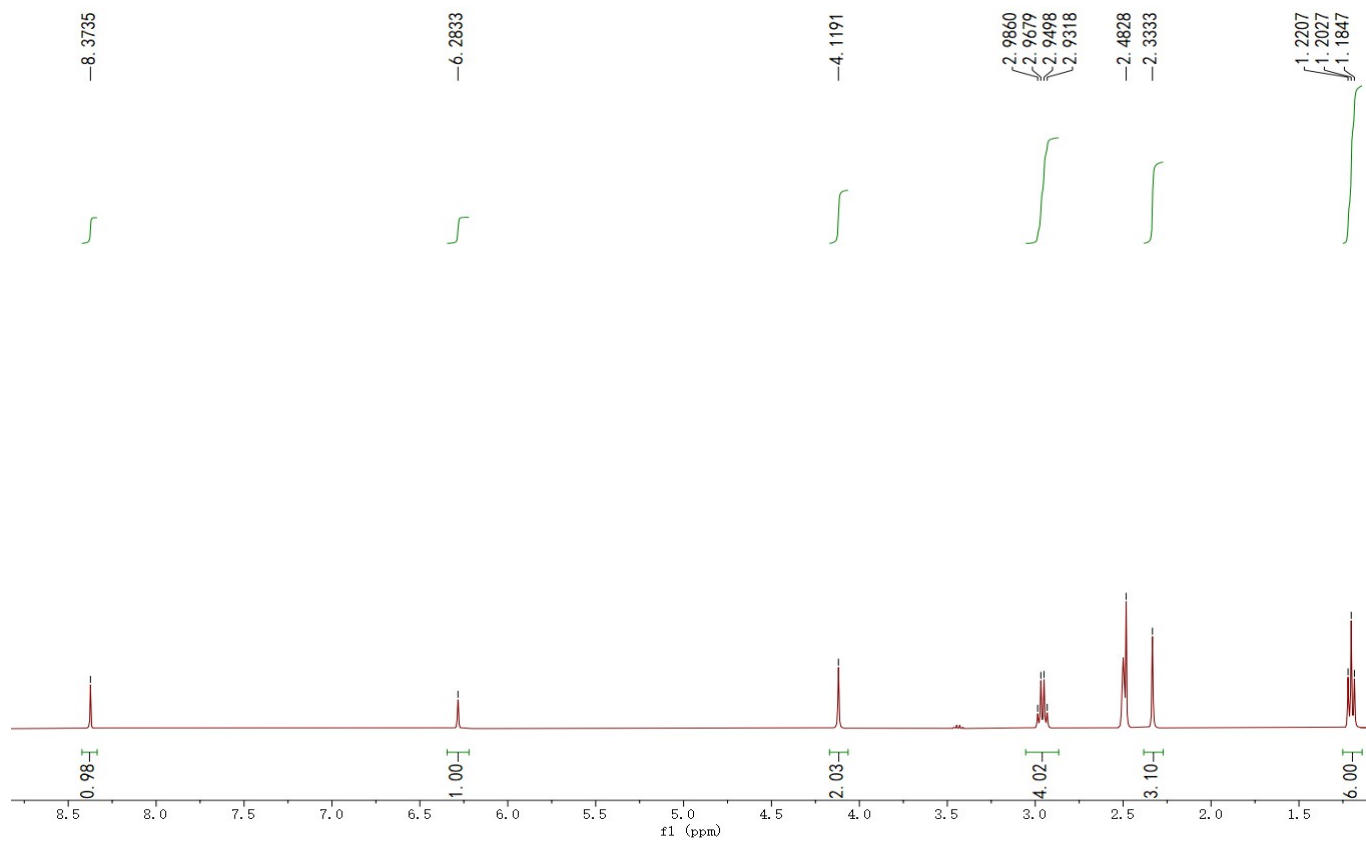

$^1\text{H-NMR}$  (400 MHz) spectrum of compound **21** in  $\text{DMSO-}d_6$

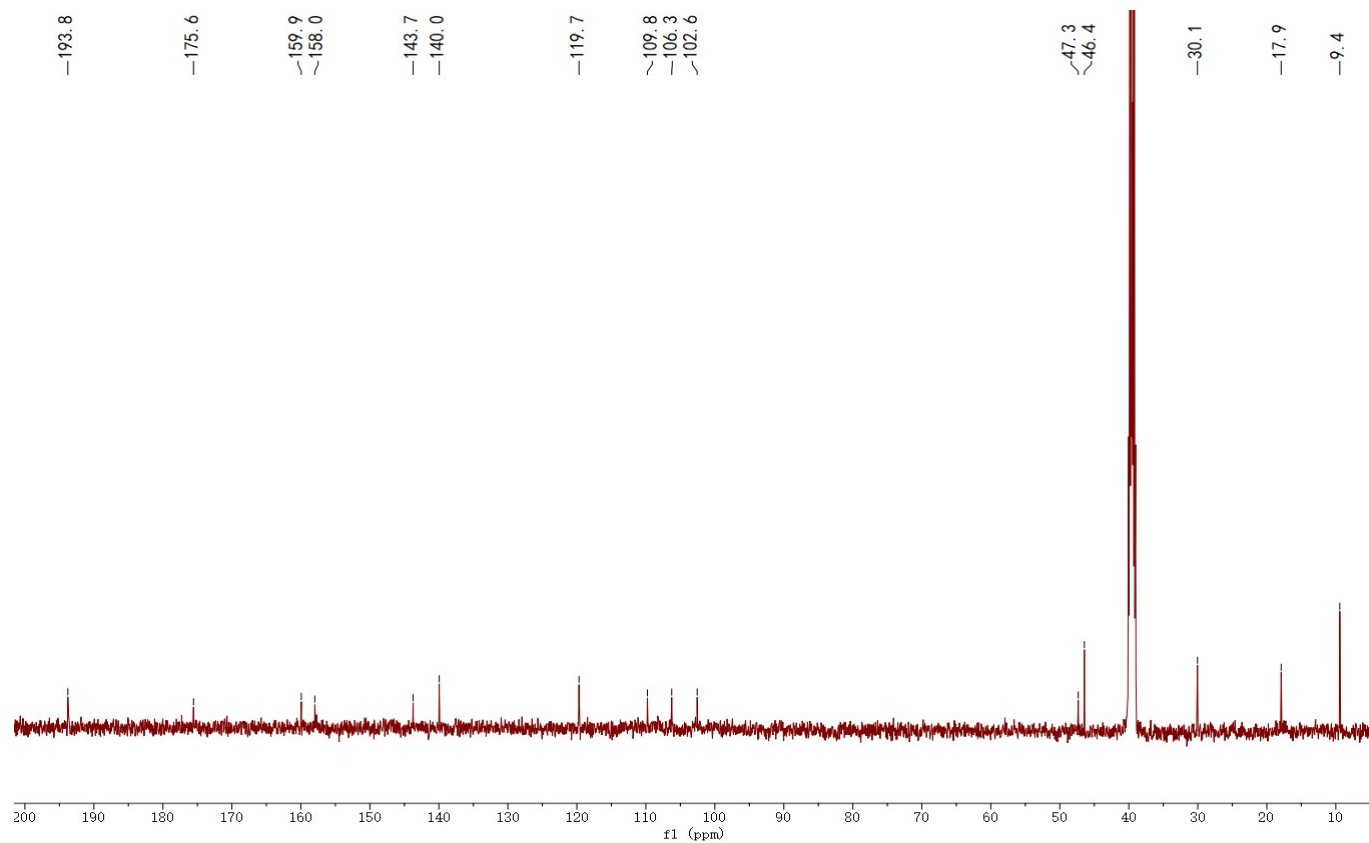

<sup>13</sup>C-NMR (125 MHz) spectrum of compound **21** in DMSO-*d*<sub>6</sub>

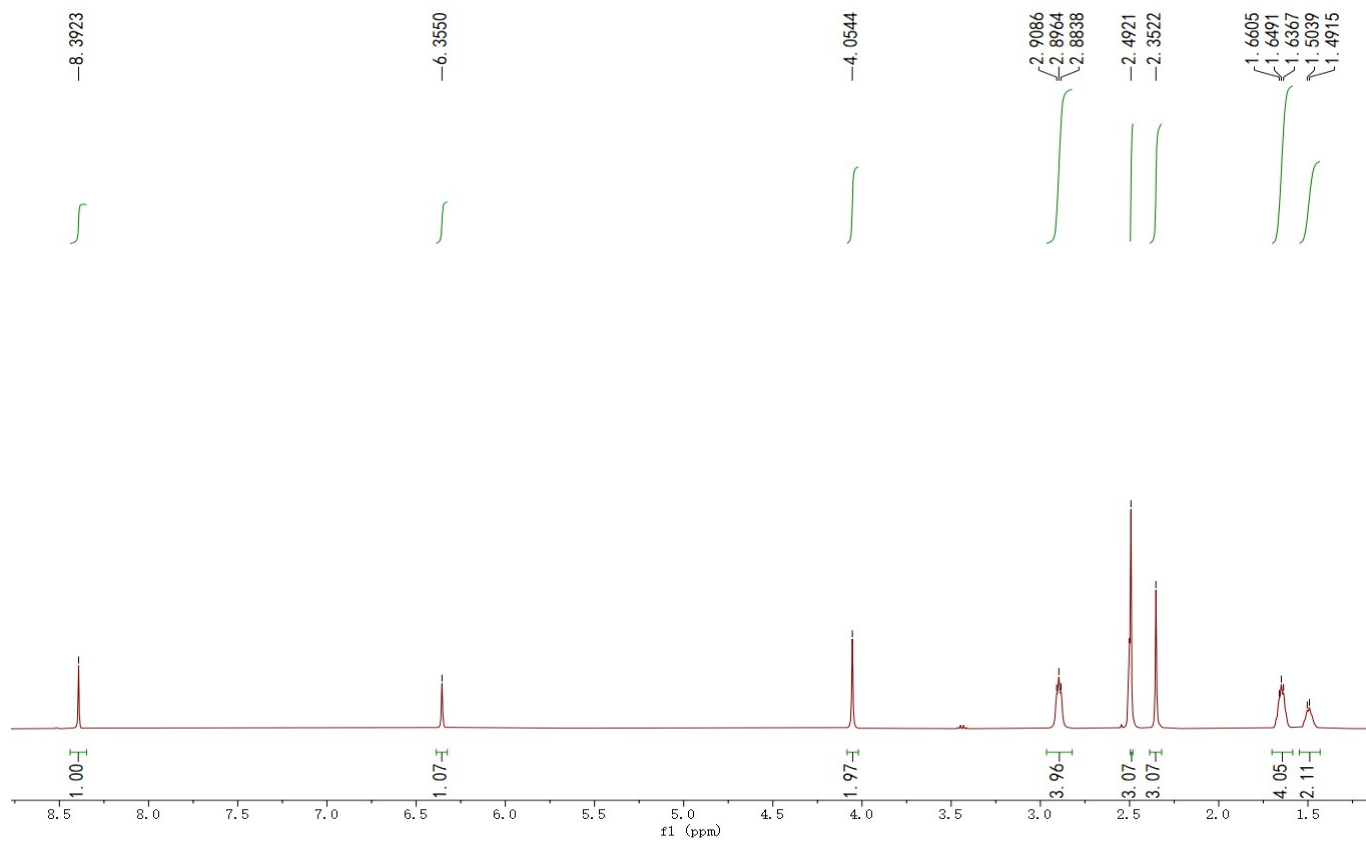

<sup>1</sup>H-NMR (400 MHz) spectrum of compound **22** in DMSO-*d*<sub>6</sub>

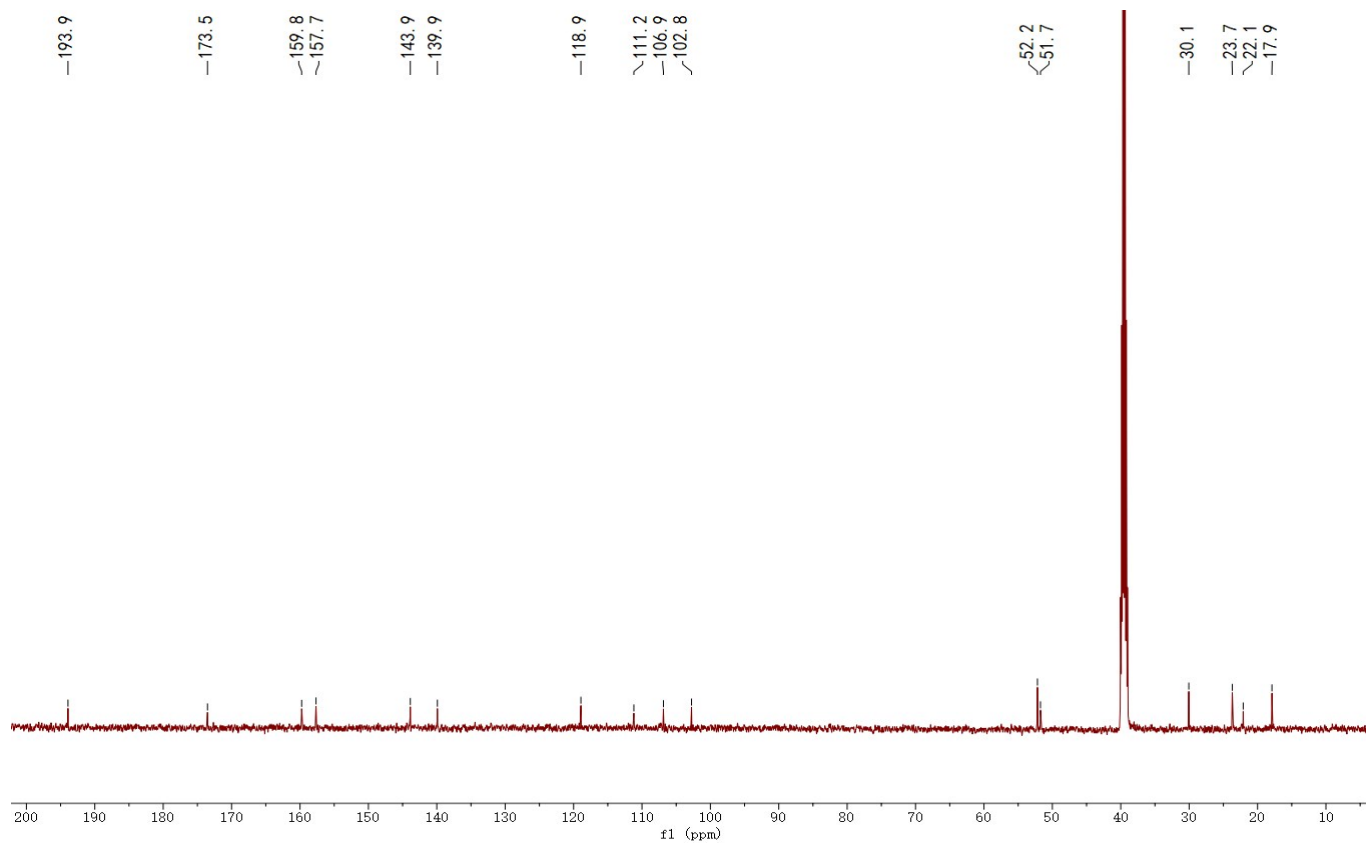

$^{13}\text{C}$ -NMR (125 MHz) spectrum of compound **22** in  $\text{DMSO-}d_6$

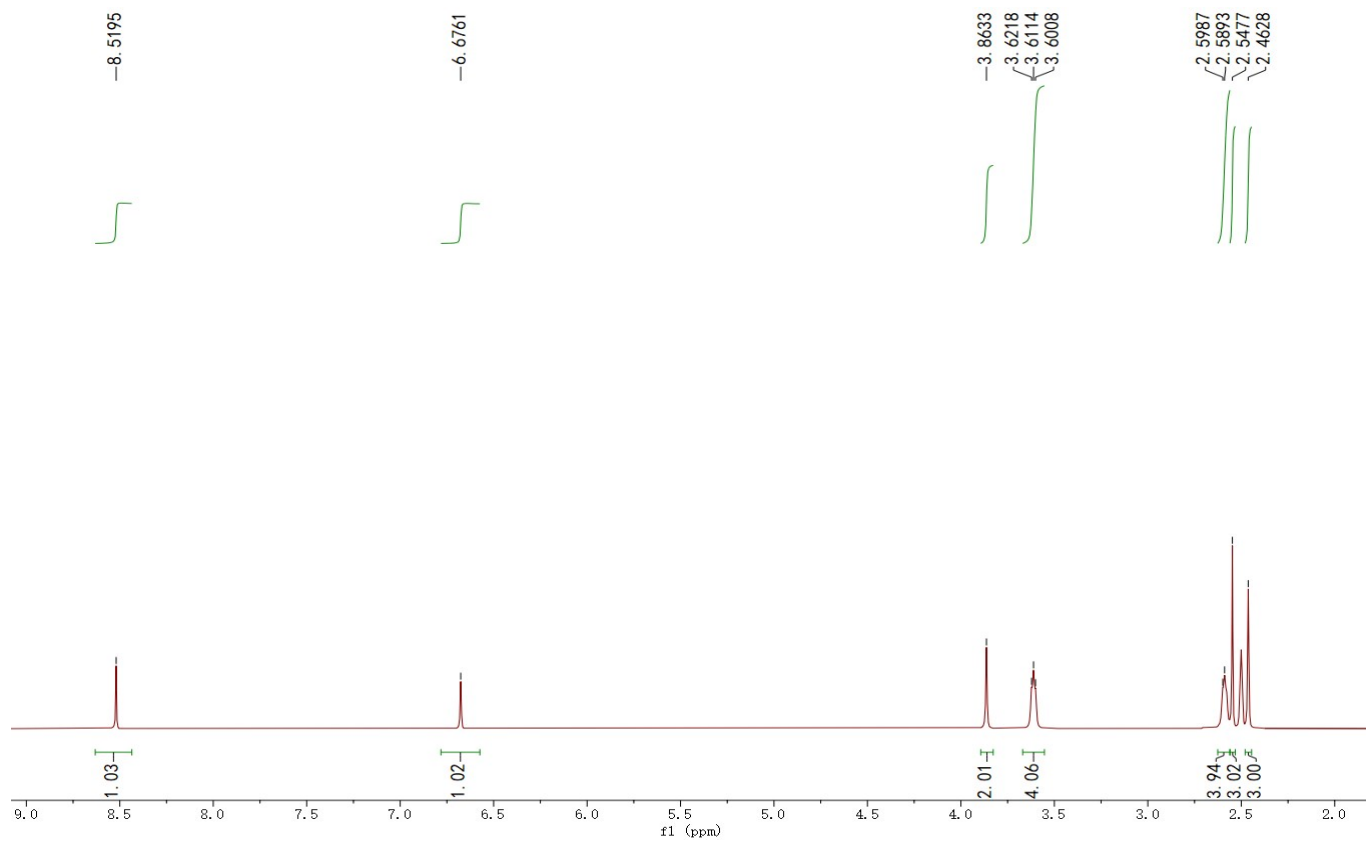

<sup>1</sup>H-NMR (400 MHz) spectrum of compound **23** in DMSO-*d*<sub>6</sub>



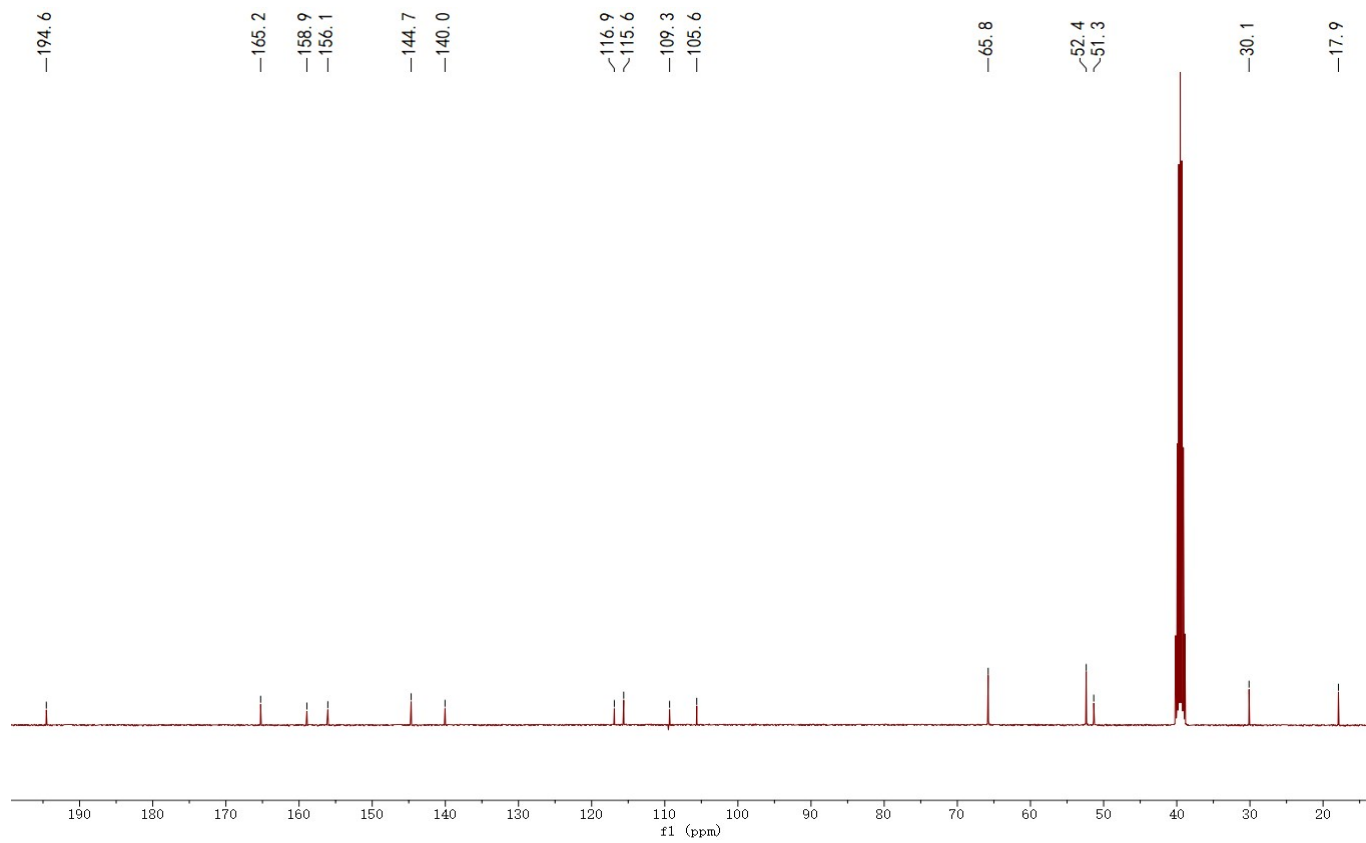

<sup>13</sup>C-NMR (100 MHz) spectrum of compound **23** in DMSO-*d*<sub>6</sub>

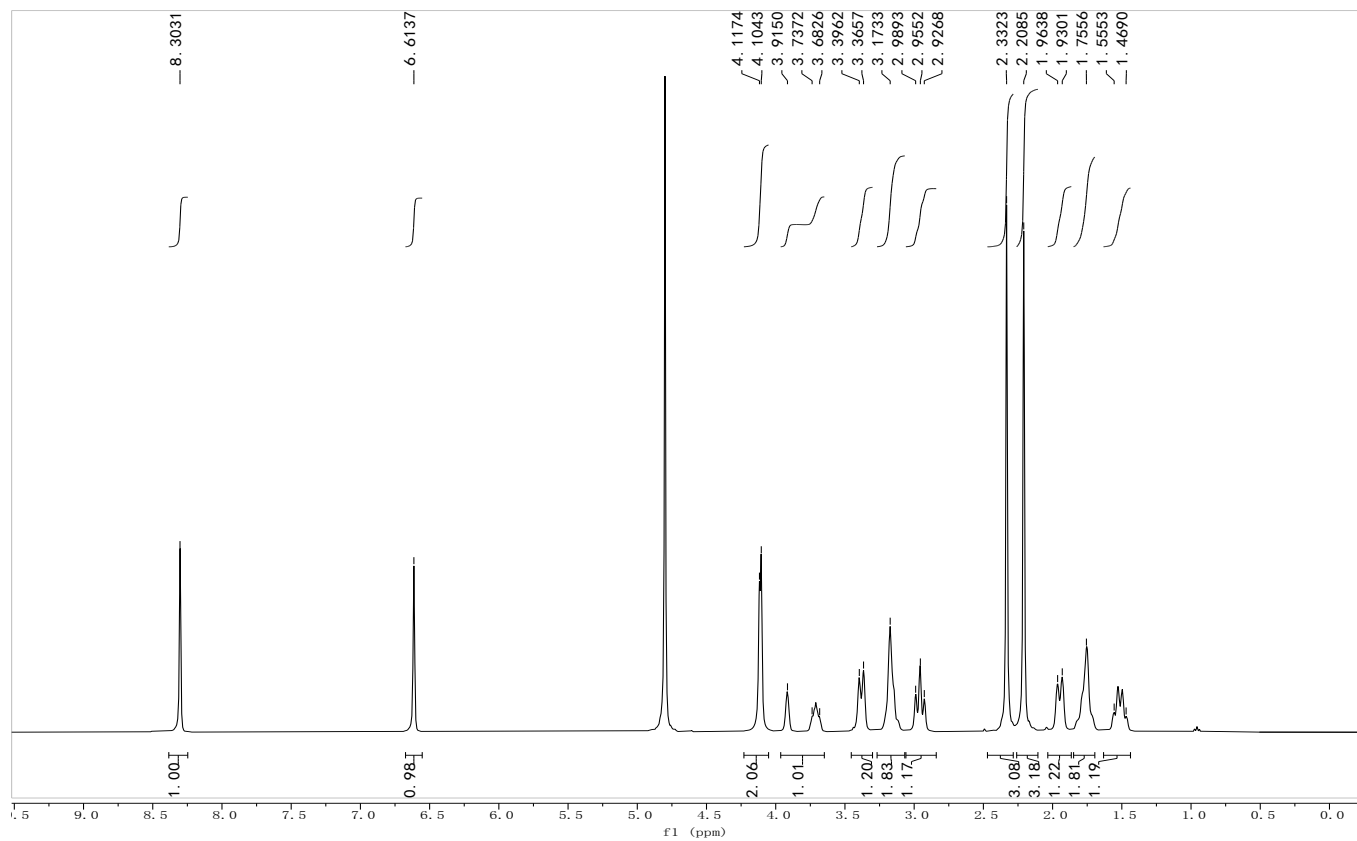

$^1\text{H-NMR}$  (500 MHz) spectrum of compound **24** in  $\text{D}_2\text{O}$  and  $\text{CF}_3\text{COOD}$

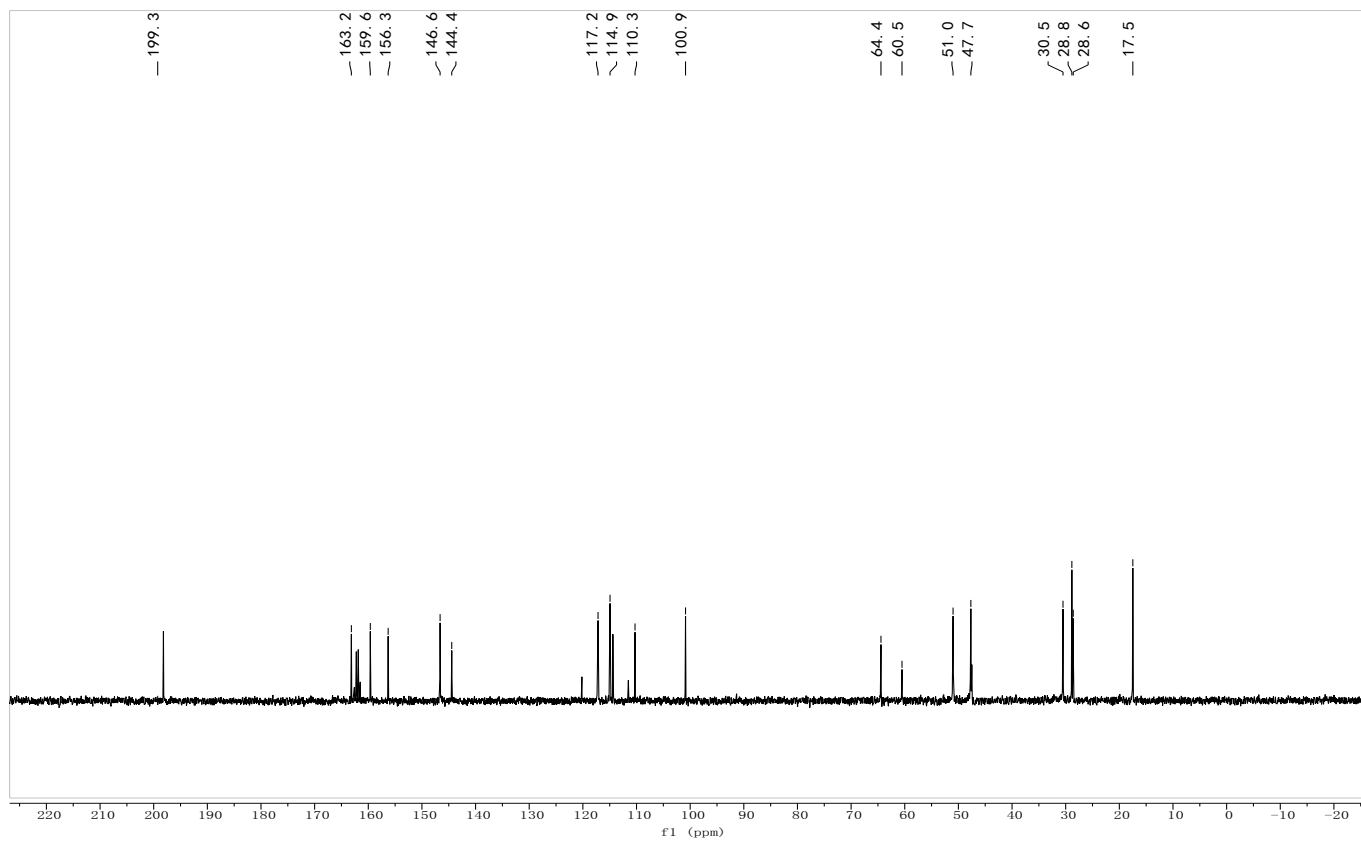

$^{13}\text{C}$ -NMR (125 MHz) spectrum of compound **24** in  $\text{D}_2\text{O}$  and  $\text{CF}_3\text{COOD}$

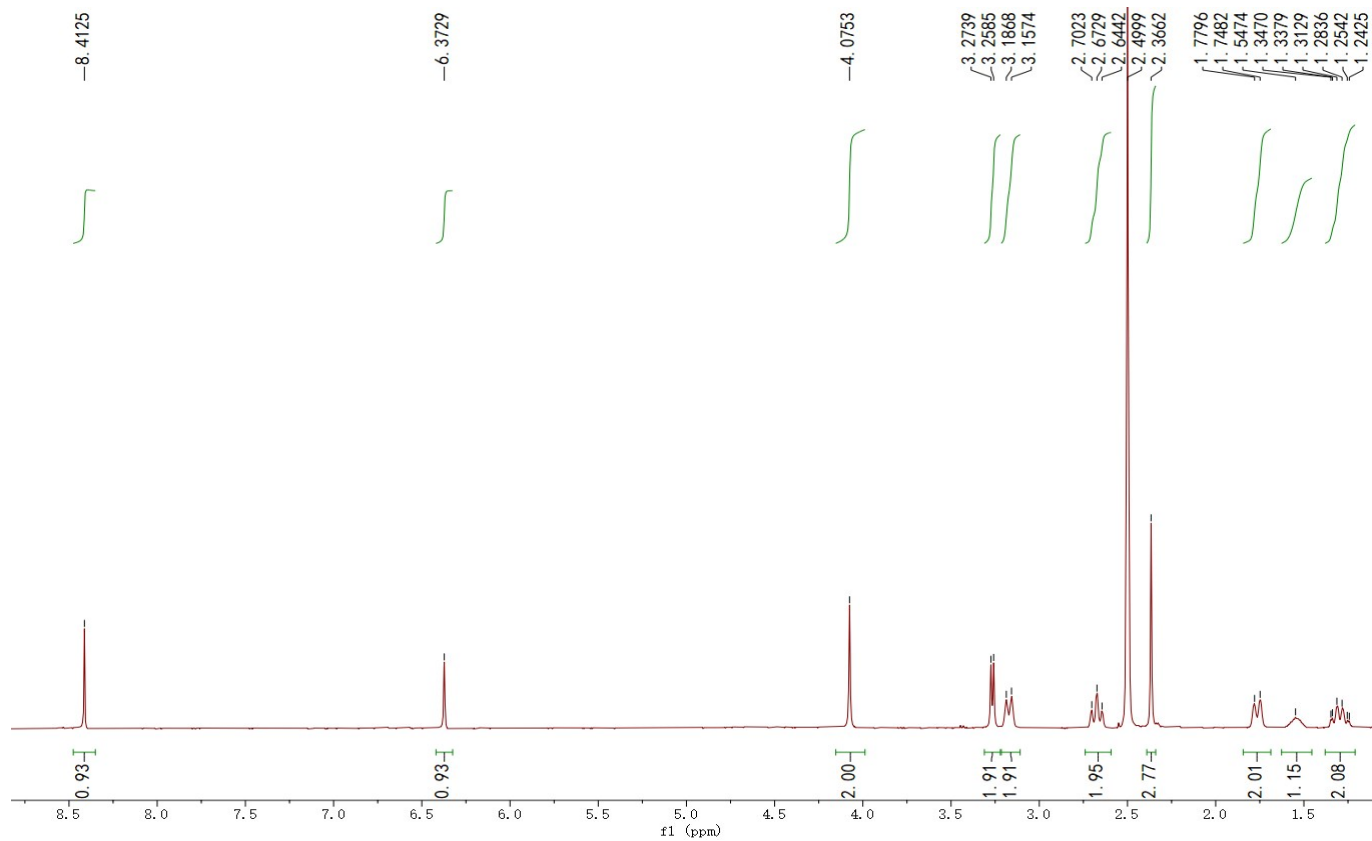

$^1\text{H-NMR}$  (400 MHz) spectrum of compound **25** in  $\text{DMSO-}d_6$

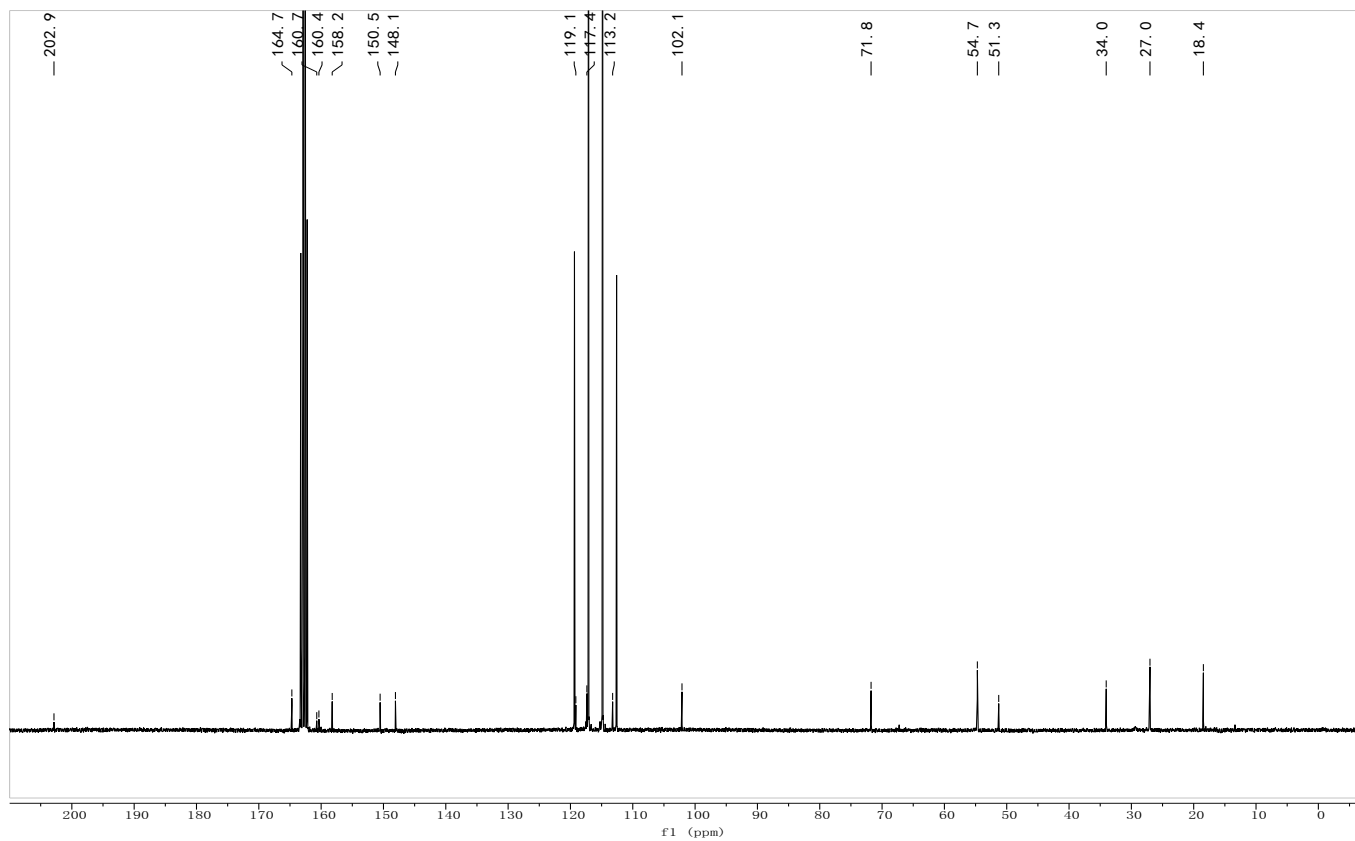

$^{13}\text{C}$ -NMR (125 MHz) spectrum of compound **25** in  $\text{D}_2\text{O}$  and  $\text{CF}_3\text{COOD}$

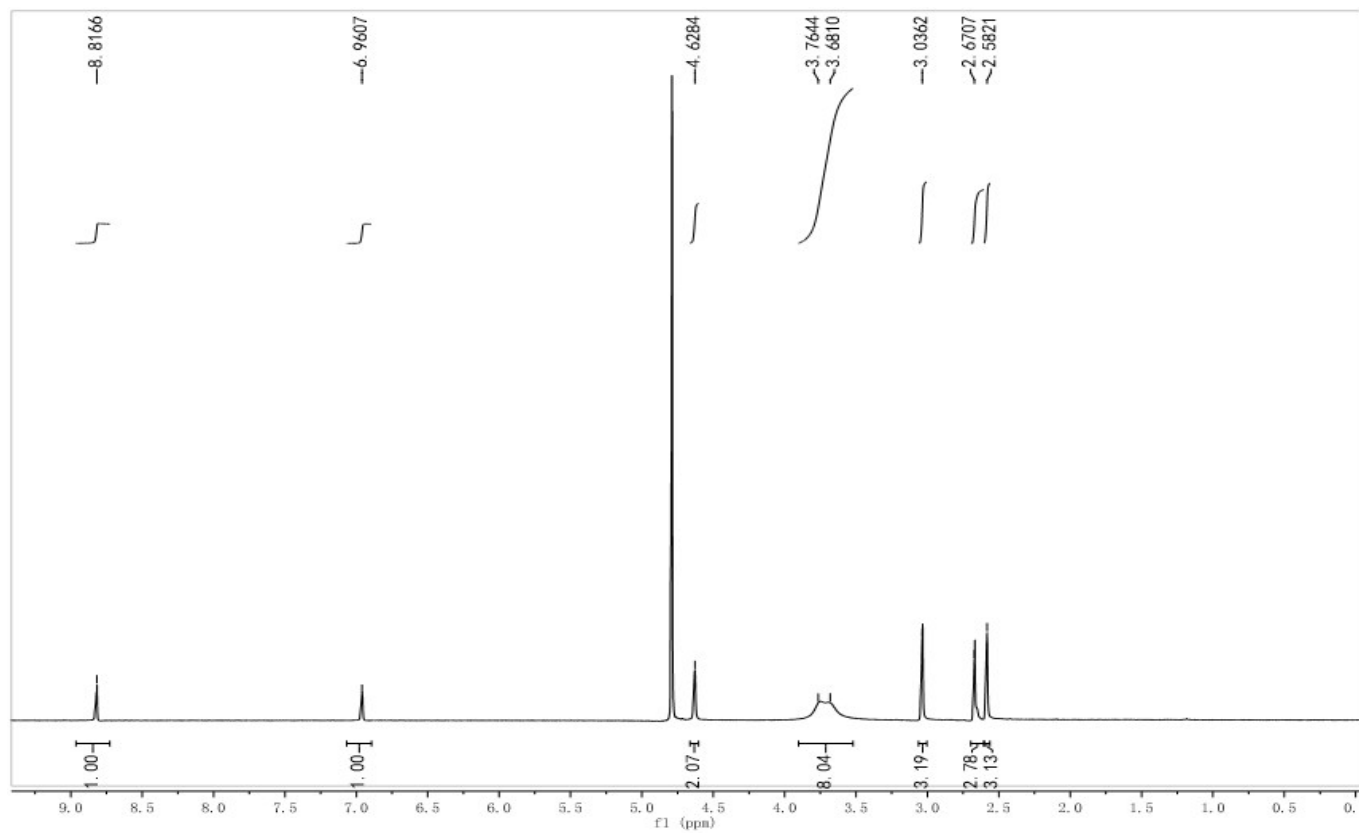

$^1\text{H-NMR}$  (400 MHz) spectrum of compound **26** in  $\text{D}_2\text{O}$

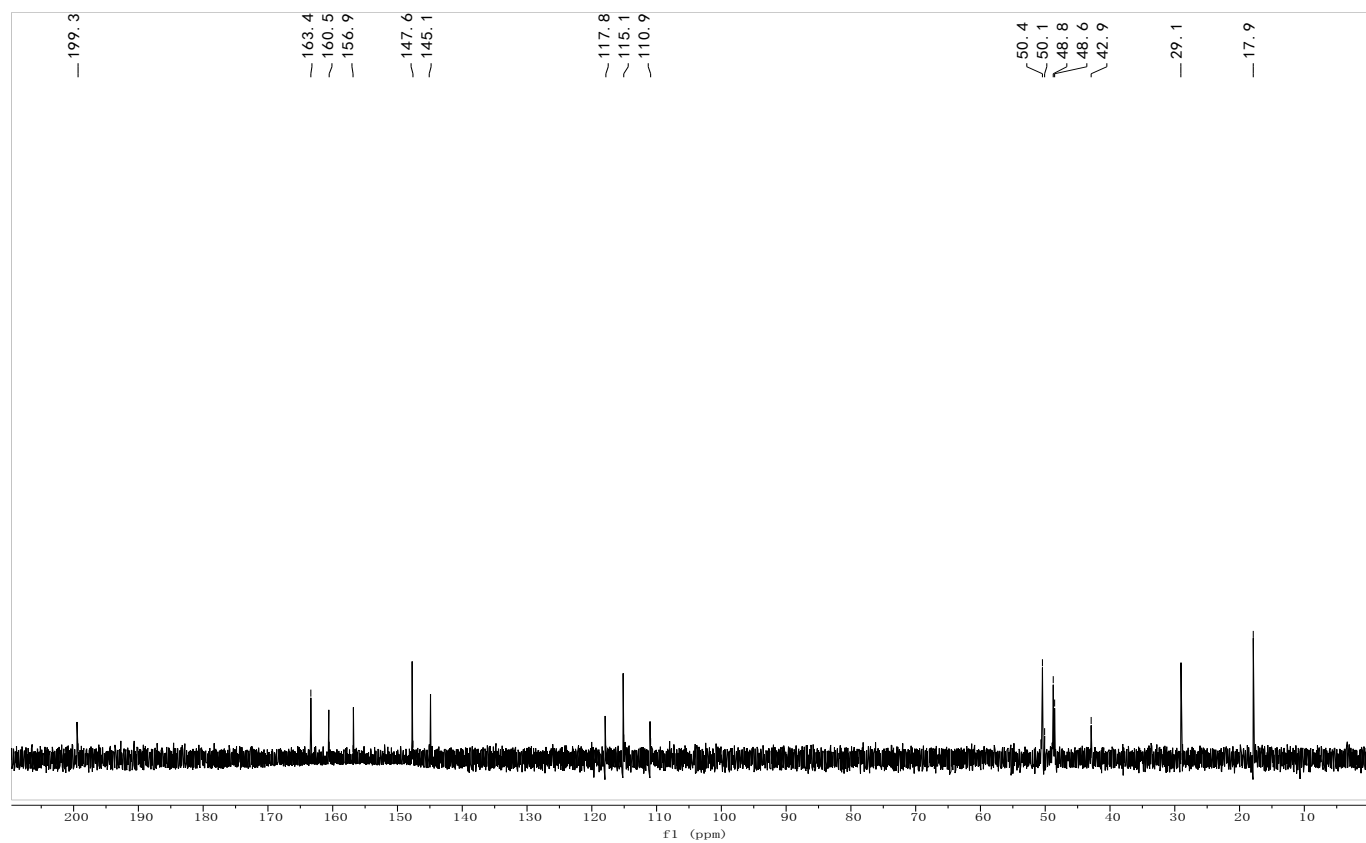

$^{13}\text{C}$ -NMR (125 MHz) spectrum of compound **26** in  $\text{D}_2\text{O}$

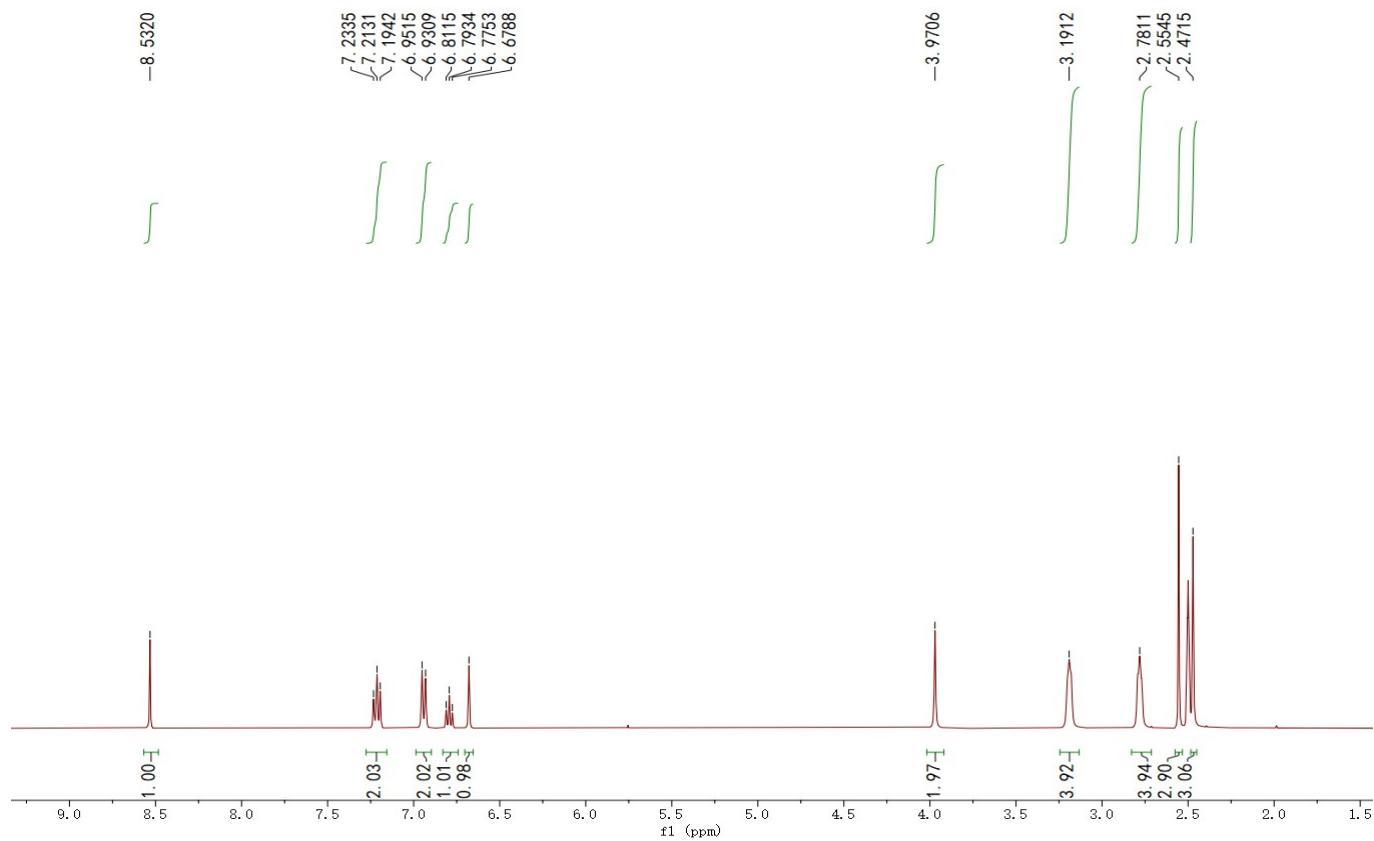

$^1\text{H-NMR}$  (400 MHz) spectrum of compound **27** in  $\text{DMSO-}d_6$



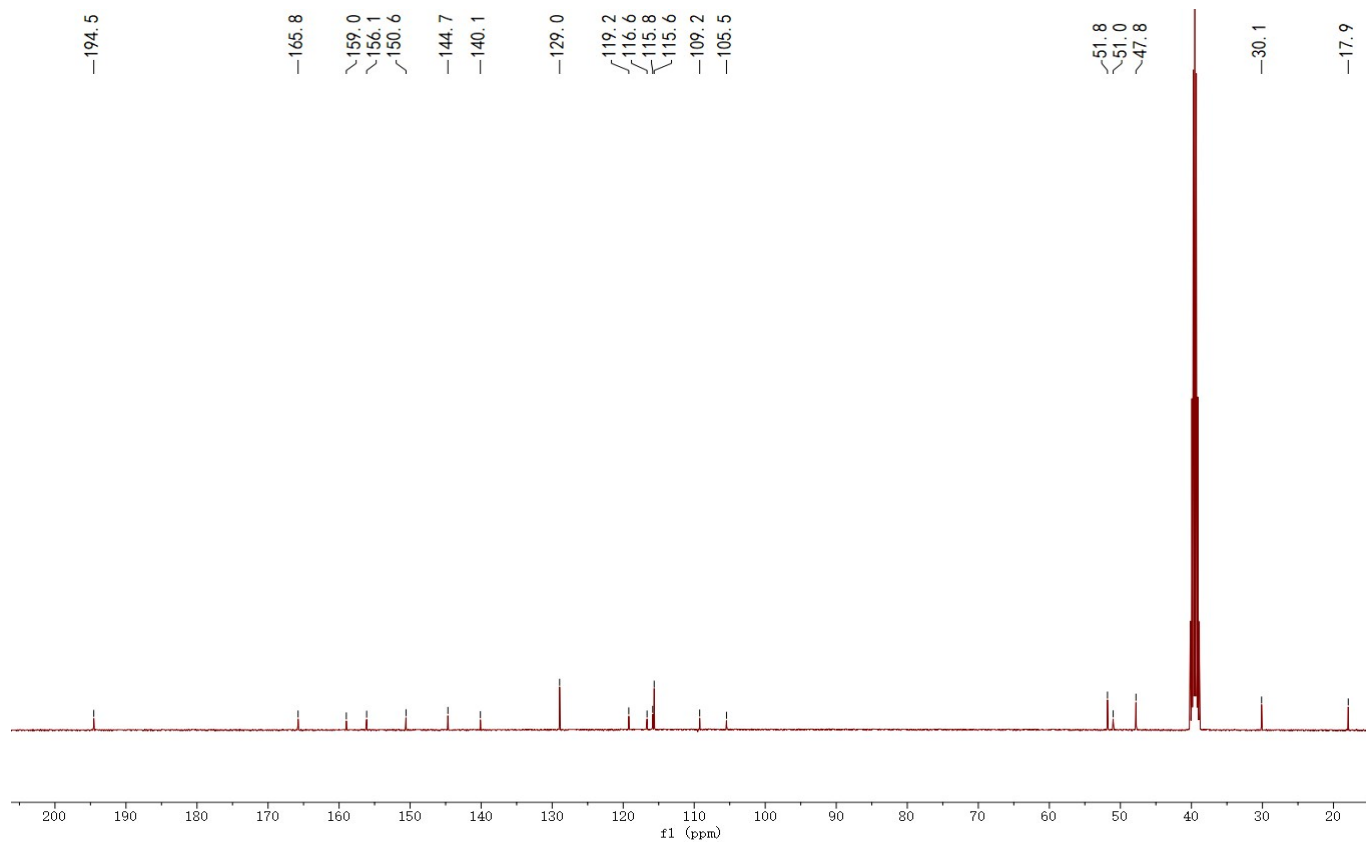

<sup>13</sup>C-NMR (100 MHz) spectrum of compound **27** in DMSO-*d*<sub>6</sub>

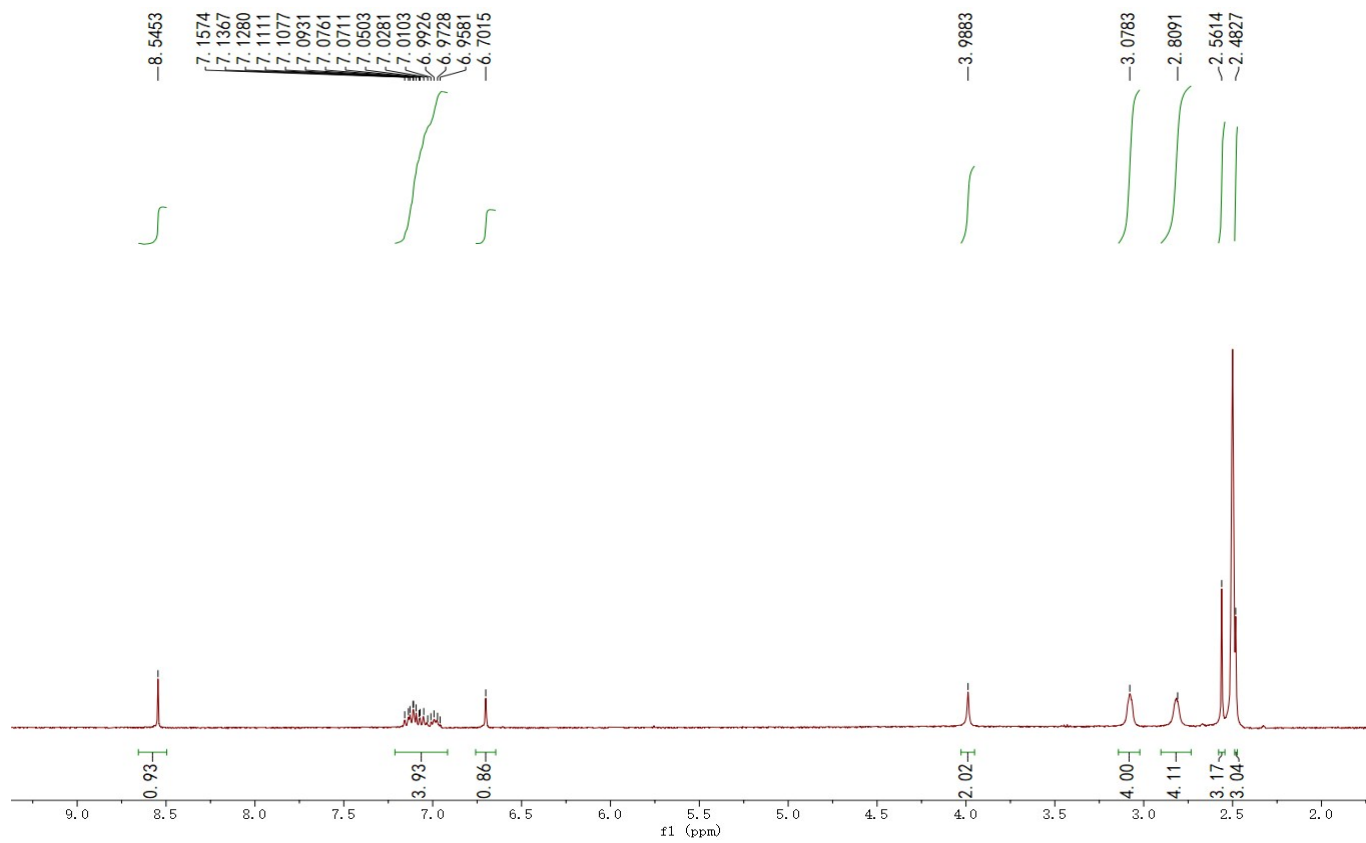

<sup>1</sup>H-NMR (400 MHz) spectrum of compound **28** in DMSO-*d*<sub>6</sub>

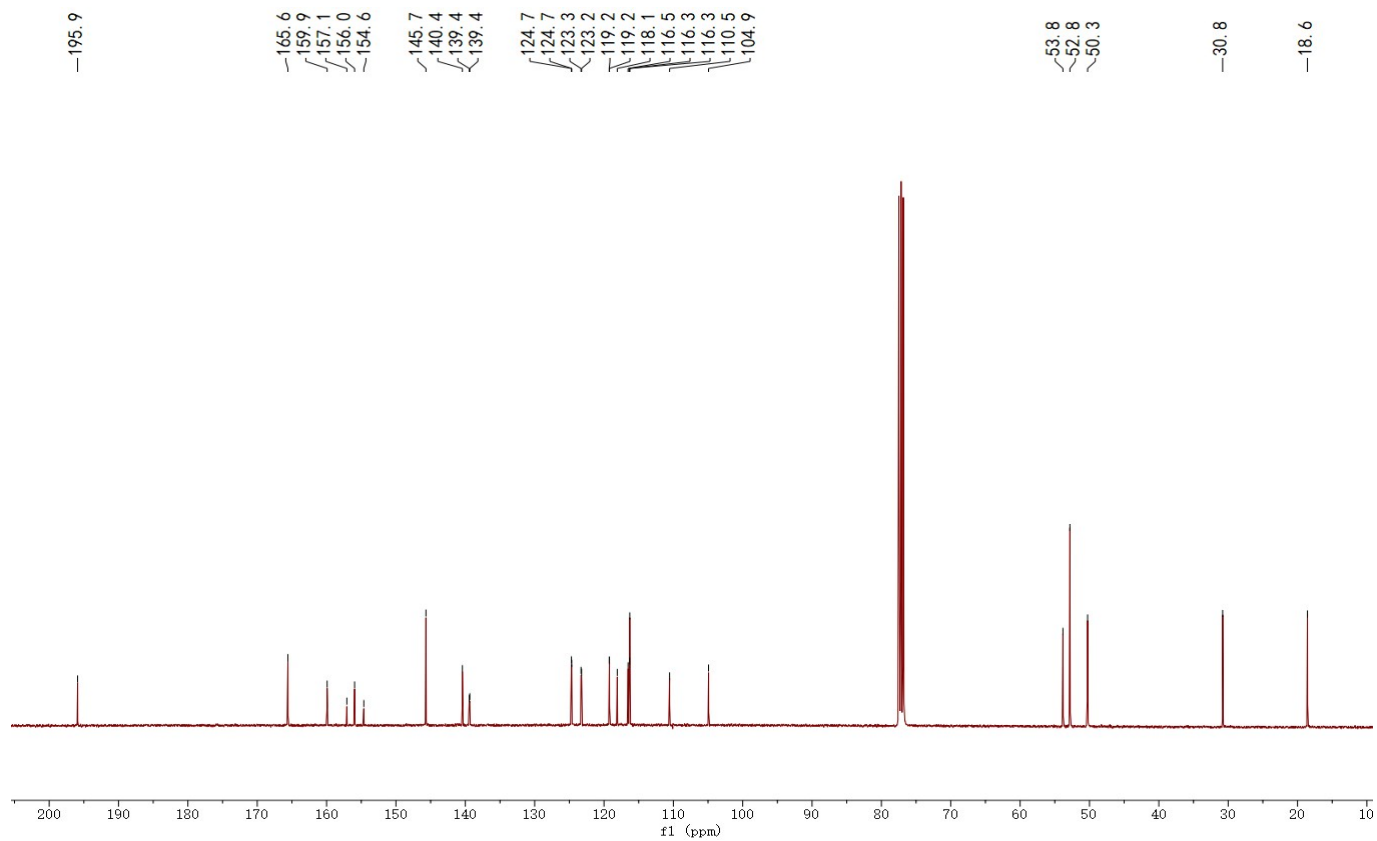

$^{13}\text{C}$ -NMR (100 MHz) spectrum of compound **28** in chloroform-*d*

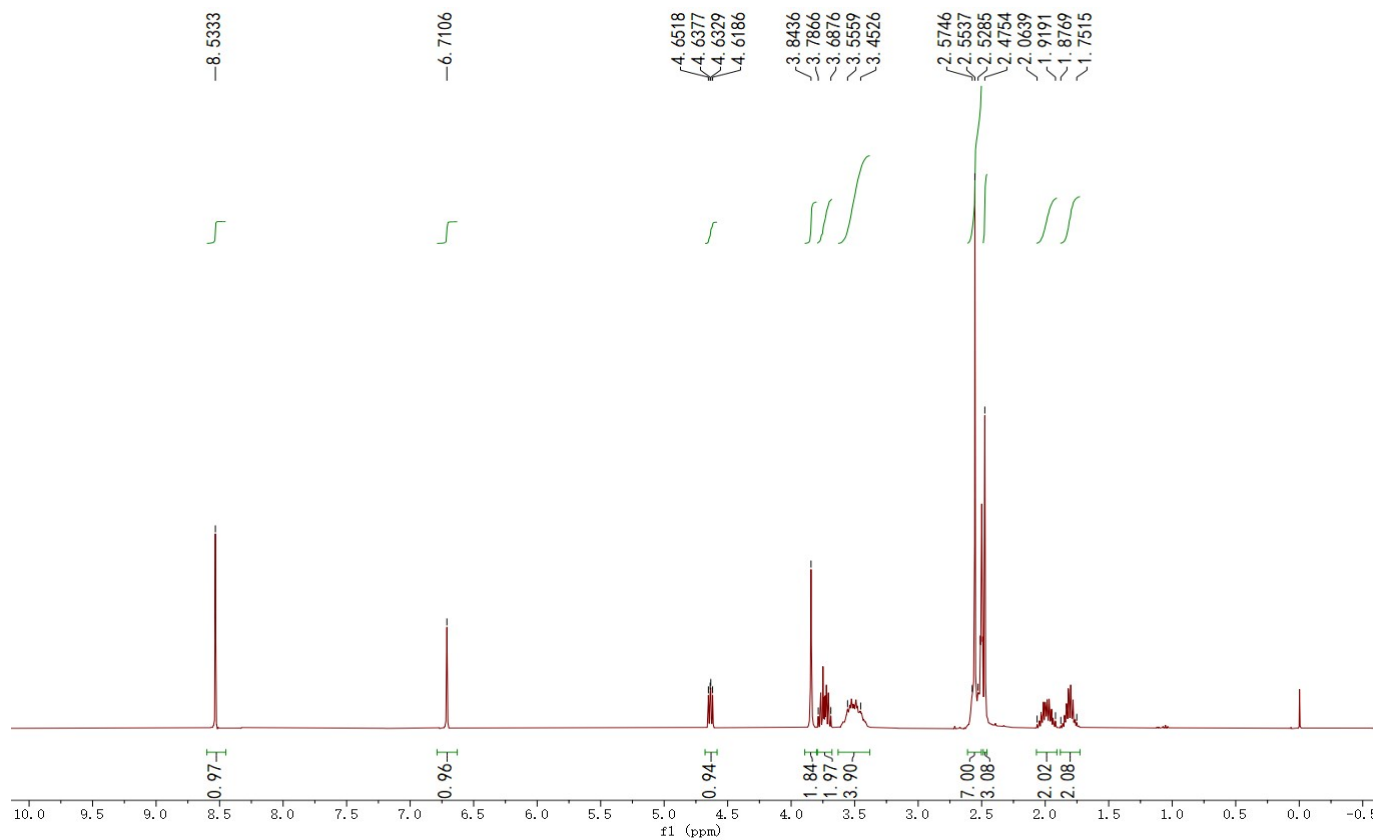

$^1\text{H-NMR}$  (400 MHz) spectrum of compound **29** in  $\text{DMSO-}d_6$

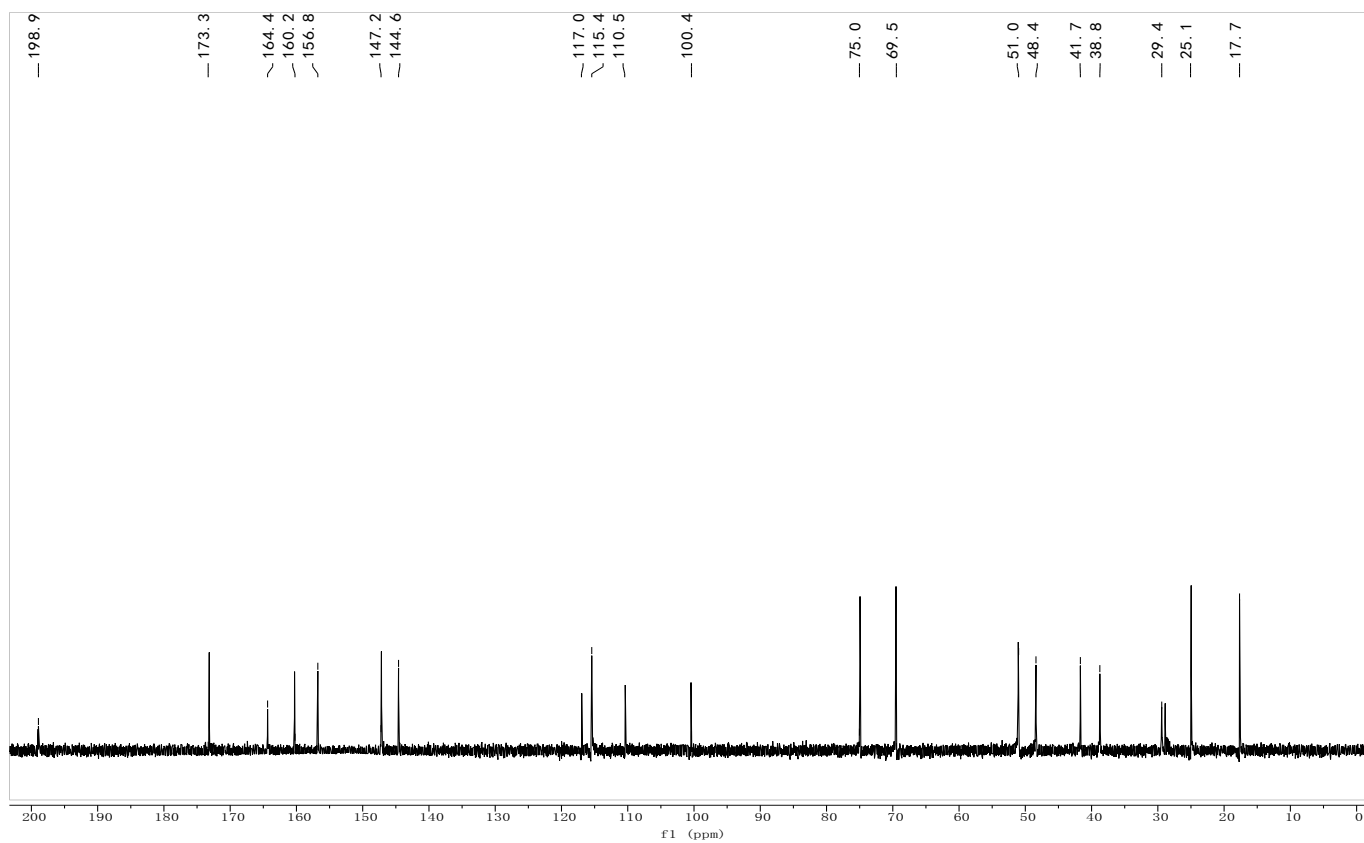

$^{13}\text{C}$ -NMR (125 MHz) spectrum of compound **29** in  $\text{D}_2\text{O}$

## 2. ESI-HRMS spectra of compounds 8-29.

8 #691 RT: 2.54 AV: 1 NL: 1.65E8  
T: FTMS + c ESI Full ms [100.00-1000.00]

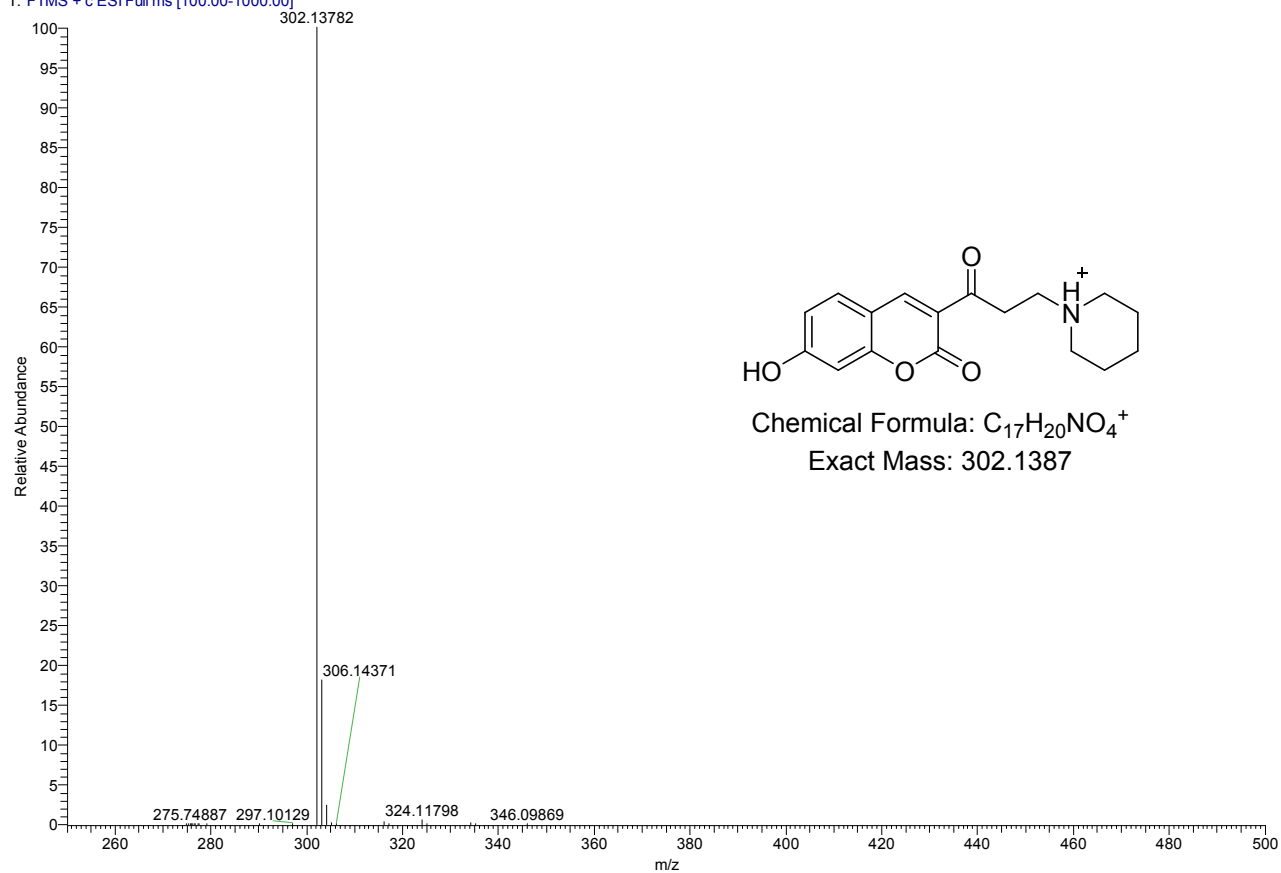

ESI-HRMS spectrum of compound **8**

6 #647 RT: 2.40 AV: 1 NL: 1.36E7  
T: FTMS + c ESI Full ms [100.00-1000.00]

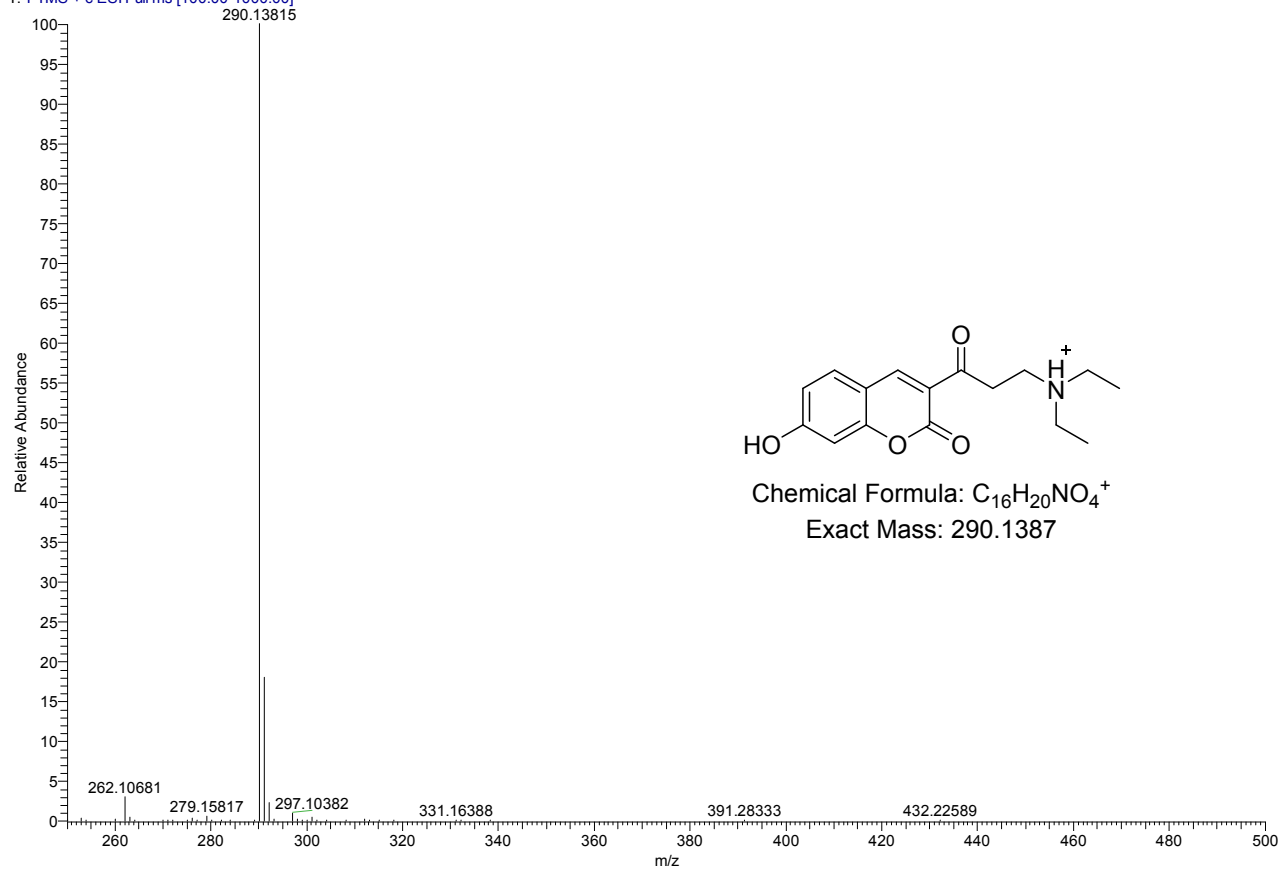

ESI-HRMS spectrum of compound **9**

CMB-A3 #842 RT: 2.59 AV: 1 NL: 2.69E9  
T: FTMS + c ESI Full ms [100.0000-1000.0000]

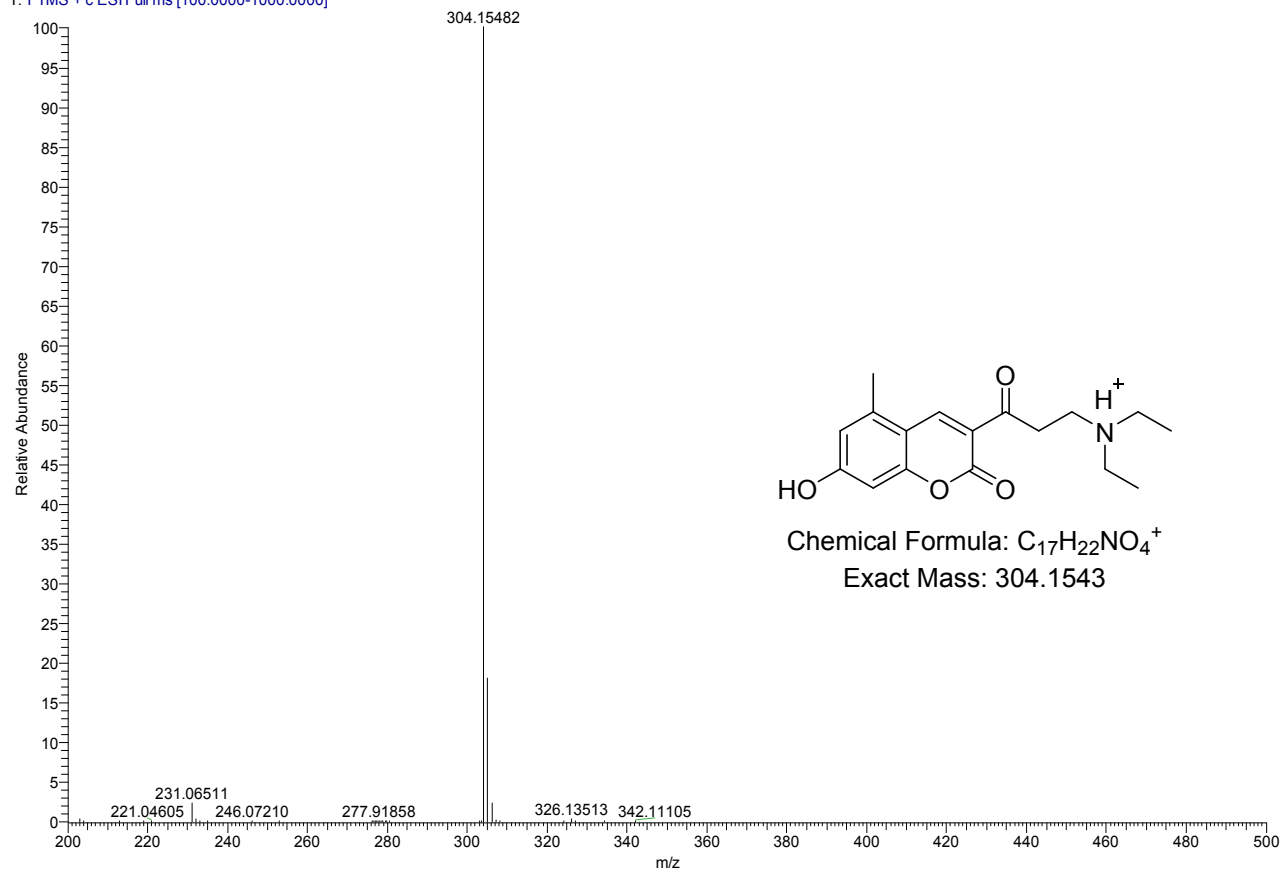

ESI-HRMS spectrum of compound **10**



20 #738 RT: 2.74 AV: 1 NL: 5.57E7  
T: FTMS + c ESI Full ms [100.00-1000.00]

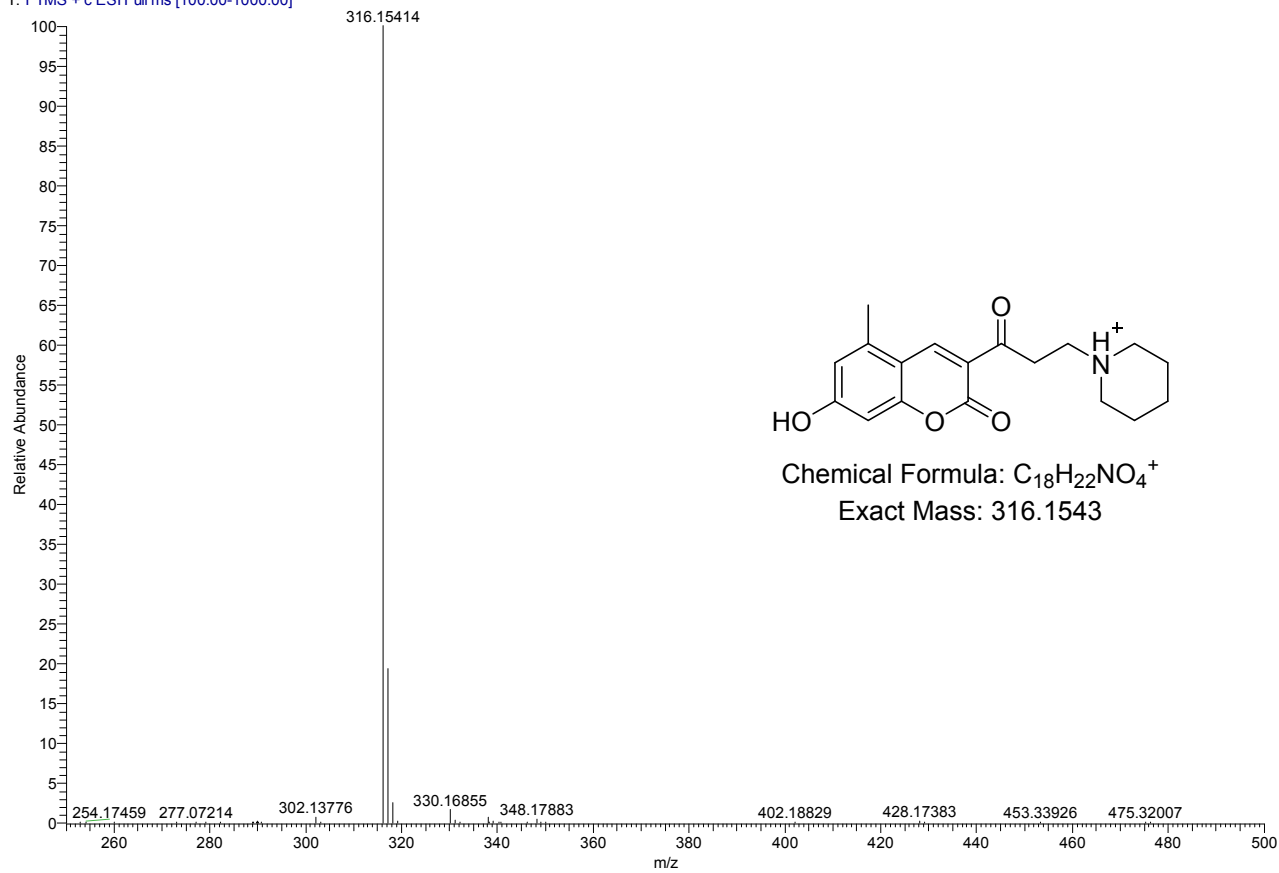

ESI-HRMS spectrum of compound **11**

19 #667 RT: 2.47 AV: 1 NL: 8.67E7  
T: FTMS + c ESI Full ms [100.00-1000.00]

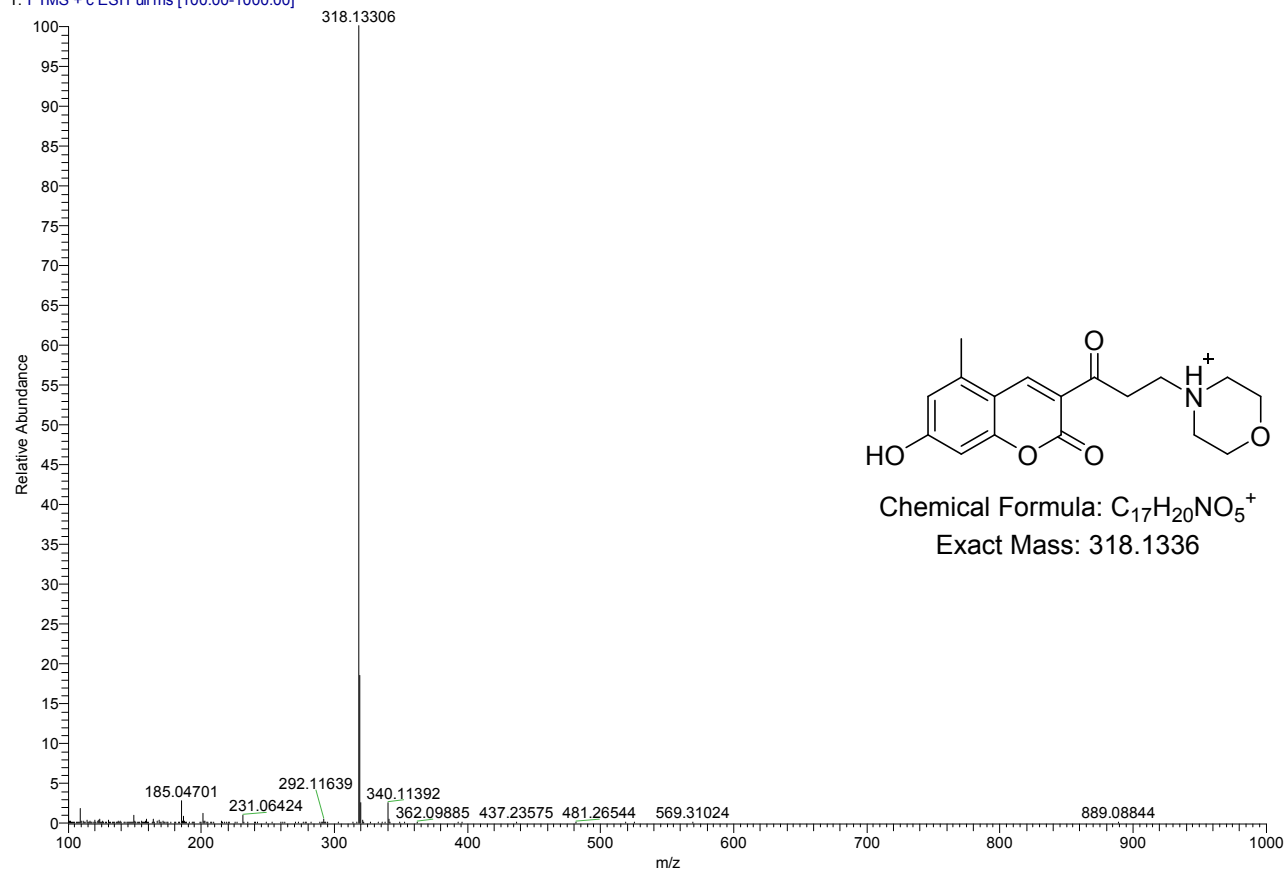

ESI-HRMS spectrum of compound 12

CMB-A20 #791 RT: 2.45 AV: 1 NL: 1.17E9  
T: FTMS + c ESIFull ms [100.0000-1000.0000]

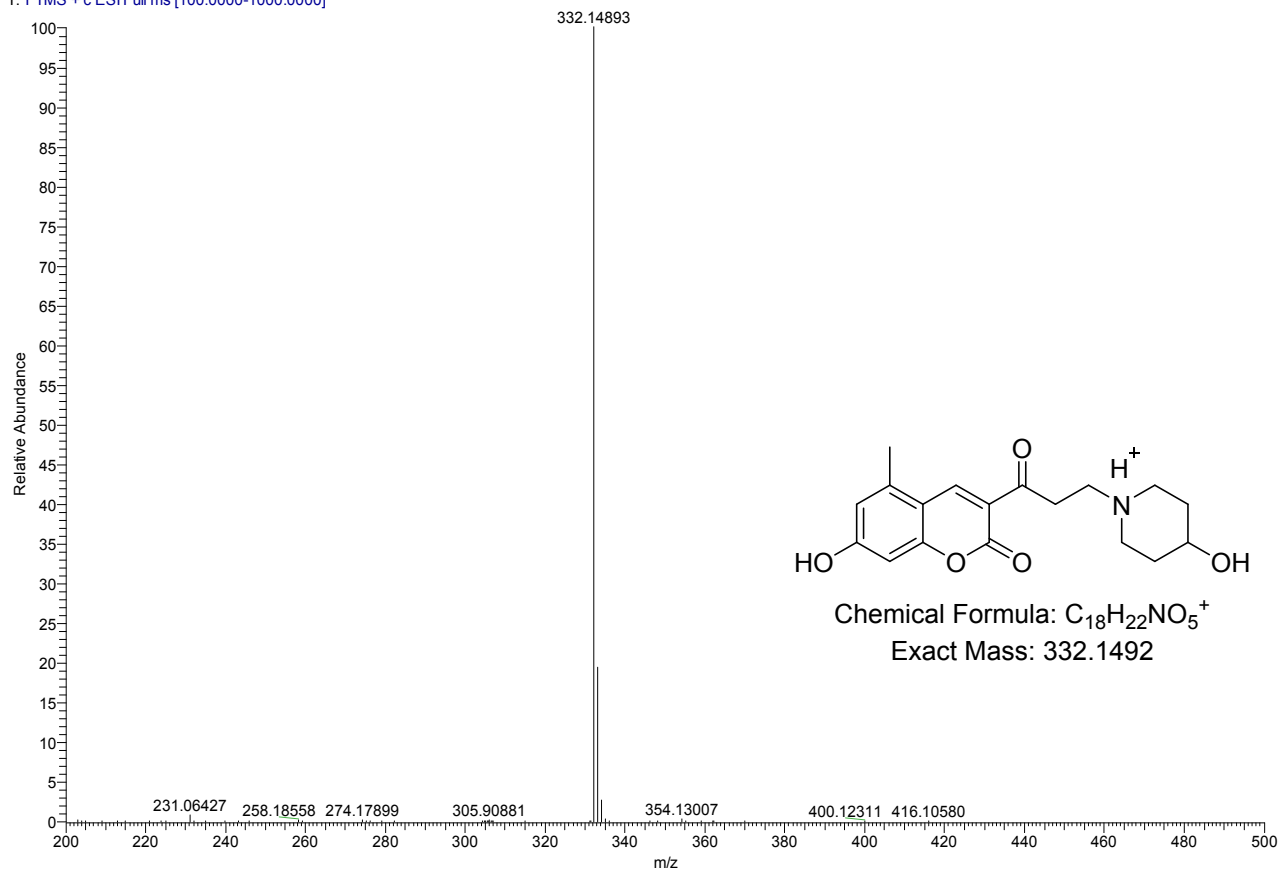

ESI-HRMS spectrum of compound **13**

CMB-A21 #842 RT: 2.53 AV: 1 NL: 1.50E9  
T: FTMS + c ESI Full ms [100.0000-1000.0000]

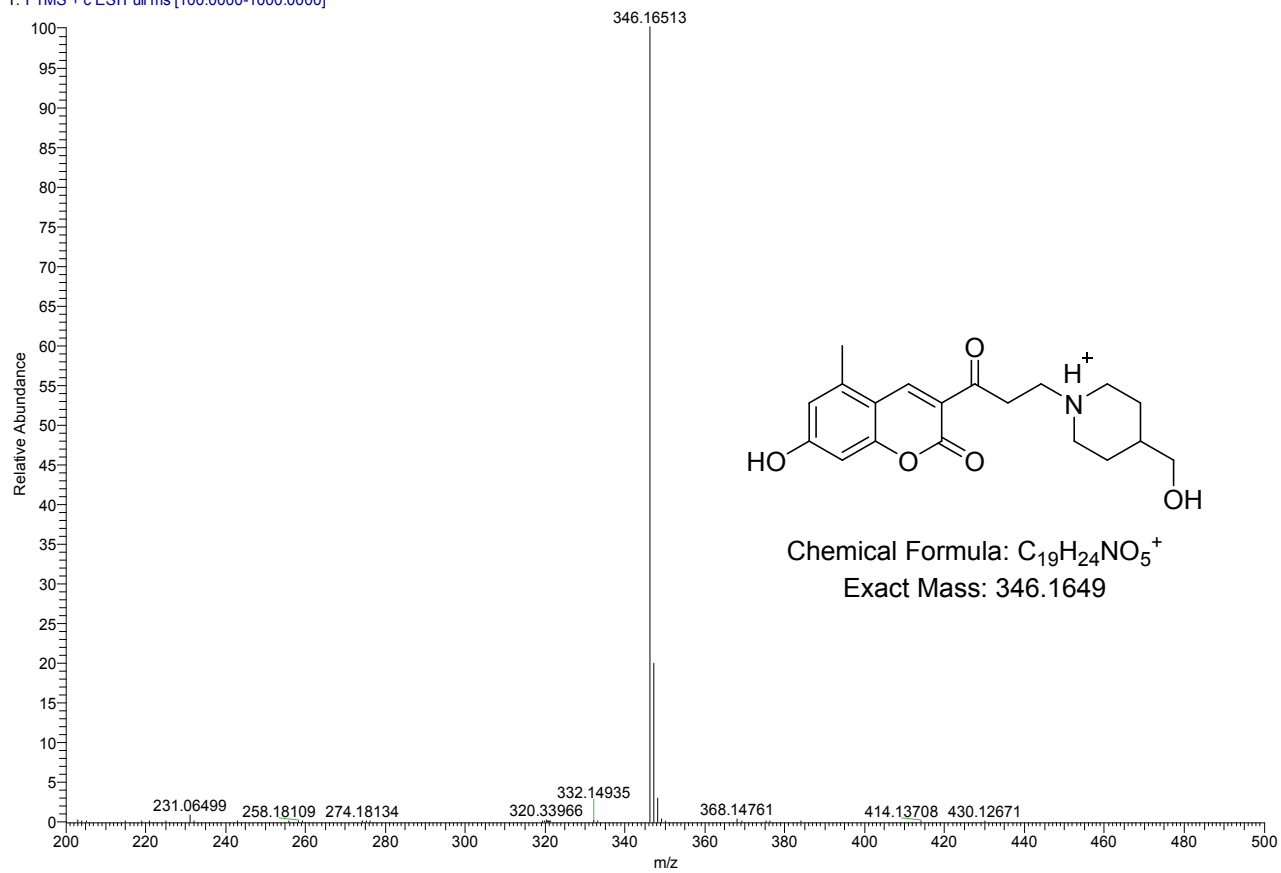

ESI-HRMS spectrum of compound **14**

CMB-A6 #787 RT: 2.34 AV: 1 NL: 1.51E9  
T: FTMS + c ESIFull ms [100.0000-1000.0000]

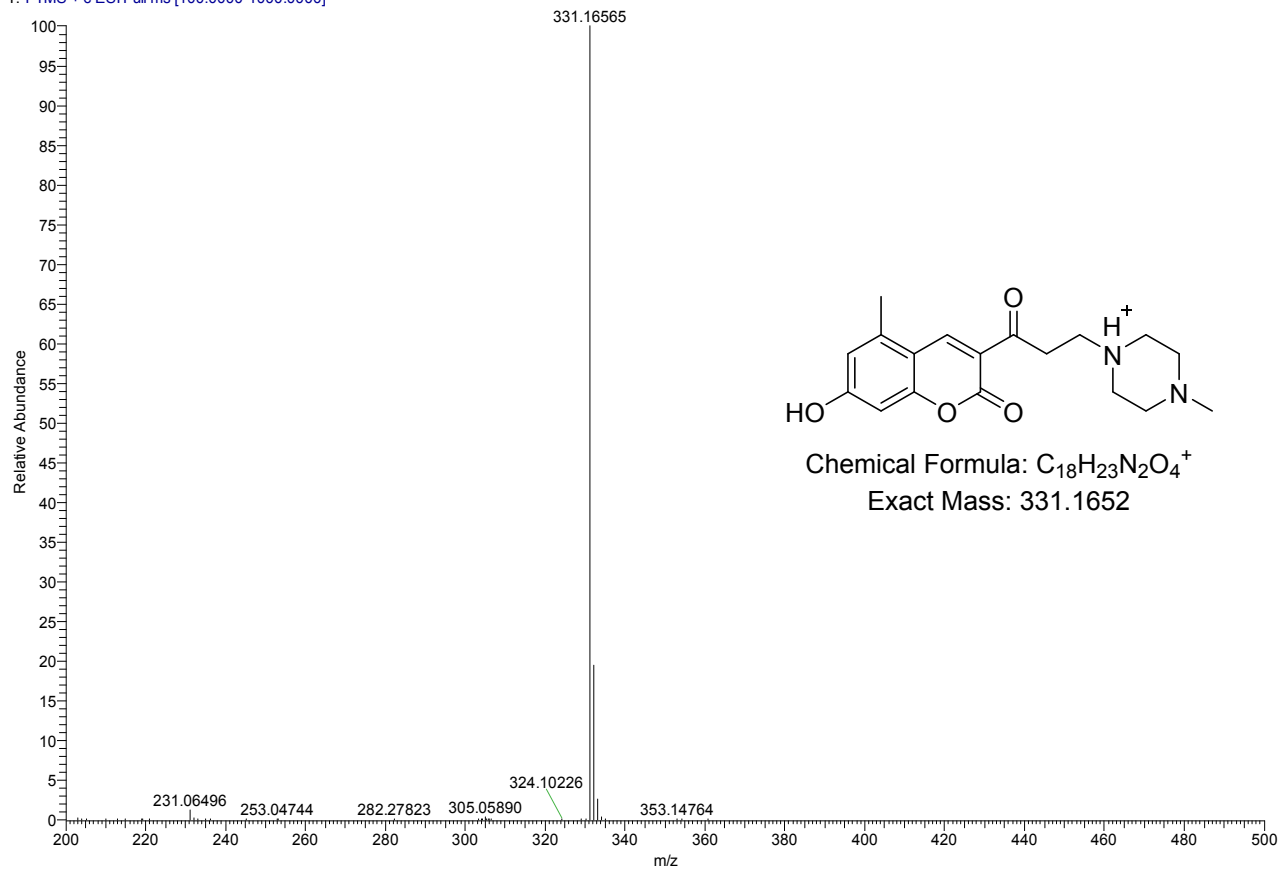

ESI-HRMS spectrum of compound **15**

CMB-A15 #1098 RT: 3.20 AV: 1 NL: 6.83E8  
T: FTMS + c ESI Full ms [100.0000-1000.0000]

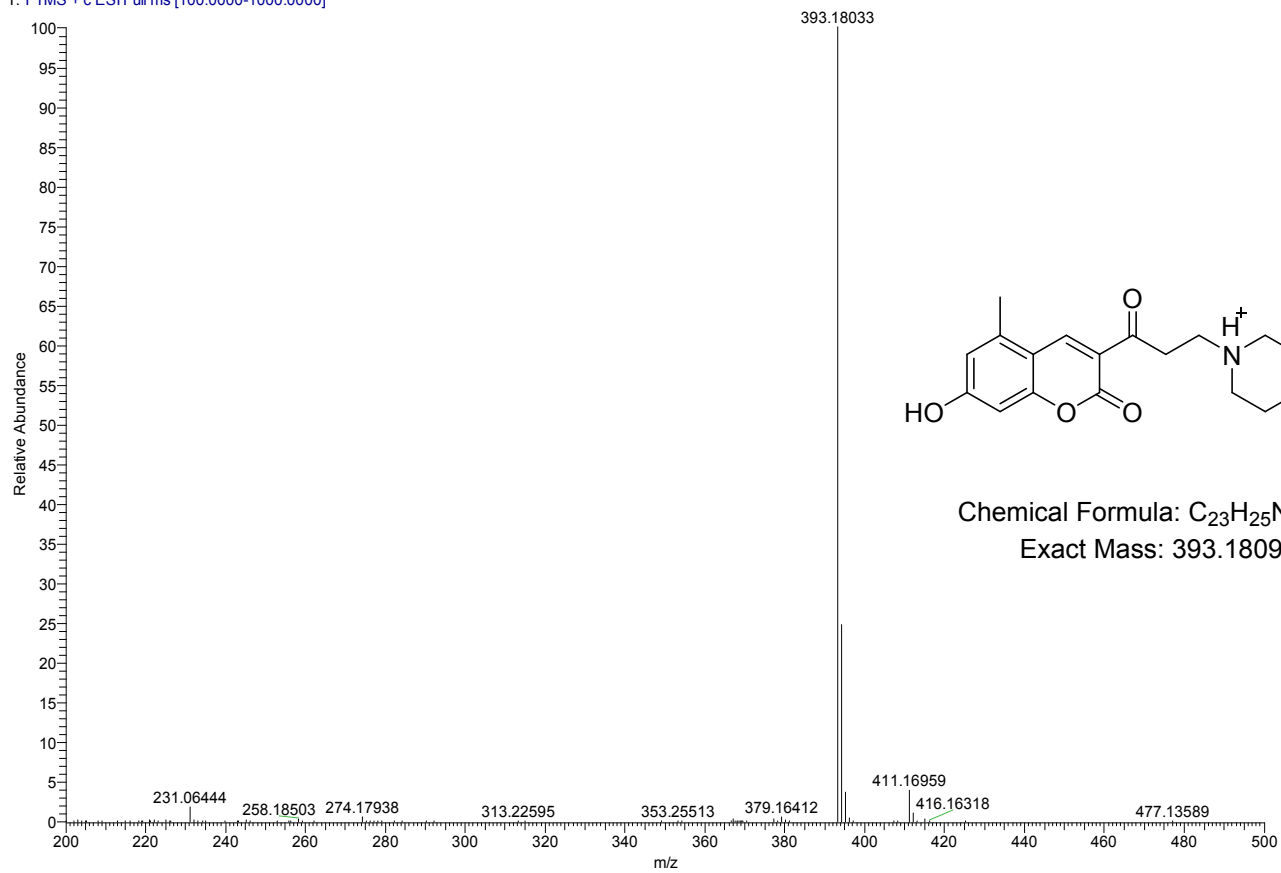

ESI-HRMS spectrum of compound **16**

CMB-A10-2 #1224 RT: 3.27 AV: 1 NL: 6.76E8  
T: FTMS + c ESI Full ms [100.0000-1000.0000]

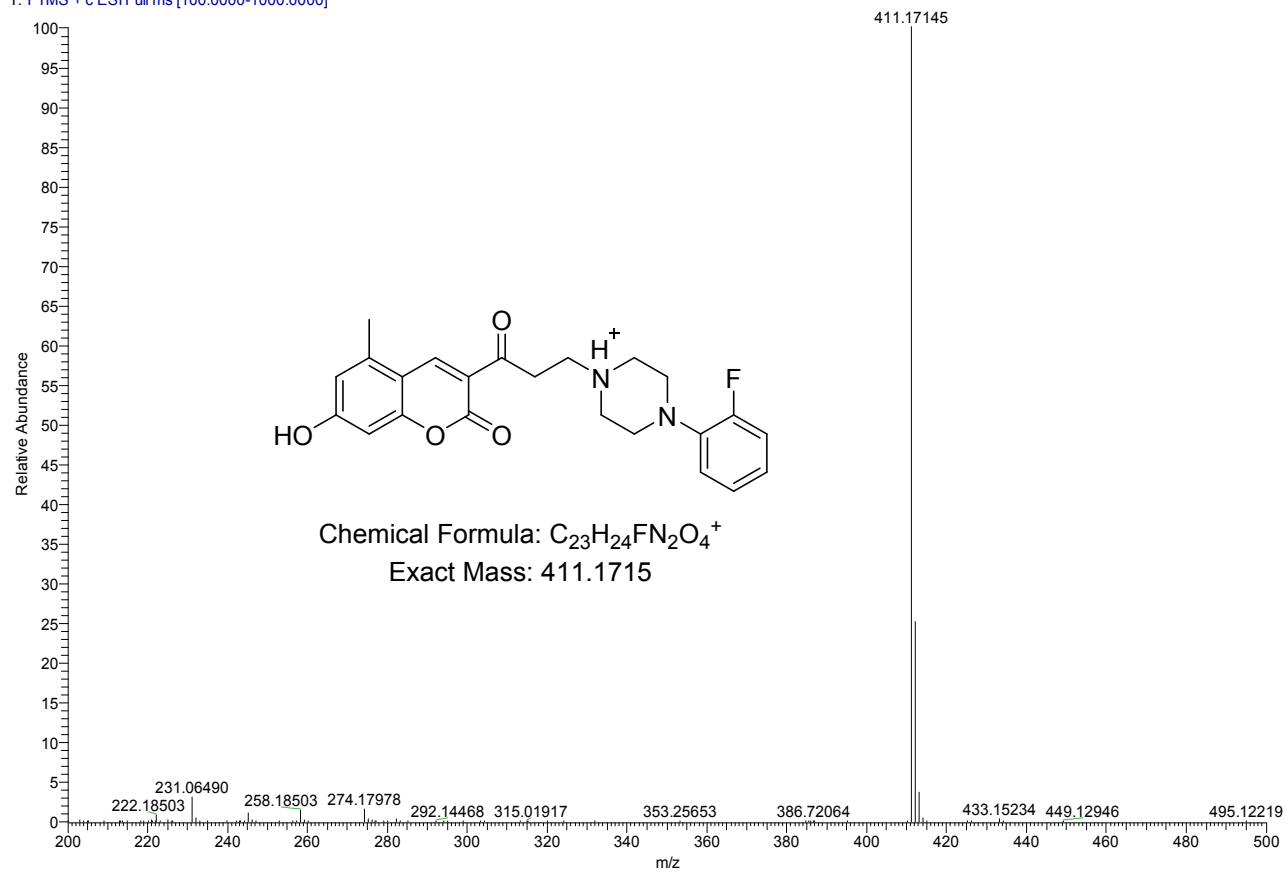

ESI-HRMS spectrum of compound **17**

CMB-A13\_190328211107 #843 RT: 2.44 AV: 1 NL: 5.13E8  
T: FTMS + c ESI Full ms [100.0000-1000.0000]

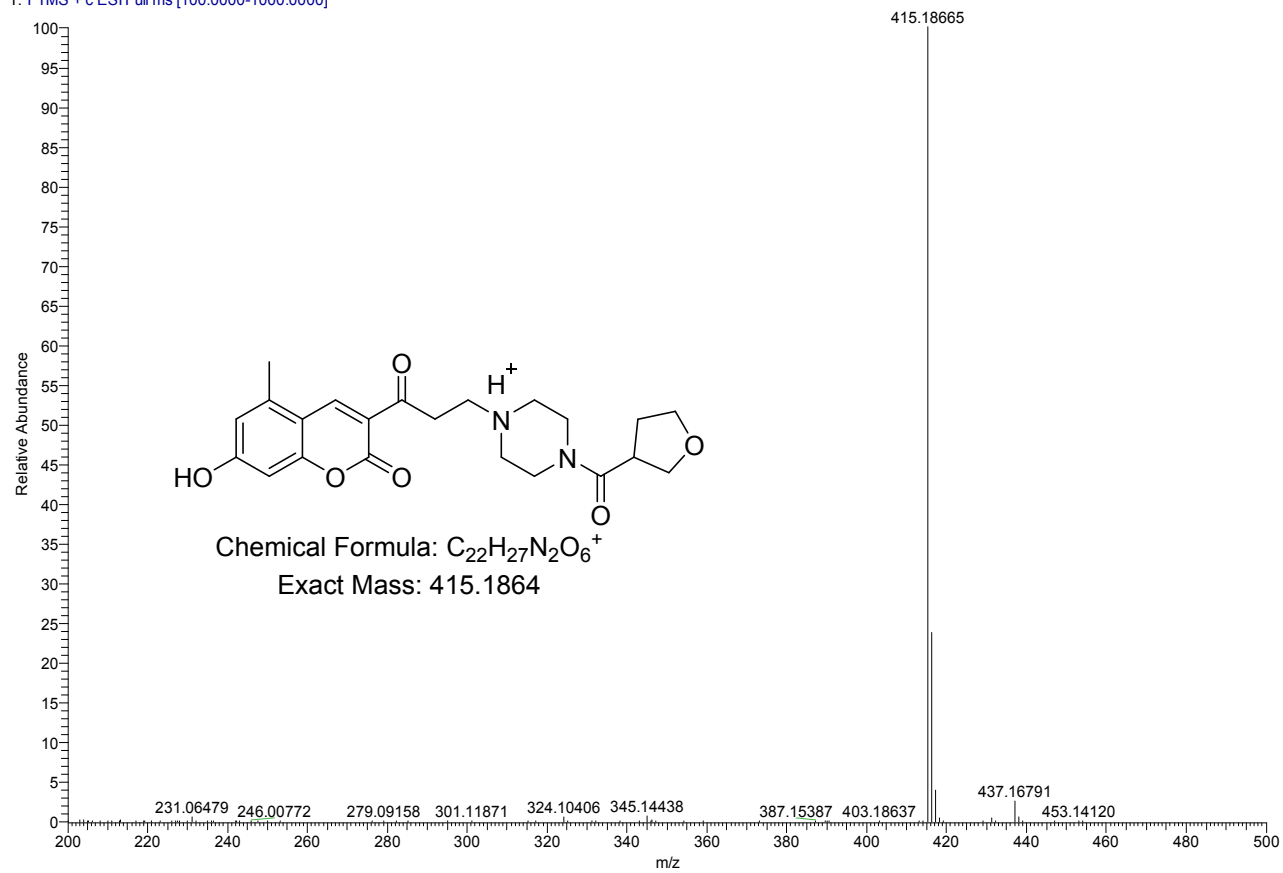

ESI-HRMS spectrum of compound **18**



QMB-C8-15\_19032917401#834 RT: 2.56 AV: 1 NL: 1.86E9  
T: FTMS + cESI Full ps.[100.0000-1000.0000]

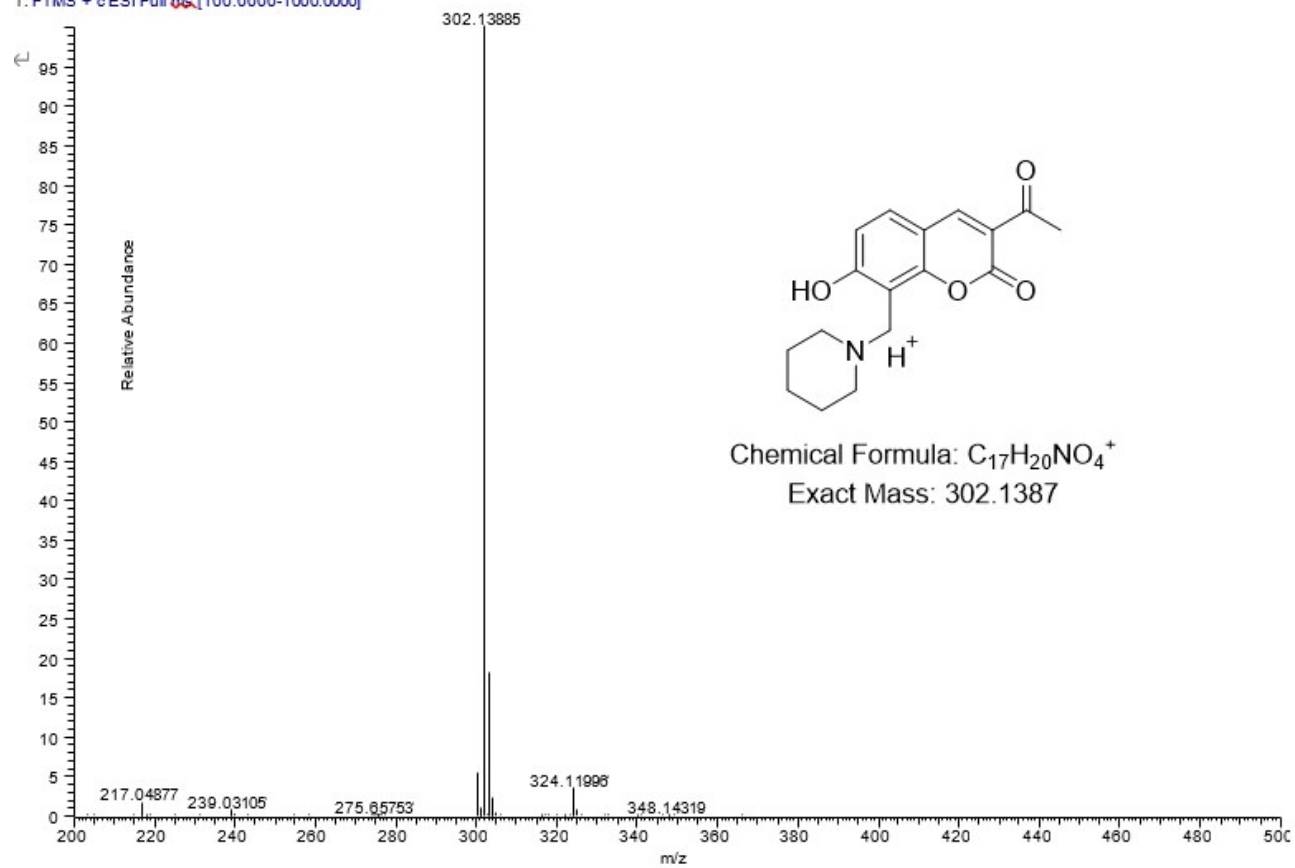

ESI-HRMS spectrum of compound **19**

CMB-C8-16\_190329174847 #765 RT: 2.41 AV: 1 NL: 2.39E9  
T: FTMS + c ESI Full ms [100.0000-1000.0000]

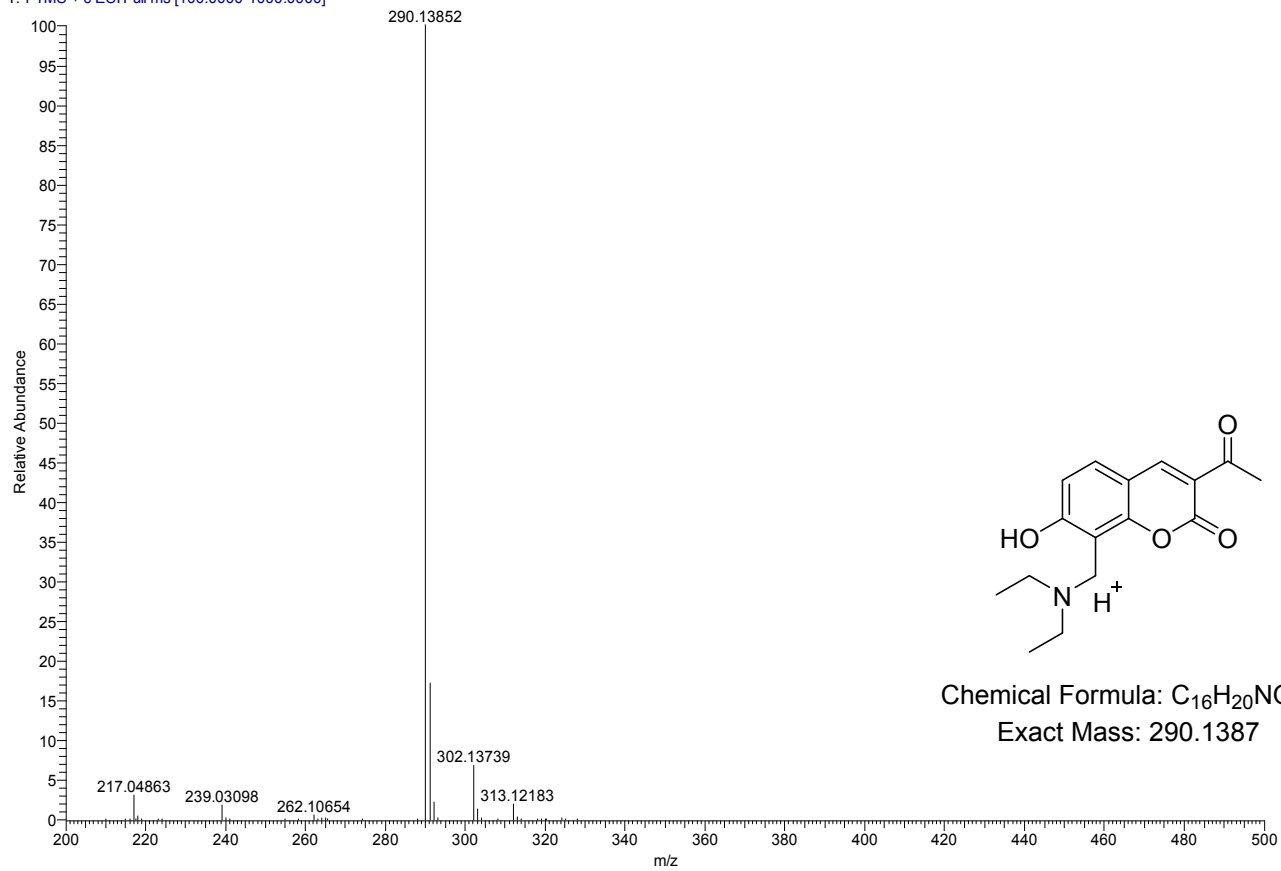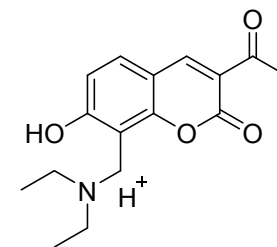

Chemical Formula:  $C_{16}H_{20}NO_4^+$   
Exact Mass: 290.1387

ESI-HRMS spectrum of compound 20

CMB-C8-9\_190328213646 #804 RT: 2.45 AV: 1 NL: 3.94E8  
T: FTMS + c ESI Full ms [100.0000-1000.0000]

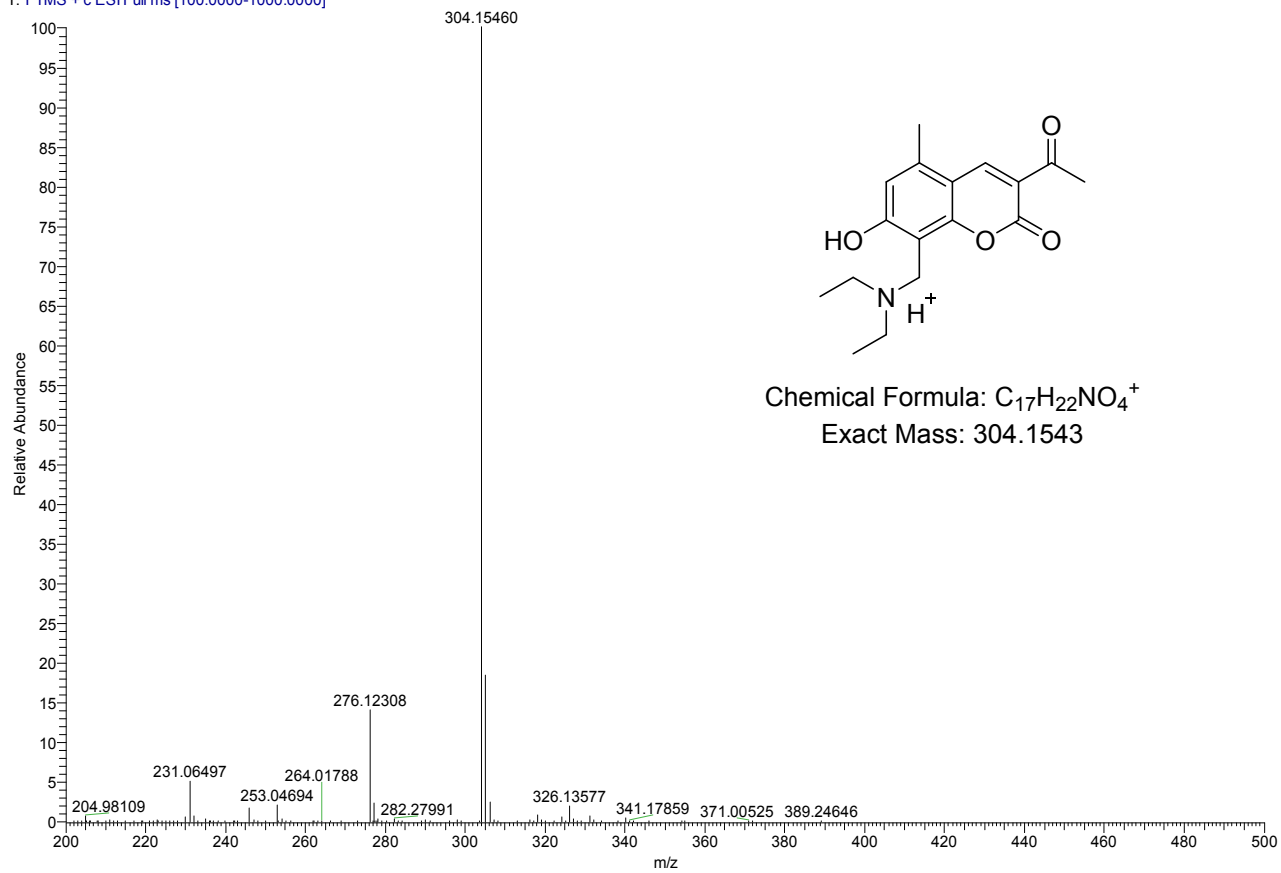

ESI-HRMS spectrum of compound **21**

CMB-C8-2\_190329173142 #863 RT: 2.65 AV: 1 NL: 1.27E9  
T: FTMS + c ESI Full ms [100.0000-1000.0000]

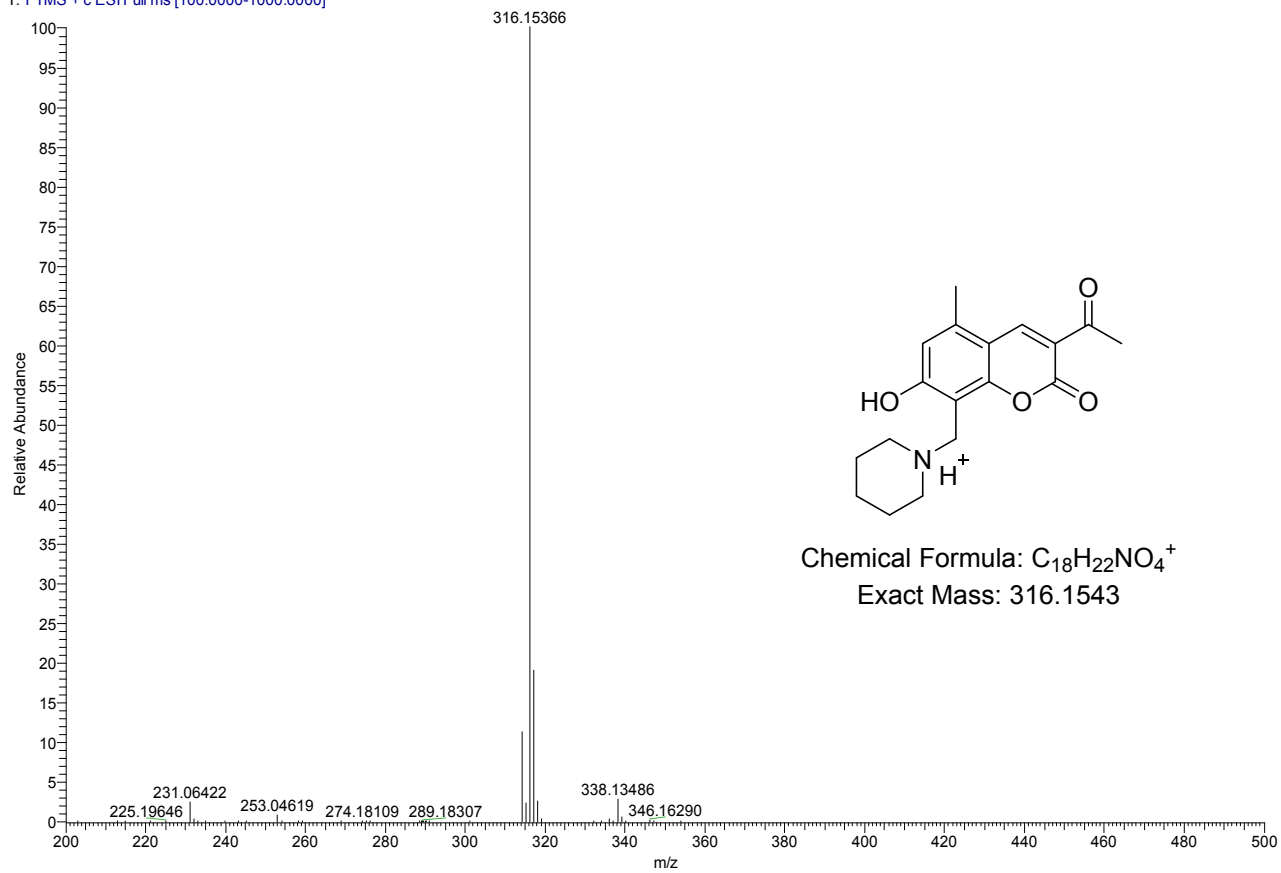

ESI-HRMS spectrum of compound **22**

CMB-C8-1\_190328211942 #861 RT: 2.50 AV: 1 NL: 1.74E9  
T: FTMS + c ESI Full ms [100.0000-1000.0000]

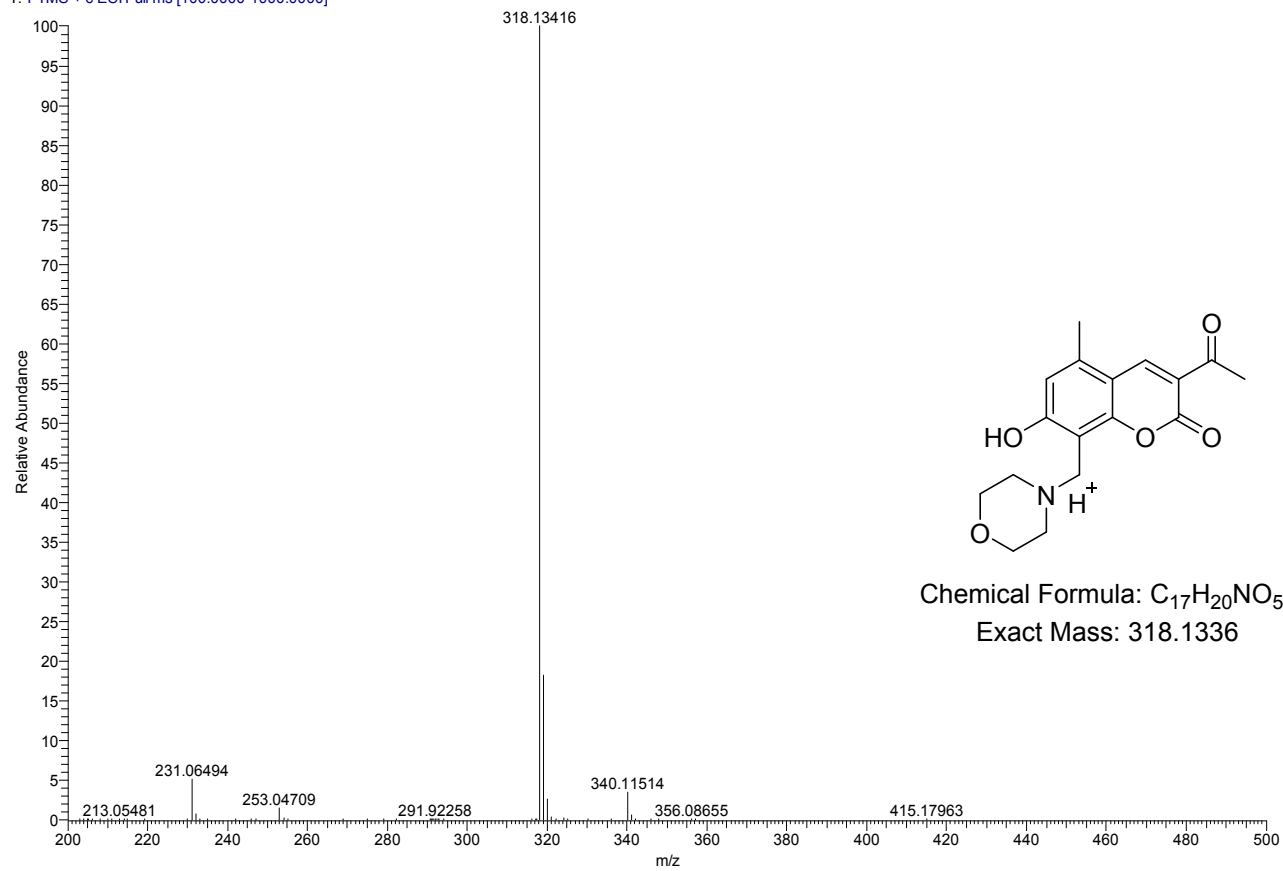

ESI-HRMS spectrum of compound **23**

CMB-C8-6\_190328222805 #845 RT: 2.57 AV: 1 NL: 2.11E8  
T: FTMS + c ESI Full ms [100.0000-1000.0000]

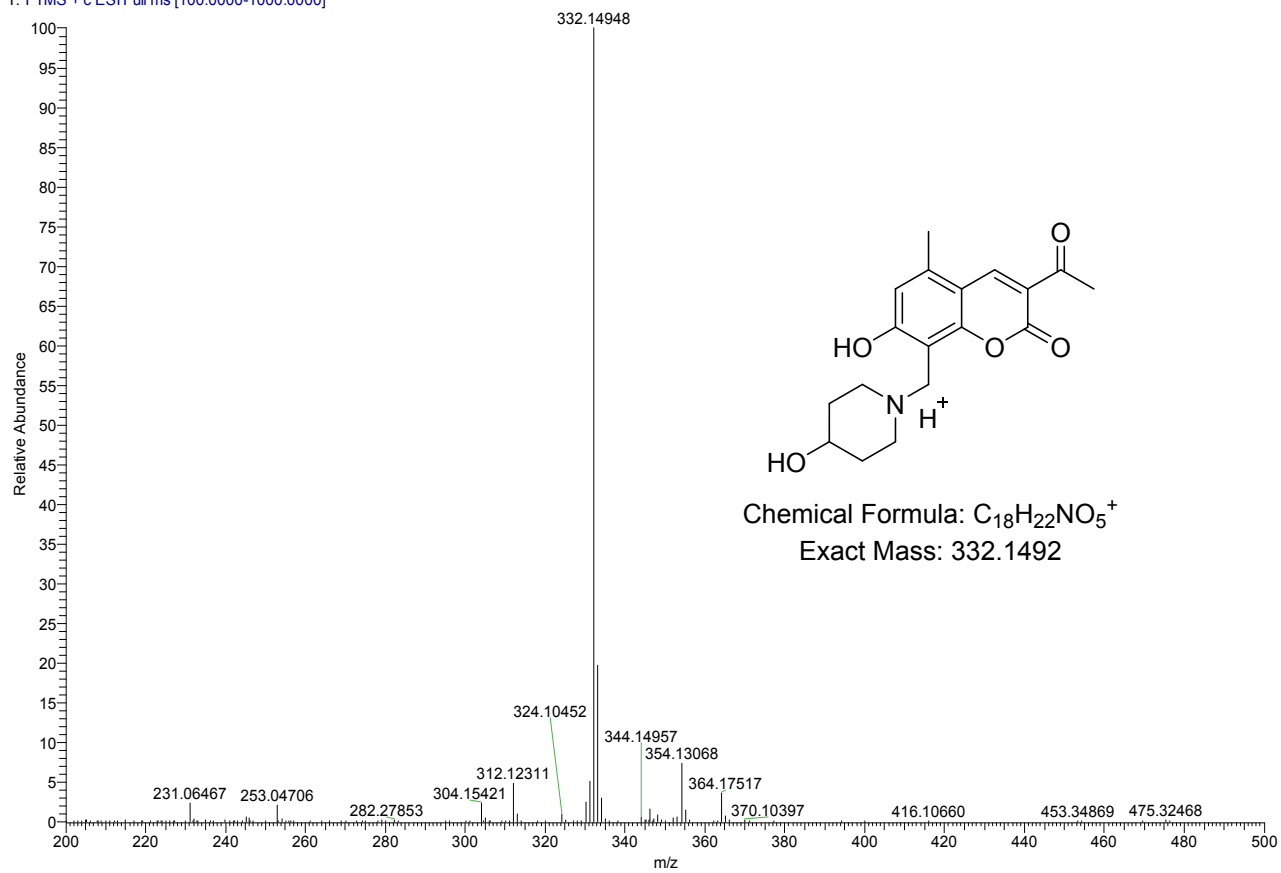

ESI-HRMS spectrum of compound 24

CMB-C8-4\_190328214519 #804 RT: 2.46 AV: 1 NL: 8.37E8  
T: FTMS + c ESI Full ms [100.0000-1000.0000]

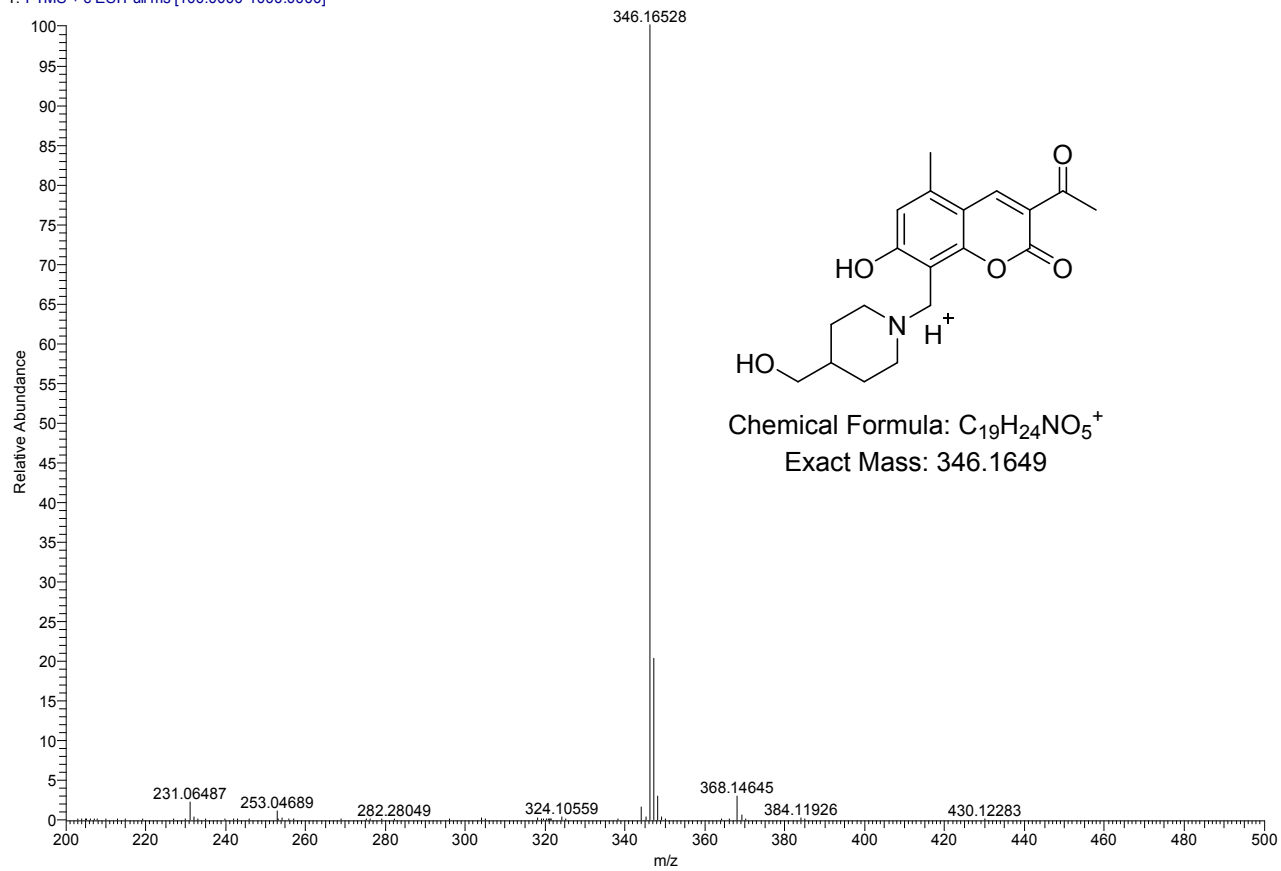

ESI-HRMS spectrum of compound **25**

CMB-C8-17\_190328221931 #779 RT: 2.39 AV: 1 NL: 1.59E9  
T: FTMS + c\_ESIFull ms [100.0000-1000.0000]

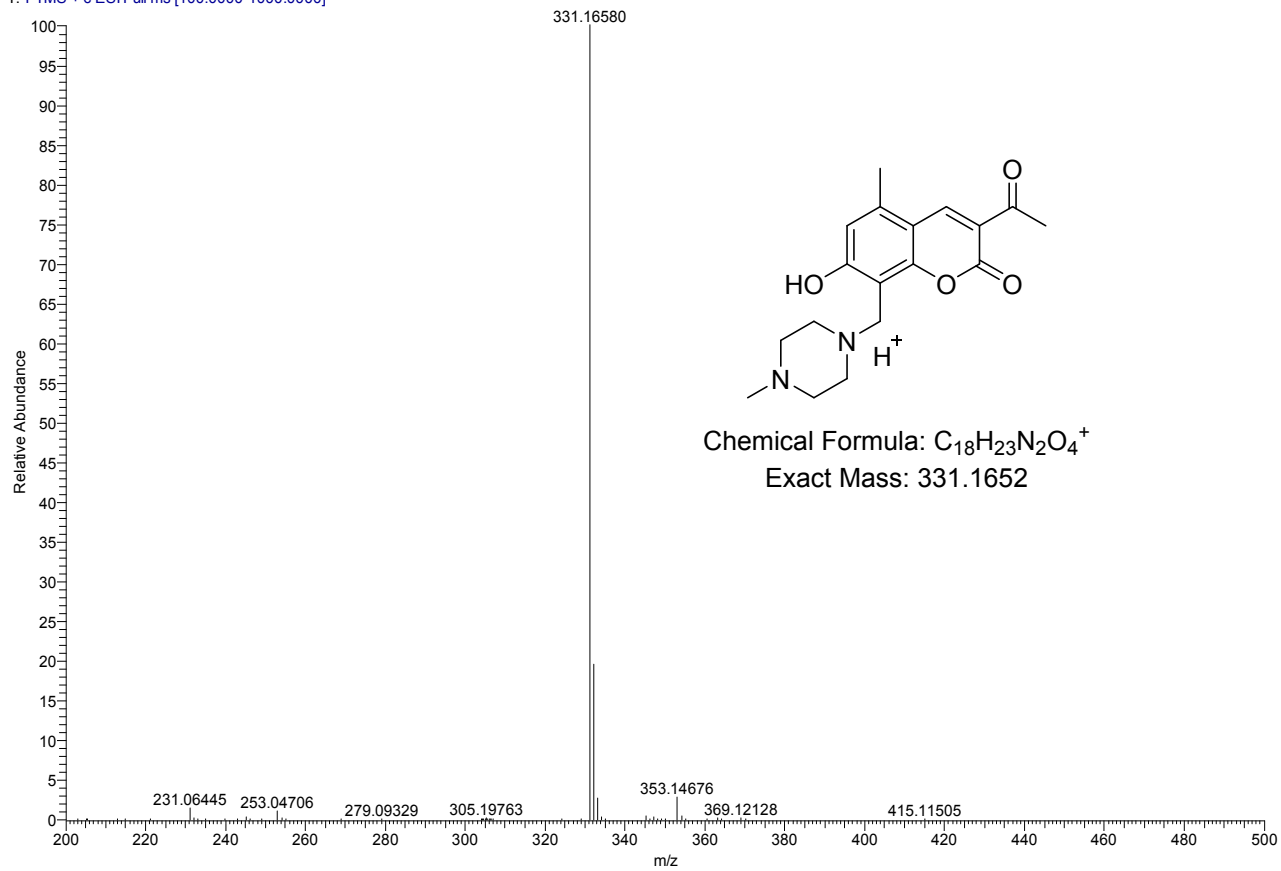

ESI-HRMS spectrum of compound **26**



CMB-C8-18\_190329180553 #960 RT: 3.12 AV: 1 NL: 5.76E8  
T: FTMS + c\_ESIFull ms [100.0000-1000.0000]

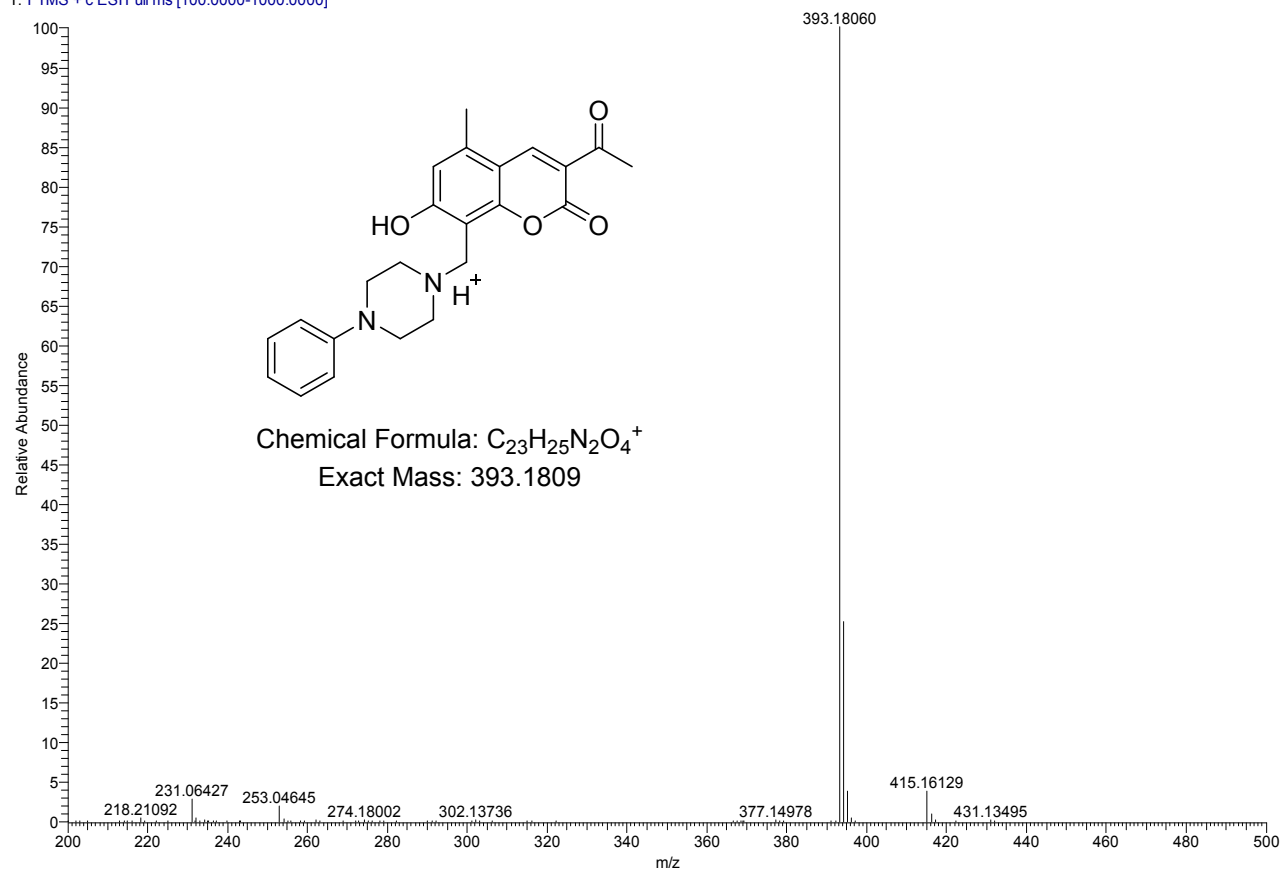

ESI-HRMS spectrum of compound **27**

CMB-C8-10\_190329181426 #1008 RT: 3.27 AV: 1 NL: 1.58E8  
T: FTMS + c\_ESIFull ms [100.0000-1000.0000]

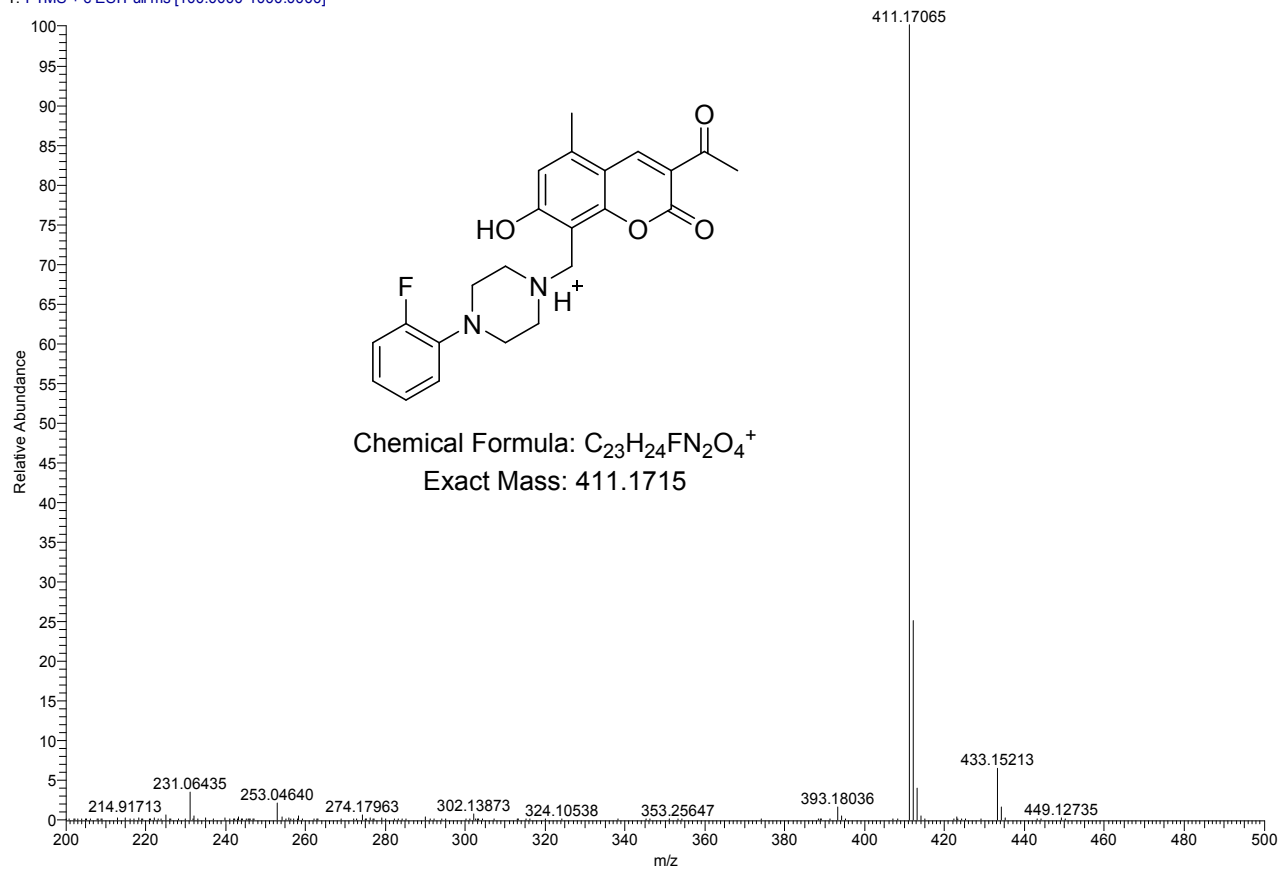

ESI-HRMS spectrum of compound **28**

CMB-C8-8\_190329175720 #758 RT: 2.46 AV: 1 NL: 6.19E8  
T: FTMS + c ESI Full ms [100.0000-1000.0000]

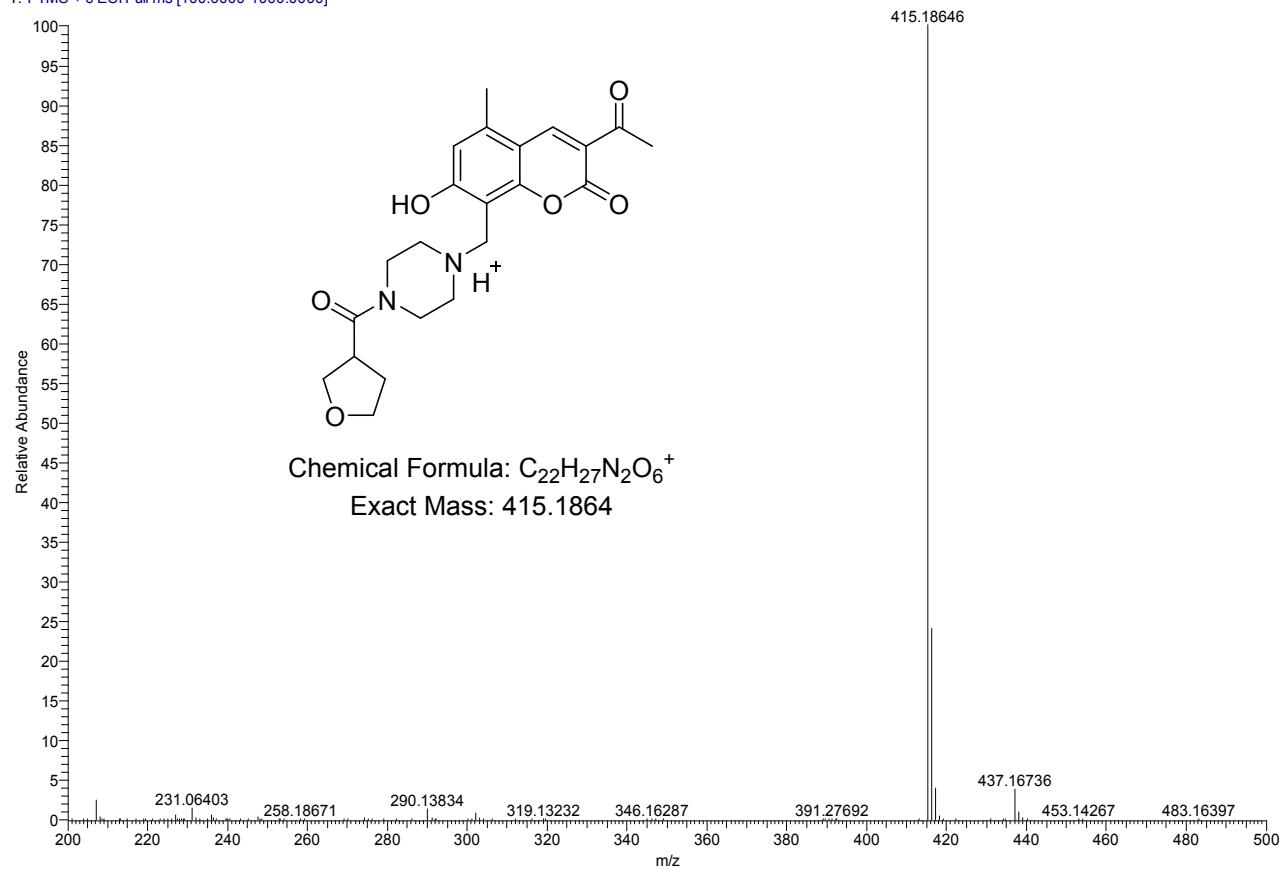

Figure S76. ESI-HRMS spectrum of compound 29

### 3. Cartesian coordinates of compounds 6, 30-33.

#### 1) Compound 6 under neutral conditions

|   |             |             |             |
|---|-------------|-------------|-------------|
| C | 2.99045523  | 1.36371915  | -0.00530994 |
| C | 3.34159626  | -0.00273095 | -0.00444494 |
| C | 2.35909420  | -0.99348503 | -0.00028794 |
| C | 1.02748010  | -0.60737501 | 0.00310806  |
| C | 0.64548606  | 0.74836609  | 0.00171106  |
| C | 1.66157913  | 1.72662616  | -0.00247494 |
| O | 0.08370803  | -1.58381509 | 0.00850206  |
| C | -1.30251407 | -1.34227807 | 0.01217506  |
| C | -1.70834110 | 0.06830102  | 0.00184106  |
| C | -0.74348504 | 1.04039910  | 0.00143306  |
| O | -1.99419011 | -2.32506015 | 0.02682906  |
| O | 4.62785935  | -0.41385197 | -0.00738694 |
| C | -3.16008621 | 0.42152804  | -0.01264094 |
| C | -3.53314925 | 1.89560614  | 0.03198906  |
| O | -4.03500927 | -0.42428403 | -0.06087295 |
| H | 3.76850728  | 2.11815420  | -0.00846494 |
| H | 2.63117222  | -2.04041510 | 0.00065606  |
| H | 1.38504710  | 2.77444524  | -0.00367394 |
| H | -1.03231807 | 2.08417417  | -0.00267794 |
| H | 5.22316139  | 0.34639108  | -0.00979294 |
| H | -4.61933033 | 1.96599215  | 0.03895306  |
| H | -3.13609922 | 2.38402218  | 0.92555512  |
| H | -3.14777622 | 2.43126618  | -0.83971601 |

#### 2) Compound 6 under acidic conditions

|   |             |             |             |
|---|-------------|-------------|-------------|
| C | -3.05553722 | 1.31779510  | -0.09458001 |
| C | -3.35357524 | -0.05582900 | 0.01599400  |
| C | -2.33052617 | -1.00166007 | 0.07820001  |
| C | -1.01694507 | -0.55593104 | 0.03115700  |
| C | -0.68447805 | 0.80427006  | -0.07260901 |
| C | -1.74405913 | 1.73500013  | -0.13889801 |
| O | -0.03053800 | -1.49980711 | 0.07844101  |
| C | 1.30740409  | -1.19196209 | 0.03989900  |
| C | 1.68658912  | 0.21503202  | -0.00985500 |
| C | 0.69554705  | 1.15226408  | -0.09909401 |
| O | 2.07524015  | -2.14273516 | 0.04091300  |
| O | -4.66266534 | -0.39254803 | 0.05506500  |
| C | 3.13323622  | 0.56825304  | 0.02254200  |
| C | 3.59022026  | 1.78323213  | 0.36101203  |
| H | 2.92857321  | 2.58293519  | 0.65720505  |
| H | 4.65438234  | 1.97940014  | 0.34444802  |
| O | 4.02144429  | -0.40549703 | -0.32981202 |

|   |             |             |             |
|---|-------------|-------------|-------------|
| H | 3.55553226  | -1.26435809 | -0.29666102 |
| H | -3.87400028 | 2.02452414  | -0.14176601 |
| H | -2.53655018 | -2.06211315 | 0.15801901  |
| H | -1.51260411 | 2.79038520  | -0.22101202 |
| H | 0.95397507  | 2.20034616  | -0.19516401 |
| H | -4.76441734 | -1.34918810 | 0.13547801  |

3) Compound **30**

|   |             |             |             |
|---|-------------|-------------|-------------|
| C | -2.35700000 | 0.66900000  | 0.04300000  |
| H | -3.31000000 | 1.19500000  | 0.05400000  |
| C | -2.30300000 | -0.72500000 | 0.05000000  |
| C | -1.08300000 | -1.39100000 | 0.03700000  |
| H | -1.04200000 | -2.47700000 | 0.04200000  |
| C | 0.08800000  | -0.63800000 | 0.01700000  |
| C | 0.06300000  | 0.75600000  | 0.01000000  |
| C | -1.17000000 | 1.41000000  | 0.02400000  |
| H | -1.22300000 | 2.49800000  | 0.01900000  |
| O | 1.30900000  | -1.34000000 | 0.00500000  |
| C | 2.52600000  | -0.66700000 | -0.01500000 |
| C | 2.47500000  | 0.80500000  | -0.02200000 |
| H | 3.43000000  | 1.31800000  | -0.03800000 |
| C | 1.32200000  | 1.48200000  | -0.01000000 |
| H | 1.30900000  | 2.56700000  | -0.01600000 |
| O | -3.44200000 | -1.47900000 | 0.06900000  |
| H | -4.22200000 | -0.88000000 | 0.07700000  |
| O | 3.59800000  | -1.27100000 | -0.02600000 |

4) Compound **31**

|   |            |             |             |
|---|------------|-------------|-------------|
| C | 3.25200000 | -6.03500000 | -1.11200000 |
| H | 2.41700000 | -5.62100000 | -1.67300000 |
| C | 3.29400000 | -7.38600000 | -0.77500000 |
| C | 4.36400000 | -7.90500000 | -0.05900000 |
| H | 4.39700000 | -8.95900000 | 0.20400000  |
| C | 5.39800000 | -7.04900000 | 0.31900000  |
| C | 5.39000000 | -5.69100000 | -0.00100000 |
| C | 4.30000000 | -5.19100000 | -0.72500000 |
| H | 4.24500000 | -4.13800000 | -0.99900000 |
| O | 6.45900000 | -7.62300000 | 1.04300000  |
| C | 7.53200000 | -6.85400000 | 1.46200000  |
| C | 7.51100000 | -5.42500000 | 1.11800000  |
| H | 8.37200000 | -4.86300000 | 1.46700000  |
| C | 6.51400000 | -4.84600000 | 0.42900000  |

|   |            |             |             |
|---|------------|-------------|-------------|
| O | 8.46700000 | -7.34500000 | 2.09700000  |
| O | 2.29100000 | -8.23900000 | -1.13600000 |
| H | 1.60700000 | -7.73800000 | -1.63400000 |
| C | 6.65500000 | -3.40000000 | 0.17100000  |
| C | 6.15000000 | -2.46700000 | 1.08600000  |
| H | 5.64700000 | -2.79900000 | 1.99300000  |
| C | 6.28400000 | -1.09900000 | 0.84000000  |
| H | 5.88900000 | -0.37800000 | 1.55300000  |
| C | 6.92400000 | -0.65700000 | -0.31700000 |
| H | 7.02900000 | 0.41000000  | -0.50700000 |
| C | 7.43100000 | -1.58100000 | -1.23200000 |
| H | 7.93000000 | -1.23400000 | -2.13500000 |
| C | 7.29800000 | -2.94900000 | -0.99000000 |
| H | 7.69600000 | -3.66000000 | -1.71200000 |

5) Compound **32**

|   |             |             |             |
|---|-------------|-------------|-------------|
| C | 4.78300000  | -5.38200000 | -0.11000000 |
| C | 4.80800000  | -6.77400000 | -0.14800000 |
| H | 3.89100000  | -7.35500000 | -0.21500000 |
| C | 6.03400000  | -7.43200000 | -0.09900000 |
| H | 6.07200000  | -8.51900000 | -0.12800000 |
| C | 7.21000000  | -6.68400000 | -0.01300000 |
| C | 7.20400000  | -5.28800000 | 0.02600000  |
| C | 5.96300000  | -4.64000000 | -0.02400000 |
| H | 5.89400000  | -3.55500000 | 0.00300000  |
| O | 8.41200000  | -7.41600000 | 0.03200000  |
| C | 9.63700000  | -6.77500000 | 0.11800000  |
| C | 9.61700000  | -5.30400000 | 0.15900000  |
| H | 10.59300000 | -4.83500000 | 0.22600000  |
| C | 8.48800000  | -4.58000000 | 0.11700000  |
| O | 10.69500000 | -7.40300000 | 0.15900000  |
| O | 3.60300000  | -4.69500000 | -0.15500000 |
| H | 2.86000000  | -5.33700000 | -0.21400000 |
| C | 8.52200000  | -3.07900000 | 0.16100000  |
| H | 9.54600000  | -2.69600000 | 0.22800000  |
| H | 7.97800000  | -2.70400000 | 1.03500000  |
| H | 8.07600000  | -2.65400000 | -0.74400000 |

6) Compound **33**

|   |            |             |             |
|---|------------|-------------|-------------|
| C | 4.75200000 | -5.29600000 | -0.24700000 |
| H | 3.81000000 | -4.76800000 | -0.39700000 |
| C | 4.73000000 | -6.68200000 | -0.06100000 |
| C | 5.93900000 | -7.35400000 | 0.10500000  |

|   |             |             |             |
|---|-------------|-------------|-------------|
| H | 5.95800000  | -8.43500000 | 0.23300000  |
| C | 7.13900000  | -6.63600000 | 0.10700000  |
| C | 7.19600000  | -5.24600000 | -0.06100000 |
| C | 5.96600000  | -4.59000000 | -0.24200000 |
| O | 8.30100000  | -7.41400000 | 0.29100000  |
| C | 9.55700000  | -6.83800000 | 0.31600000  |
| C | 9.61400000  | -5.38100000 | 0.14300000  |
| H | 10.61400000 | -4.96100000 | 0.16900000  |
| C | 8.53000000  | -4.60900000 | -0.03500000 |
| O | 10.57700000 | -7.50800000 | 0.47500000  |
| C | 8.69300000  | -3.12500000 | -0.20300000 |
| H | 8.17300000  | -2.58200000 | 0.59300000  |
| H | 9.74500000  | -2.82200000 | -0.15300000 |
| H | 8.31900000  | -2.79800000 | -1.17800000 |
| O | 5.91900000  | -3.23100000 | -0.42300000 |
| H | 4.98600000  | -2.94200000 | -0.53200000 |
| C | 3.43400000  | -7.43800000 | -0.10100000 |
| H | 2.61500000  | -6.82900000 | 0.29700000  |
| H | 3.49000000  | -8.34400000 | 0.51000000  |
| H | 3.19700000  | -7.72000000 | -1.13200000 |

#### 4. Sources of the reagents used in the synthesis process

| Reagent                          | Brand    | Catalogue number |
|----------------------------------|----------|------------------|
| Piperidine hydrochloride         | Aladdin  | P194173-10g      |
| Diethylamine hydrochloride       | Alfa     | A13637           |
| Morpholine hydrochloride         | ARK      | AK116221         |
| 4-Hydroxypiperidine              | Alfa     | B22723           |
| 4-Piperidinemethanol             | Innochem | A37590           |
| 1-Methylpiperazine               | Innochem | A59775           |
| 1-Phenylpiperazine               | Innochem | A61669           |
| 1-(2-Fluorophenyl)piperazine     | Aladdin  | F156585-5g       |
| 1-(2-Tetrahydrofuroyl)piperazine | TCI      | T2617            |
